# Supplementary material for: A Comprehensive In Silico Method to Study the QSTR of the Aconitine Alkaloids for Designing Novel Drugs
Source: MDPI journal article supplement (doi:10.3390/molecules23092385), 2018-09-18
Supplement: s1 [file s1]

Table S1. The centrality measurements of 147 nodes were calculated by CytoNCA

| Protein  | Subgragh              | Degree       | Eigenvector                | Information            | LAC            | Betweenness            | Closeness             | Network            |
|----------|-----------------------|--------------|----------------------------|------------------------|----------------|------------------------|-----------------------|--------------------|
| UNC79    | Subgragh: 2089588.9   | Degree: 7.0  | Eigenvector: 0.07232144    | Information: 4.078461  | LAC: 6.571429  | Betweenness: 0.0       | Closeness: 0.3056133  | Network: 7.0       |
| TRH      | Subgragh: 24.627142   | Degree: 3.0  | Eigenvector: 1.7988276E-4  | Information: 2.7136943 | LAC: 2.0       | Betweenness: 0.0       | Closeness: 0.24747474 | Network: 3.0       |
| TRDN     | Subgragh: 1781333.5   | Degree: 12.0 | Eigenvector: 0.06675436    | Information: 5.056548  | LAC: 6.6666665 | Betweenness: 79.470894 | Closeness: 0.3310811  | Network: 8.495022  |
| TLX2     | Subgragh: 129.83693   | Degree: 1.0  | Eigenvector: 5.55129E-4    | Information: 1.6256909 | LAC: 0.0       | Betweenness: 0.0       | Closeness: 0.26110125 | Network: 0.0       |
| TJP1     | Subgragh: 3406.994    | Degree: 11.0 | Eigenvector: 3.752259E-4   | Information: 4.8998713 | LAC: 7.818182  | Betweenness: 75.21795  | Closeness: 0.27683616 | Network: 9.330556  |
| SUCLG2   | Subgragh: 336.19208   | Degree: 4.0  | Eigenvector: 1.6575721E-4  | Information: 3.1330578 | LAC: 1.5       | Betweenness: 785.5439  | Closeness: 0.25880283 | Network: 2.6666667 |
| SUCLG1   | Subgragh: 1904.4441   | Degree: 5.0  | Eigenvector: 2.9481309E-5  | Information: 3.4929106 | LAC: 1.6       | Betweenness: 52.727272 | Closeness: 0.21273516 | Network: 3.1666667 |
| SRC      | Subgragh: 4463.0786   | Degree: 13.0 | Eigenvector: 3.992194E-4   | Information: 5.1990433 | LAC: 8.153846  | Betweenness: 189.98155 | Closeness: 0.27788278 | Network: 10.753283 |
| SPTR     | Subgragh: 22.947414   | Degree: 3.0  | Eigenvector: 1.7890391E-4  | Information: 2.7136943 | LAC: 2.0       | Betweenness: 0.0       | Closeness: 0.24747474 | Network: 3.0       |
| SPTAN1   | Subgragh: 1.7554642E7 | Degree: 27.0 | Eigenvector: 0.20962904    | Information: 6.36491   | LAC: 15.0      | Betweenness: 146.27417 | Closeness: 0.3245033  | Network: 20.600204 |
| SPEG     | Subgragh: 453844.44   | Degree: 5.0  | Eigenvector: 0.033703953   | Information: 3.4929101 | LAC: 4.0       | Betweenness: 0.0       | Closeness: 0.27579737 | Network: 5.0       |
| SMIM3    | Subgragh: 5671.4917   | Degree: 1.0  | Eigenvector: 0.0037591923  | Information: 1.6256909 | LAC: 0.0       | Betweenness: 0.0       | Closeness: 0.25       | Network: 0.0       |
| SLN      | Subgragh: 1597.9031   | Degree: 2.0  | Eigenvector: 0.0019852547  | Information: 2.2187285 | LAC: 1.0       | Betweenness: 0.0       | Closeness: 0.26873857 | Network: 2.0       |
| SLC8A2   | Subgragh: 479.4813    | Degree: 4.0  | Eigenvector: 0.0010086364  | Information: 3.1330578 | LAC: 2.0       | Betweenness: 6.428571  | Closeness: 0.2658228  | Network: 3.3333333 |
| SLC8A1   | Subgragh: 48875.285   | Degree: 11.0 | Eigenvector: 0.011002112   | Information: 4.8998713 | LAC: 1.2727273 | Betweenness: 3227.5715 | Closeness: 0.352518   | Network: 3.0444446 |
| SLC24A4  | Subgragh: 159.0656    | Degree: 2.0  | Eigenvector: 6.058204E-4   | Information: 2.2187285 | LAC: 1.0       | Betweenness: 0.0       | Closeness: 0.26156583 | Network: 2.0       |
| SLC24A1  | Subgragh: 129.83714   | Degree: 1.0  | Eigenvector: 5.55129E-4    | Information: 1.6256909 | LAC: 0.0       | Betweenness: 0.0       | Closeness: 0.26110125 | Network: 0.0       |
| SDHA     | Subgragh: 26.816303   | Degree: 3.0  | Eigenvector: 1.03786915E-5 | Information: 2.7136943 | LAC: 2.0       | Betweenness: 0.0       | Closeness: 0.20851064 | Network: 3.0       |
| SCN9A    | Subgragh: 7722179.0   | Degree: 14.0 | Eigenvector: 0.13903475    | Information: 5.329195  | LAC: 12.571428 | Betweenness: 4.111687  | Closeness: 0.31612903 | Network: 13.0      |
| SCN8A    | Subgragh: 1.648715E7  | Degree: 27.0 | Eigenvector: 0.2031519     | Information: 6.36491   | LAC: 14.333333 | Betweenness: 699.464   | Closeness: 0.3888889  | Network: 19.604874 |
| SCN5A    | Subgragh: 1.8514544E7 | Degree: 31.0 | Eigenvector: 0.21528004    | Information: 6.5484676 | LAC: 14.451612 | Betweenness: 210.63019 | Closeness: 0.34186047 | Network: 22.573725 |
| SCN4B    | Subgragh: 8115817.5   | Degree: 15.0 | Eigenvector: 0.14253327    | Information: 5.4485474 | LAC: 12.8      | Betweenness: 4.2251296 | Closeness: 0.31545064 | Network: 12.857142 |
| SCN4A    | Subgragh: 1.2874699E7 | Degree: 22.0 | Eigenvector: 0.17952275    | Information: 6.0690484 | LAC: 14.909091 | Betweenness: 471.72296 | Closeness: 0.380829   | Network: 17.536987 |
| SCN3A    | Subgragh: 1.1230335E7 | Degree: 22.0 | Eigenvector: 0.16766313    | Information: 6.0690484 | LAC: 12.636364 | Betweenness: 458.6836  | Closeness: 0.383812   | Network: 14.942498 |
| SCN2B    | Subgragh: 4642965.5   | Degree: 11.0 | Eigenvector: 0.10780419    | Information: 4.8998713 | LAC: 10.909091 | Betweenness: 0.0       | Closeness: 0.31012657 | Network: 11.0      |
| SCN2A    | Subgragh: 1.5761408E7 | Degree: 25.0 | Eigenvector: 0.19863097    | Information: 6.256977  | LAC: 14.4      | Betweenness: 582.7256  | Closeness: 0.3878628  | Network: 18.782938 |
| SCN1B    | Subgragh: 8115817.5   | Degree: 15.0 | Eigenvector: 0.14253327    | Information: 5.4485474 | LAC: 12.8      | Betweenness: 4.2251296 | Closeness: 0.31545064 | Network: 12.857142 |
| SCN1A    | Subgragh: 1.576141E7  | Degree: 25.0 | Eigenvector: 0.19863099    | Information: 6.256977  | LAC: 14.4      | Betweenness: 582.7256  | Closeness: 0.3878628  | Network: 18.782938 |
| SCN11A   | Subgragh: 1.2825613E7 | Degree: 23.0 | Eigenvector: 0.1791823     | Information: 6.1355953 | LAC: 11.130435 | Betweenness: 166.26895 | Closeness: 0.3402778  | Network: 14.024    |
| SCN10A   | Subgragh: 2.1285332E7 | Degree: 30.0 | Eigenvector: 0.2308326     | Information: 6.5061    | LAC: 14.7      | Betweenness: 136.02132 | Closeness: 0.32885906 | Network: 22.48266  |
| RYR2     | Subgragh: 5008254.0   | Degree: 21.0 | Eigenvector: 0.1119402     | Information: 5.998078  | LAC: 8.380953  | Betweenness: 2565.1418 | Closeness: 0.4072022  | Network: 13.886735 |
| RYR1     | Subgragh: 3507420.0   | Degree: 18.0 | Eigenvector: 0.093674414   | Information: 5.753736  | LAC: 7.111111  | Betweenness: 960.59735 | Closeness: 0.35507247 | Network: 10.331071 |
| RYA-R44F | Subgragh: 12.946826   | Degree: 1.0  | Eigenvector: 1.5892624E-4  | Information: 1.6256909 | LAC: 0.0       | Betweenness: 0.0       | Closeness: 0.24664429 | Network: 0.0       |
| RBPJ     | Subgragh: 1554.7837   | Degree: 10.0 | Eigenvector: 0.0011919751  | Information: 4.7267814 | LAC: 7.2       | Betweenness: 30.74667  | Closeness: 0.256993   | Network: 9.541667  |
| PXN      | Subgragh: 2801.8445   | Degree: 10.0 | Eigenvector: 2.053579E-4   | Information: 4.7267814 | LAC: 7.0       | Betweenness: 18.694143 | Closeness: 0.23863636 | Network: 8.333333  |
| PU       | Subgragh: 50.14162    | Degree: 7.0  | Eigenvector: 2.1539956E-4  | Information: 4.078461  | LAC: 3.142857  | Betweenness: 9.333333  | Closeness: 0.24915254 | Network: 7.0       |
| PSEN1    | Subgragh: 49802.414   | Degree: 10.0 | Eigenvector: 0.011045195   | Information: 4.7267814 | LAC: 5.2       | Betweenness: 1489.8735 | Closeness: 0.33333334 | Network: 6.2083335 |
| PRKG2    | Subgragh: 7886.028    | Degree: 10.0 | Eigenvector: 0.004205602   | Information: 4.7267814 | LAC: 4.0       | Betweenness: 293.62674 | Closeness: 0.27071825 | Network: 5.986111  |
| PRKG1    | Subgragh: 7886.028    | Degree: 10.0 | Eigenvector: 0.004205602   | Information: 4.7267814 | LAC: 4.0       | Betweenness: 293.62674 | Closeness: 0.27071825 | Network: 5.986111  |
| PRKAR2B  | Subgragh: 75163.56    | Degree: 11.0 | Eigenvector: 0.013537675   | Information: 4.8998713 | LAC: 7.4545455 | Betweenness: 66.12146  | Closeness: 0.26156583 | Network: 9.011111  |
| PRKAR2A  | Subgragh: 75163.56    | Degree: 11.0 | Eigenvector: 0.013537675   | Information: 4.8998713 | LAC: 7.4545455 | Betweenness: 66.12146  | Closeness: 0.26156583 | Network: 9.011111  |
| PRKAR1B  | Subgragh: 48654.85    | Degree: 10.0 | Eigenvector: 0.010850257   | Information: 4.7267814 | LAC: 7.2       | Betweenness: 38.44781  | Closeness: 0.25971732 | Network: 8.301587  |
| PRKAR1A  | Subgragh: 48654.85    | Degree: 10.0 | Eigenvector: 0.010850257   | Information: 4.7267814 | LAC: 7.2       | Betweenness: 38.44781  | Closeness: 0.25971732 | Network: 8.301587  |
| PRKACG   | Subgragh: 947111.5    | Degree: 15.0 | Eigenvector: 0.04861813    | Information: 5.4485474 | LAC: 7.2       | Betweenness: 722.616   | Closeness: 0.33870968 | Network: 10.069841 |
| PRKACB   | Subgragh: 947111.6    | Degree: 15.0 | Eigenvector: 0.048618134   | Information: 5.4485474 | LAC: 7.2       | Betweenness: 722.616   | Closeness: 0.33870968 | Network: 10.069841 |
| PRKACA   | Subgragh: 947111.5    | Degree: 15.0 | Eigenvector: 0.04861813    | Information: 5.4485474 | LAC: 7.2       | Betweenness: 722.616   | Closeness: 0.33870968 | Network: 10.069841 |
| PPP3CB   | Subgragh: 2436366.2   | Degree: 11.0 | Eigenvector: 0.078091055   | Information: 4.8998713 | LAC: 7.5454545 | Betweenness: 7.0653596 | Closeness: 0.27946767 | Network: 8.9       |
| PPP3CA   | Subgragh: 6763875.5   | Degree: 21.0 | Eigenvector: 0.13010082    | Information: 5.998078  | LAC: 10.095238 | Betweenness: 153.71782 | Closeness: 0.33182845 | Network: 14.072189 |
| PLN      | Subgragh: 148687.6    | Degree: 6.0  | Eigenvector: 0.019265676   | Information: 3.8050835 | LAC: 3.3333333 | Betweenness: 64.4666   | Closeness: 0.30184805 | Network: 4.8       |
| PLE      | Subgragh: 31.884657   | Degree: 4.0  | Eigenvector: 1.8948228E-4  | Information: 3.1330576 | LAC: 3.0       | Betweenness: 0.0       | Closeness: 0.24789207 | Network: 4.0       |
| PKP2     | Subgragh: 1109.8438   | Degree: 6.0  | Eigenvector: 3.0873663E-4  | Information: 3.8050835 | LAC: 4.3333335 | Betweenness: 1.0       | Closeness: 0.27222222 | Network: 5.2       |

|        |                       |              |                           |                        |                |                         |                       |                     |
|--------|-----------------------|--------------|---------------------------|------------------------|----------------|-------------------------|-----------------------|---------------------|
| PKIA   | Subgragh: 24641.607   | Degree: 5.0  | Eigenvector: 0.007784899  | Information: 3.4929101 | LAC: 1.6       | Betweenness: 36.298462  | Closeness: 0.25744307 | Network: 2.0        |
| PCD    | Subgragh: 37.85773    | Degree: 5.0  | Eigenvector: 1.9815318E-4 | Information: 3.4929106 | LAC: 3.2       | Betweenness: 1.3333334  | Closeness: 0.2483108  | Network: 5.0        |
| OCLN   | Subgragh: 2397.6755   | Degree: 9.0  | Eigenvector: 3.4593165E-4 | Information: 4.534564  | LAC: 5.7777777 | Betweenness: 89.35479   | Closeness: 0.27579737 | Network: 6.5        |
| NUMB   | Subgragh: 1571.4392   | Degree: 9.0  | Eigenvector: 0.0012054602 | Information: 4.534564  | LAC: 6.6666665 | Betweenness: 44.934574  | Closeness: 0.2658228  | Network: 7.839286   |
| NOTCH4 | Subgragh: 2980.1252   | Degree: 11.0 | Eigenvector: 0.0021594414 | Information: 4.8998713 | LAC: 7.090909  | Betweenness: 229.22473  | Closeness: 0.2859922  | Network: 9.841666   |
| NOTCH3 | Subgragh: 3369.3237   | Degree: 12.0 | Eigenvector: 0.0022225315 | Information: 5.056548  | LAC: 7.1666665 | Betweenness: 338.52066  | Closeness: 0.29817444 | Network: 10.414142  |
| NOTCH2 | Subgragh: 3369.3242   | Degree: 12.0 | Eigenvector: 0.0022225315 | Information: 5.056548  | LAC: 7.1666665 | Betweenness: 338.52066  | Closeness: 0.29817444 | Network: 10.414142  |
| NOTCH1 | Subgragh: 3369.3242   | Degree: 12.0 | Eigenvector: 0.0022225315 | Information: 5.056548  | LAC: 7.1666665 | Betweenness: 338.52066  | Closeness: 0.29817444 | Network: 10.414142  |
| NOS3   | Subgragh: 1.6134919E7 | Degree: 25.0 | Eigenvector: 0.20097198   | Information: 6.256977  | LAC: 14.24     | Betweenness: 151.52411  | Closeness: 0.3394919  | Network: 17.966318  |
| NOS2   | Subgragh: 1749140.0   | Degree: 8.0  | Eigenvector: 0.066165365  | Information: 4.3198524 | LAC: 5.5       | Betweenness: 1.0        | Closeness: 0.27893737 | Network: 6.285714   |
| MYO6   | Subgragh: 1420.0408   | Degree: 8.0  | Eigenvector: 3.3217313E-4 | Information: 4.3198524 | LAC: 5.0       | Betweenness: 18.480215  | Closeness: 0.27476636 | Network: 5.885714   |
| MRVI1  | Subgragh: 106.92905   | Degree: 2.0  | Eigenvector: 4.2298945E-4 | Information: 2.2187285 | LAC: 1.0       | Betweenness: 0.0        | Closeness: 0.21366279 | Network: 2.0        |
| MAPK3  | Subgragh: 3763.8364   | Degree: 12.0 | Eigenvector: 3.7976808E-4 | Information: 5.056548  | LAC: 7.1666665 | Betweenness: 189.07948  | Closeness: 0.2773585  | Network: 9.107575   |
| MAML1  | Subgragh: 562.3916    | Degree: 6.0  | Eigenvector: 5.287678E-4  | Information: 3.8050835 | LAC: 5.0       | Betweenness: 0.0        | Closeness: 0.2318612  | Network: 6.0        |
| LFNG   | Subgragh: 562.3916    | Degree: 6.0  | Eigenvector: 5.287678E-4  | Information: 3.8050835 | LAC: 5.0       | Betweenness: 0.0        | Closeness: 0.2318612  | Network: 6.0        |
| KRAS   | Subgragh: 2572.499    | Degree: 10.0 | Eigenvector: 1.917015E-4  | Information: 4.7267814 | LAC: 6.4       | Betweenness: 37.26822   | Closeness: 0.23863636 | Network: 7.698413   |
| KCNQ1  | Subgragh: 3949087.0   | Degree: 19.0 | Eigenvector: 0.09939127   | Information: 5.840981  | LAC: 6.5263157 | Betweenness: 273.42935  | Closeness: 0.33485195 | Network: 9.969048   |
| KCNJ3  | Subgragh: 45258.88    | Degree: 11.0 | Eigenvector: 0.0032306705 | Information: 4.8998713 | LAC: 6.5454545 | Betweenness: 5123.4834  | Closeness: 0.34186047 | Network: 7.2        |
| KCNH2  | Subgragh: 3661083.0   | Degree: 19.0 | Eigenvector: 0.09569581   | Information: 5.840981  | LAC: 8.0       | Betweenness: 1569.6685  | Closeness: 0.3868421  | Network: 13.832635  |
| KCNE4  | Subgragh: 872963.94   | Degree: 9.0  | Eigenvector: 0.046712097  | Information: 4.534564  | LAC: 6.888889  | Betweenness: 1.3160173  | Closeness: 0.3094737  | Network: 8.0        |
| KCNE3  | Subgragh: 1119027.5   | Degree: 11.0 | Eigenvector: 0.052885454  | Information: 4.8998713 | LAC: 7.2727275 | Betweenness: 7.2209845  | Closeness: 0.31477517 | Network: 8.7        |
| KCNE2  | Subgragh: 1147353.0   | Degree: 11.0 | Eigenvector: 0.053554904  | Information: 4.8998713 | LAC: 6.181818  | Betweenness: 9.714327   | Closeness: 0.31410256 | Network: 7.383333   |
| KCNE1L | Subgragh: 507006.88   | Degree: 7.0  | Eigenvector: 0.035596468  | Information: 4.078461  | LAC: 5.714286  | Betweenness: 0.36363637 | Closeness: 0.3081761  | Network: 6.6666665  |
| KCNE1  | Subgragh: 2214865.5   | Degree: 16.0 | Eigenvector: 0.07441355   | Information: 5.5583854 | LAC: 7.125     | Betweenness: 383.24084  | Closeness: 0.3325792  | Network: 9.327381   |
| KCNAB3 | Subgragh: 270446.44   | Degree: 5.0  | Eigenvector: 0.025997372  | Information: 3.4929101 | LAC: 2.4       | Betweenness: 0.6062271  | Closeness: 0.28767124 | Network: 3.0        |
| KCNAB2 | Subgragh: 300071.12   | Degree: 6.0  | Eigenvector: 0.027381862  | Information: 3.8050835 | LAC: 3.6666667 | Betweenness: 0.6062271  | Closeness: 0.2882353  | Network: 4.4        |
| KCNAB1 | Subgragh: 300071.12   | Degree: 6.0  | Eigenvector: 0.027381862  | Information: 3.8050835 | LAC: 3.6666667 | Betweenness: 0.6062271  | Closeness: 0.2882353  | Network: 4.4        |
| KCNA5  | Subgragh: 2099823.2   | Degree: 9.0  | Eigenvector: 0.07249222   | Information: 4.534564  | LAC: 4.6666665 | Betweenness: 8.1409     | Closeness: 0.31545064 | Network: 5.25       |
| KCNA4  | Subgragh: 3117122.5   | Degree: 13.0 | Eigenvector: 0.08832019   | Information: 5.199043  | LAC: 5.8461537 | Betweenness: 65.50372   | Closeness: 0.3181818  | Network: 7.4166665  |
| KCNA2  | Subgragh: 5533279.5   | Degree: 18.0 | Eigenvector: 0.11767032   | Information: 5.753736  | LAC: 8.888889  | Betweenness: 91.813446  | Closeness: 0.32166302 | Network: 12.1784315 |
| KCNA1  | Subgragh: 5140888.5   | Degree: 17.0 | Eigenvector: 0.11342248   | Information: 5.6598024 | LAC: 8.0       | Betweenness: 90.41516   | Closeness: 0.3209607  | Network: 10.2625    |
| KALRN  | Subgragh: 453841.8    | Degree: 5.0  | Eigenvector: 0.033703856  | Information: 3.4929101 | LAC: 4.0       | Betweenness: 0.0        | Closeness: 0.27579737 | Network: 5.0        |
| JUP    | Subgragh: 4267.0215   | Degree: 13.0 | Eigenvector: 4.084699E-4  | Information: 5.1990433 | LAC: 7.3846154 | Betweenness: 85.24523   | Closeness: 0.27788278 | Network: 9.882973   |
| ITPR3  | Subgragh: 421.51962   | Degree: 1.0  | Eigenvector: 0.001016006  | Information: 1.6256909 | LAC: 0.0       | Betweenness: 0.0        | Closeness: 0.26775956 | Network: 0.0        |
| HRAS1  | Subgragh: 3238.9348   | Degree: 12.0 | Eigenvector: 2.1206803E-4 | Information: 5.056548  | LAC: 6.5       | Betweenness: 70.89182   | Closeness: 0.23941368 | Network: 8.600361   |
| HN     | Subgragh: 31.88464    | Degree: 4.0  | Eigenvector: 1.8948226E-4 | Information: 3.1330576 | LAC: 3.0       | Betweenness: 0.0        | Closeness: 0.24789207 | Network: 4.0        |
| HEY1   | Subgragh: 833.76184   | Degree: 8.0  | Eigenvector: 6.1055785E-4 | Information: 4.319852  | LAC: 6.25      | Betweenness: 1.0        | Closeness: 0.23259494 | Network: 7.714286   |
| GNGT1  | Subgragh: 115765.13   | Degree: 16.0 | Eigenvector: 3.8719235E-4 | Information: 5.5583854 | LAC: 12.875    | Betweenness: 243.41962  | Closeness: 0.2658228  | Network: 15.646153  |
| GNG8   | Subgragh: 115765.13   | Degree: 16.0 | Eigenvector: 3.8719235E-4 | Information: 5.5583854 | LAC: 12.875    | Betweenness: 243.41962  | Closeness: 0.2658228  | Network: 15.646153  |
| GNG7   | Subgragh: 115765.13   | Degree: 16.0 | Eigenvector: 3.8719235E-4 | Information: 5.5583854 | LAC: 12.875    | Betweenness: 243.41962  | Closeness: 0.2658228  | Network: 15.646153  |
| GNG5   | Subgragh: 115765.13   | Degree: 16.0 | Eigenvector: 3.8719235E-4 | Information: 5.5583854 | LAC: 12.875    | Betweenness: 243.41962  | Closeness: 0.2658228  | Network: 15.646153  |
| GNG3   | Subgragh: 115765.13   | Degree: 16.0 | Eigenvector: 3.8719235E-4 | Information: 5.5583854 | LAC: 12.875    | Betweenness: 243.41962  | Closeness: 0.2658228  | Network: 15.646153  |
| GNG2   | Subgragh: 115765.13   | Degree: 16.0 | Eigenvector: 3.8719235E-4 | Information: 5.5583854 | LAC: 12.875    | Betweenness: 243.41962  | Closeness: 0.2658228  | Network: 15.646153  |
| GNB3   | Subgragh: 115765.13   | Degree: 16.0 | Eigenvector: 3.8719235E-4 | Information: 5.5583854 | LAC: 12.875    | Betweenness: 243.41962  | Closeness: 0.2658228  | Network: 15.646153  |
| GNB1   | Subgragh: 87105.516   | Degree: 13.0 | Eigenvector: 1.9927716E-4 | Information: 5.199043  | LAC: 12.0      | Betweenness: 0.0        | Closeness: 0.21491228 | Network: 13.0       |
| GNAZ   | Subgragh: 88794.266   | Degree: 14.0 | Eigenvector: 2.0068041E-4 | Information: 5.329195  | LAC: 11.285714 | Betweenness: 34.258373  | Closeness: 0.21617647 | Network: 12.557693  |
| GNAT2  | Subgragh: 87105.52    | Degree: 13.0 | Eigenvector: 1.9927716E-4 | Information: 5.199043  | LAC: 12.0      | Betweenness: 0.0        | Closeness: 0.21491228 | Network: 13.0       |
| GNAT1  | Subgragh: 87105.52    | Degree: 13.0 | Eigenvector: 1.9927716E-4 | Information: 5.199043  | LAC: 12.0      | Betweenness: 0.0        | Closeness: 0.21491228 | Network: 13.0       |
| GNA01  | Subgragh: 88794.266   | Degree: 14.0 | Eigenvector: 2.0068041E-4 | Information: 5.329195  | LAC: 11.285714 | Betweenness: 34.258373  | Closeness: 0.21617647 | Network: 12.557693  |
| GNAI2  | Subgragh: 106893.1    | Degree: 15.0 | Eigenvector: 2.3181389E-4 | Information: 5.4485474 | LAC: 12.666667 | Betweenness: 2.6432748  | Closeness: 0.21554253 | Network: 14.646153  |
| GNAI1  | Subgragh: 106893.07   | Degree: 15.0 | Eigenvector: 2.3181389E-4 | Information: 5.4485474 | LAC: 12.666667 | Betweenness: 2.6432748  | Closeness: 0.21554253 | Network: 14.646153  |
| GJA1   | Subgragh: 8264.481    | Degree: 14.0 | Eigenvector: 0.0033266202 | Information: 5.329195  | LAC: 6.428571  | Betweenness: 3844.0962  | Closeness: 0.35083532 | Network: 9.509058   |
| GABBR2 | Subgragh: 59275.375   | Degree: 11.0 | Eigenvector: 3.396352E-4  | Information: 4.8998713 | LAC: 9.636364  | Betweenness: 57.252525  | Closeness: 0.26296958 | Network: 10.6       |
| GABBR1 | Subgragh: 59275.375   | Degree: 11.0 | Eigenvector: 3.396352E-4  | Information: 4.8998713 | LAC: 9.636364  | Betweenness: 57.252525  | Closeness: 0.26296958 | Network: 10.6       |

|          |                       |              |                            |                        |                |                        |                       |                    |
|----------|-----------------------|--------------|----------------------------|------------------------|----------------|------------------------|-----------------------|--------------------|
| FKBP1B   | Subgragh: 3077325.2   | Degree: 18.0 | Eigenvector: 0.08773326    | Information: 5.753736  | LAC: 8.0       | Betweenness: 363.59512 | Closeness: 0.34186047 | Network: 13.009923 |
| FGF12    | Subgragh: 1986759.8   | Degree: 7.0  | Eigenvector: 0.07052335    | Information: 4.078461  | LAC: 4.285714  | Betweenness: 3.893985  | Closeness: 0.31144068 | Network: 5.0       |
| ENSCPOG0 | Subgragh: 1.0517248E7 | Degree: 19.0 | Eigenvector: 0.1622583     | Information: 5.8409815 | LAC: 12.631579 | Betweenness: 129.00198 | Closeness: 0.3195652  | Network: 14.723077 |
| DYSF     | Subgragh: 1.9637932   | Degree: 1.0  | Eigenvector: 2.8053699E-5  | Information: 1.6256909 | LAC: 0.0       | Betweenness: 0.0       | Closeness: 0.20792079 | Network: 0.0       |
| DTX1     | Subgragh: 1114.6998   | Degree: 7.0  | Eigenvector: 0.0011137608  | Information: 4.078461  | LAC: 6.0       | Betweenness: 0.0       | Closeness: 0.25565216 | Network: 7.0       |
| DNM2     | Subgragh: 2740.5774   | Degree: 12.0 | Eigenvector: 3.6690632E-4  | Information: 5.056548  | LAC: 6.1666665 | Betweenness: 220.37039 | Closeness: 0.2773585  | Network: 8.783549  |
| DNM1     | Subgragh: 3214.8662   | Degree: 13.0 | Eigenvector: 3.766095E-4   | Information: 5.1990433 | LAC: 6.3076925 | Betweenness: 252.23557 | Closeness: 0.27788278 | Network: 9.387085  |
| DHPR     | Subgragh: 3993.0642   | Degree: 11.0 | Eigenvector: 0.0031435103  | Information: 4.8998713 | LAC: 2.0       | Betweenness: 2797.3333 | Closeness: 0.32666665 | Network: 7.0       |
| CTNNB1   | Subgragh: 6844.1094   | Degree: 19.0 | Eigenvector: 0.0013287772  | Information: 5.8409815 | LAC: 7.1578946 | Betweenness: 1289.7253 | Closeness: 0.30309278 | Network: 13.742354 |
| CLTC     | Subgragh: 648.6563    | Degree: 7.0  | Eigenvector: 8.8033616E-5  | Information: 4.078461  | LAC: 4.285714  | Betweenness: 4.6666665 | Closeness: 0.22138554 | Network: 5.0       |
| CLTA     | Subgragh: 909.60785   | Degree: 8.0  | Eigenvector: 2.4727712E-4  | Information: 4.3198524 | LAC: 5.5       | Betweenness: 142.33772 | Closeness: 0.26630434 | Network: 6.5238094 |
| CG3603   | Subgragh: 12.946825   | Degree: 1.0  | Eigenvector: 1.5892624E-4  | Information: 1.6256909 | LAC: 0.0       | Betweenness: 0.0       | Closeness: 0.24664429 | Network: 0.0       |
| CG12116  | Subgragh: 22.947414   | Degree: 3.0  | Eigenvector: 1.7890391E-4  | Information: 2.7136943 | LAC: 2.0       | Betweenness: 0.0       | Closeness: 0.24747474 | Network: 3.0       |
| CDH2     | Subgragh: 3406.994    | Degree: 11.0 | Eigenvector: 3.752259E-4   | Information: 4.8998713 | LAC: 7.818182  | Betweenness: 75.21795  | Closeness: 0.27683616 | Network: 9.330556  |
| CAV3     | Subgragh: 131.21785   | Degree: 2.0  | Eigenvector: 5.5654056E-4  | Information: 2.2187285 | LAC: 0.0       | Betweenness: 292.0     | Closeness: 0.2620321  | Network: 0.0       |
| CASQ2    | Subgragh: 585340.56   | Degree: 8.0  | Eigenvector: 0.03825732    | Information: 4.3198524 | LAC: 5.75      | Betweenness: 20.761045 | Closeness: 0.3245033  | Network: 6.714286  |
| CALM2    | Subgragh: 6666662.5   | Degree: 16.0 | Eigenvector: 0.12917565    | Information: 5.5583854 | LAC: 10.375    | Betweenness: 47.59109  | Closeness: 0.33333334 | Network: 10.851082 |
| CAMK2D   | Subgragh: 1.1205029E7 | Degree: 20.0 | Eigenvector: 0.16747928    | Information: 5.9222302 | LAC: 13.9      | Betweenness: 23.00488  | Closeness: 0.318872   | Network: 15.088343 |
| CAMK2B   | Subgragh: 1.7749196E7 | Degree: 27.0 | Eigenvector: 0.21078438    | Information: 6.36491   | LAC: 14.740741 | Betweenness: 133.42503 | Closeness: 0.34106728 | Network: 19.831997 |
| CAMK2A   | Subgragh: 3.1768708E7 | Degree: 46.0 | Eigenvector: 0.28200343    | Information: 6.9994287 | LAC: 13.695652 | Betweenness: 1833.6877 | Closeness: 0.37595907 | Network: 36.7912   |
| CALML6   | Subgragh: 5286932.5   | Degree: 14.0 | Eigenvector: 0.11503584    | Information: 5.329195  | LAC: 9.571428  | Betweenness: 17.514671 | Closeness: 0.30625    | Network: 10.346765 |
| CALML5   | Subgragh: 5286932.5   | Degree: 14.0 | Eigenvector: 0.11503584    | Information: 5.329195  | LAC: 9.571428  | Betweenness: 17.514671 | Closeness: 0.30625    | Network: 10.346765 |
| CALML3   | Subgragh: 5286932.5   | Degree: 14.0 | Eigenvector: 0.11503584    | Information: 5.329195  | LAC: 9.571428  | Betweenness: 17.514671 | Closeness: 0.30625    | Network: 10.346765 |
| CALM3    | Subgragh: 6553722.5   | Degree: 16.0 | Eigenvector: 0.1280786     | Information: 5.5583854 | LAC: 8.5       | Betweenness: 40.35117  | Closeness: 0.3081761  | Network: 9.614862  |
| CAMK2G   | Subgragh: 2.7757722E7 | Degree: 42.0 | Eigenvector: 0.26360258    | Information: 6.9050612 | LAC: 12.904762 | Betweenness: 1983.0173 | Closeness: 0.37309644 | Network: 30.45621  |
| CALM1    | Subgragh: 1.0691622E7 | Degree: 23.0 | Eigenvector: 0.16358083    | Information: 6.1355953 | LAC: 12.0      | Betweenness: 102.26587 | Closeness: 0.33870968 | Network: 17.070618 |
| CACNA1S  | Subgragh: 100023.67   | Degree: 4.0  | Eigenvector: 0.015801962   | Information: 3.1330576 | LAC: 3.0       | Betweenness: 0.0       | Closeness: 0.3006135  | Network: 4.0       |
| CACNA1D  | Subgragh: 2245365.5   | Degree: 12.0 | Eigenvector: 0.074946664   | Information: 5.056548  | LAC: 8.0       | Betweenness: 30.625074 | Closeness: 0.32594234 | Network: 9.172619  |
| CACNA1C  | Subgragh: 2441499.2   | Degree: 13.0 | Eigenvector: 0.07814964    | Information: 5.199043  | LAC: 8.461538  | Betweenness: 32.11317  | Closeness: 0.32666665 | Network: 10.076839 |
| CACNA1A  | Subgragh: 1782917.5   | Degree: 10.0 | Eigenvector: 0.06679289    | Information: 4.7267814 | LAC: 5.4       | Betweenness: 19.079866 | Closeness: 0.3012295  | Network: 6.0277777 |
| BCAR1    | Subgragh: 705.79974   | Degree: 5.0  | Eigenvector: 6.912282E-5   | Information: 3.4929106 | LAC: 4.0       | Betweenness: 0.0       | Closeness: 0.21973094 | Network: 5.0       |
| ATP2A1   | Subgragh: 163617.88   | Degree: 12.0 | Eigenvector: 0.02019249    | Information: 5.056548  | LAC: 2.8333333 | Betweenness: 2260.6877 | Closeness: 0.36476427 | Network: 5.190909  |
| ASPH     | Subgragh: 420553.8    | Degree: 9.0  | Eigenvector: 0.03240384    | Information: 4.534564  | LAC: 5.5555553 | Betweenness: 9.890683  | Closeness: 0.2987805  | Network: 6.607143  |
| AP2S1    | Subgragh: 682.4279    | Degree: 7.0  | Eigenvector: 8.156701E-5   | Information: 4.078461  | LAC: 4.571429  | Betweenness: 3.8675325 | Closeness: 0.22171946 | Network: 5.3333335 |
| AP2M1    | Subgragh: 909.60785   | Degree: 8.0  | Eigenvector: 2.4727712E-4  | Information: 4.3198524 | LAC: 5.5       | Betweenness: 142.33772 | Closeness: 0.26630434 | Network: 6.5238094 |
| AP2B1    | Subgragh: 912.96704   | Degree: 8.0  | Eigenvector: 9.0619804E-5  | Information: 4.3198524 | LAC: 4.25      | Betweenness: 12.182684 | Closeness: 0.22205438 | Network: 5.1190476 |
| AKAP9    | Subgragh: 1251024.5   | Degree: 13.0 | Eigenvector: 0.05590674    | Information: 5.1990433 | LAC: 6.923077  | Betweenness: 262.2608  | Closeness: 0.3325792  | Network: 8.114285  |
| AKAP6    | Subgragh: 244482.52   | Degree: 7.0  | Eigenvector: 0.02470182    | Information: 4.078461  | LAC: 5.714286  | Betweenness: 0.25      | Closeness: 0.2945892  | Network: 6.6666665 |
| AKAP1    | Subgragh: 65148.277   | Degree: 8.0  | Eigenvector: 0.012643386   | Information: 4.3198524 | LAC: 6.5       | Betweenness: 1.4888889 | Closeness: 0.25925925 | Network: 7.428571  |
| ADE3     | Subgragh: 12.946826   | Degree: 1.0  | Eigenvector: 1.5892624E-4  | Information: 1.6256909 | LAC: 0.0       | Betweenness: 0.0       | Closeness: 0.24664429 | Network: 0.0       |
| ADCY8    | Subgragh: 43295.93    | Degree: 9.0  | Eigenvector: 0.010243264   | Information: 4.534564  | LAC: 6.6666665 | Betweenness: 36.298462 | Closeness: 0.25925925 | Network: 7.5       |
| ACLY     | Subgragh: 26.816294   | Degree: 3.0  | Eigenvector: 1.03786915E-5 | Information: 2.7136943 | LAC: 2.0       | Betweenness: 0.0       | Closeness: 0.20851064 | Network: 3.0       |
