# Supplementary material for: A Comprehensive In Silico Method to Study the QSTR of the Aconitine Alkaloids for Designing Novel Drugs
Source: MDPI journal article supplement (doi:10.3390/molecules23092385), 2018-09-18
Supplement: s1 [file s1]

**Table S2.** The dock result of the Aconitine alkaloids to the protein 2V70 and 2VZ6.

| ligand | receptor | rseq | mseq | S | rmsd     | refiFP:PLIF | PLIF    | ligidx                                                              | E conf   | E place  | E score1 | E refine | E score2 |
|--------|----------|------|------|---|----------|-------------|---------|---------------------------------------------------------------------|----------|----------|----------|----------|----------|
| 1      | 2V70     |      | 1    | 1 | -9.03862 | 2.427852    | 10      | [[4, 11, 26, 40, 47, 48, 58, 60, 90, 91]]                           | 227.2475 | -96.5353 | -7.34918 | -37.8371 | -9.03862 |
| 1      | 2V70     |      | 1    | 1 | -8.84172 | 2.149052    | 10      | [[4, 26, 28, 40, 47, 48, 58, 60, 90, 91]]                           | 235.1082 | -91.3857 | -6.34467 | -39.3511 | -8.84172 |
| 1      | 2V70     |      | 1    | 1 | -8.54948 | 2.044616    | 29 32   | [9, 9]                                                              | 251.7127 | -51.1315 | -6.93746 | -37.4023 | -8.54948 |
| 1      | 2V70     |      | 1    | 1 | -8.35709 | 3.198298    |         | []                                                                  | 227.0408 | -81.6554 | -6.55824 | -33.1959 | -8.35709 |
| 1      | 2V70     |      | 1    | 1 | -7.95816 | 2.816367    | 10      | [[1, 6, 13, 29, 42, 49, 55, 61, 86, 96]]                            | 260.9932 | -85.0802 | -6.6492  | -25.6133 | -7.95816 |
| 2      | 2V70     |      | 1    | 2 | -7.06671 | 1.777539    |         | []                                                                  | 79.98949 | -81.3195 | -8.28233 | -29.8395 | -7.06671 |
| 2      | 2V70     |      | 1    | 2 | -6.99717 | 3.432195    |         | []                                                                  | 82.13496 | -90.6506 | -7.70791 | -30.4801 | -6.99717 |
| 2      | 2V70     |      | 1    | 2 | -6.93976 | 1.985647    | 2 3 6 7 | [35, 35, 10, 10]                                                    | 77.88571 | -92.5891 | -8.8053  | -35.9428 | -6.93976 |
| 2      | 2V70     |      | 1    | 2 | -6.67518 | 1.70978     | 9 23    | [35, 35]                                                            | 75.39453 | -89.7905 | -8.51903 | -32.0996 | -6.67518 |
| 2      | 2V70     |      | 1    | 2 | -6.63468 | 2.031292    |         | []                                                                  | 98.23914 | -95.4309 | -7.72429 | -25.6541 | -6.63468 |
| 3      | 2V70     |      | 1    | 3 | -8.70672 | 2.243983    | 6 10    | [27, [4, 5, 12, 19, 21, 22, 44, 70, 71, 73]]                        | 494.3481 | -56.1207 | -8.13103 | -46.4695 | -8.70672 |
| 3      | 2V70     |      | 1    | 3 | -8.05286 | 1.90219     | 8 10    | [[10, 19, 12, 22, 21, 11], [5, 12, 21, 22, 44, 73, 74, 88, 11, 19]] | 492.4698 | -85.2657 | -8.12601 | -46.1814 | -8.05286 |
| 3      | 2V70     |      | 1    | 3 | -7.89897 | 1.700932    | 10      | [[4, 10, 11, 19, 21, 43, 69, 86, 87, 12]]                           | 492.0929 | -100.38  | -8.28189 | -39.0053 | -7.89897 |
| 3      | 2V70     |      | 1    | 3 | -7.87525 | 1.87171     | 4 5     | [41, 41]                                                            | 466.7637 | -75.9928 | -8.66042 | -45.0922 | -7.87525 |
| 3      | 2V70     |      | 1    | 3 | -7.87323 | 2.187611    |         | []                                                                  | 486.8844 | -64.5875 | -7.85279 | -40.9596 | -7.87323 |
| 4      | 2V70     |      | 1    | 4 | -7.3243  | 1.692895    | 10      | [[2, 6, 7, 14, 16, 22, 28, 31, 34, 38]]                             | 758.7833 | -86.7292 | -8.22968 | -25.7939 | -7.3243  |
| 4      | 2V70     |      | 1    | 4 | -6.92389 | 1.296806    |         | []                                                                  | 749.9845 | -99.7506 | -8.97979 | -30.2124 | -6.92389 |
| 4      | 2V70     |      | 1    | 4 | -6.83269 | 1.641392    | 10      | [[8, 17, 23, 24, 30, 33, 56, 57, 58, 67]]                           | 753.2866 | -85.2242 | -8.24302 | -27.5488 | -6.83269 |
| 4      | 2V70     |      | 1    | 4 | -6.74276 | 2.185868    | 10      | [[8, 17, 23, 24, 30, 33, 56, 57, 58, 67]]                           | 749.7653 | -80.5765 | -9.42271 | -27.6563 | -6.74276 |
| 4      | 2V70     |      | 1    | 4 | -6.71816 | 2.597223    | 2 3     | [22, 22]                                                            | 768.7506 | -98.2124 | -8.92557 | -19.9417 | -6.71816 |
| 5      | 2V70     |      | 1    | 5 | -8.55681 | 2.279317    |         | []                                                                  | 156.9359 | -96.4442 | -8.43496 | -29.348  | -8.55681 |
| 5      | 2V70     |      | 1    | 5 | -7.99676 | 1.698724    | 9 10    | [24, [2, 6, 7, 15, 16, 17, 24, 31, 46, 47]]                         | 169.0559 | -75.719  | -8.40465 | -33.1127 | -7.99676 |

|        |   |                              |                               |                                                 |
|--------|---|------------------------------|-------------------------------|-------------------------------------------------|
| 5 2V70 | 1 | 5 -7.89047 3.210677          | []                            | 176.2225 -115.269 -9.42816 -30.3467 -7.89047    |
| 5 2V70 | 1 | 5 -7.87579 2.431977          | []                            | 152.9026 -88.6273 -8.5056 -36.3366 -7.87579     |
| 5 2V70 | 1 | 5 -7.69998 1.396457          | []                            | 150.7074 -95.7147 -8.76545 -21.5775 -7.69998    |
| 5 2V70 | 1 | 5 -7.59413 1.447709          | []                            | 148.8331 -97.4109 -9.94235 -20.3189 -7.59413    |
|        |   |                              | [39, 39, [38, 42, 44, 45, 4   |                                                 |
| 5 2V70 | 1 | 5 -7.58224 2.157373 2 3 16   | 173, 41], [38, 42, 44, 45, 43 | 135.1118 -75.3251 -8.23534 -42.8821 -7.58224    |
|        |   |                              | , 41]]                        |                                                 |
| 5 2V70 | 1 | 5 -7.28864 1.541547          | 9                             | 30 163.9472 -103.25 -10.2749 -20.5326 -7.28864  |
| 5 2V70 | 1 | 5 -7.07434 1.3035            | []                            | 146.0965 -107.233 -8.63068 -26.934 -7.07434     |
| 5 2V70 | 1 | 5 -6.91388 2.795189          | []                            | 149.4369 -88.2537 -8.44082 -26.8545 -6.91388    |
| 6 2V70 | 1 | 6 -8.97547 1.607837          | 10                            | [[3, 6, 8, 11, 17, 19, 21, 2                    |
|        |   |                              | 5, 30, 34]]                   | 171.9381 -94.2011 -9.03963 -35.2364 -8.97547    |
| 6 2V70 | 1 | 6 -8.07966 1.976699 20 21    | [[42, 47, 46, 45, 44, 43],    | 191.2277 -74.6032 -8.31176 -30.3711 -8.07966    |
|        |   |                              | [42, 47, 46, 45, 44, 43]]     |                                                 |
| 6 2V70 | 1 | 6 -7.86863 2.677291          | []                            | 186.0519 -113.068 -8.18683 -33.7544 -7.86863    |
| 6 2V70 | 1 | 6 -7.53892 1.143091          | []                            | 159.8065 -91.9628 -8.15141 -35.1847 -7.53892    |
| 6 2V70 | 1 | 6 -7.53091 1.967047          | 9                             | 41 152.4483 -82.1281 -8.38087 -35.4636 -7.53091 |
| 7 2V70 | 1 | 7 -8.04035 1.890098          | 24                            | [[79, 81, 9, 11, 8, 30, 39,                     |
|        |   |                              | 18, 40, 56]]                  | 559.524 -101.218 -7.95172 -17.7824 -8.04035     |
| 7 2V70 | 1 | 7 -7.94456 1.528403 25 26 11 | [37, 37, 40, [11, 18, 30, 3   | 529.8604 -91.9587 -9.20801 -32.0065 -7.94456    |
|        |   |                              | 9, 40, 56, 81, 93, 9, 45]]    |                                                 |
| 7 2V70 | 1 | 7 -7.44615 1.568086 4 5 10   | [40, 40, [11, 39, 81, 9, 18   | 519.4249 -86.0193 -7.92431 -38.3406 -7.44615    |
|        |   |                              | , 30, 79, 4, 42, 56]]         |                                                 |
| 7 2V70 | 1 | 7 -7.18605 1.520319 18 25 11 | [43, 37, 40, 40, [8, 9, 10,   | 602.0568 -117.606 -8.44204 -28.0799 -7.18605    |
|        |   |                              | 11, 12, 18, 28, 30, 40, 45]   |                                                 |
|        |   |                              | , [8, 10, 12, 18, 11, 9]]     |                                                 |
|        |   |                              | [38, 38, 38, [8, 10, 12, 18   |                                                 |
| 7 2V70 | 1 | 7 -7.17983 1.735773 2 3 6 16 | , 11, 9], [8, 10, 12, 18, 11  | 532.119 -81.6785 -8.81142 -37.762 -7.17983      |
|        |   |                              | , 9]]                         |                                                 |
| 8 2V70 | 1 | 8 -8.4111 1.821191 15 41     | [38, 38]                      | 328.8668 -81.3038 -8.31616 -37.6118 -8.4111     |
| 8 2V70 | 1 | 8 -8.19024 2.822495 9 23     | [41, 41]                      | 445.2945 -99.2971 -8.3298 -28.0126 -8.19024     |
| 8 2V70 | 1 | 8 -7.61978 2.550316          | 22                            | [[16, 16, 16, 16, 16, 16]]                      |
| 8 2V70 | 1 | 8 -7.30536 1.769909          | 15                            | 36 455.5769 -80.6875 -8.48862 -37.9832 -7.30536 |

|         |   |                                |                                                                                                             |                                                 |
|---------|---|--------------------------------|-------------------------------------------------------------------------------------------------------------|-------------------------------------------------|
| 8 2V70  | 1 | 8 -7.29592 1.620976 29 20 6    | [38, [7, 9, 11, 18, 10, 8],<br>36, 36, [23, 41, 48, 49, 60<br>, 84, 86, 2, 5, 15]]                          | 462.3796 -72.8994 -9.0467 -30.5946 -7.29592     |
| 9 2V70  | 1 | 9 -8.08291 1.506813 10 16      | [[9, 10, 11, 12, 13, 21, 82<br>, 83, 85, 92], [9, 11, 13, 2<br>1, 12, 10]]                                  | 473.2804 -74.0305 -7.9291 -32.1872 -8.08291     |
| 9 2V70  | 1 | 9 -8.01173 3.20686             | []                                                                                                          | 452.8512 -78.8528 -8.55623 -37.1598 -8.01173    |
| 9 2V70  | 1 | 9 -7.87342 1.683797 37 38 11   | [43, 43, 41, 41, [9, 10, 11<br>, 12, 13, 21, 32, 41, 47, 82<br>]]                                           | 483.3424 -77.6858 -9.06076 -44.6757 -7.87342    |
| 9 2V70  | 1 | 9 -7.77818 1.286089            | []                                                                                                          | 471.2479 -59.3281 -8.45595 -31.2031 -7.77818    |
| 9 2V70  | 1 | 9 -7.52555 2.214701            | []                                                                                                          | 480.3321 -77.5314 -7.92495 -31.008 -7.52555     |
| 10 2V70 | 1 | 10 -7.53951 2.115426 35        |                                                                                                             | 11 363.5805 -72.032 -8.87387 -39.9745 -7.53951  |
| 10 2V70 | 1 | 10 -7.30426 3.104195 35 10     | [11, [9, 27, 59, 62, 64, 7,<br>19, 29, 30, 37]]                                                             | 354.5447 -83.8742 -9.2447 -36.6144 -7.30426     |
| 10 2V70 | 1 | 10 -7.27337 2.372484           | []                                                                                                          | 402.1701 -90.6637 -8.95859 -33.8326 -7.27337    |
| 10 2V70 | 1 | 10 -7.16903 4.104233 6 7       | [6, 6]                                                                                                      | 371.8395 -84.1 -10.128 -31.9548 -7.16903        |
| 10 2V70 | 1 | 10 -7.02567 2.850243 6 10      | [31, [6, 26, 49, 51, 61, 79<br>, 1, 86, 53, 2]]                                                             | 362.5105 -86.0778 -9.05418 -29.5092 -7.02567    |
| 12 2V70 | 1 | 12 -8.83127 2.545199 13        | [[30, 32, 34, 35, 33, 31]]                                                                                  | 529.9581 -104.77 -9.56623 -44.6852 -8.83127     |
| 12 2V70 | 1 | 12 -8.47186 3.140958 22 31 6 1 | [[27, 27, 27, 27, 27, 27],<br>[27, 27, 27, 27, 27, 27], 2<br>5, [5, 26, 27, 28, 45, 70, 7<br>1, 72, 92, 4]] | 951.5167 -98.0523 -10.3129 -42.504 -8.47186     |
| 12 2V70 | 1 | 12 -8.37121 4.020075 29        |                                                                                                             | 48 330.2833 -70.6992 -8.71804 -48.8549 -8.37121 |
| 12 2V70 | 1 | 12 -8.30504 3.428274 29 32 22  | [6, 6, [27, 27, 27, 27, 27,<br>27]]                                                                         | 432.0944 -101.211 -8.39253 -48.1546 -8.30504    |
| 12 2V70 | 1 | 12 -8.18209 5.11342 6 10       | [25, [5, 30, 31, 32, 33, 34<br>, 35, 75, 76, 4]]                                                            | 951.0066 -78.667 -8.40753 -46.5879 -8.18209     |
| 13 2V70 | 1 | 13 -8.27453 1.972244 9         |                                                                                                             | 24 104.6532 -73.2689 -8.96562 -47.0989 -8.27453 |
| 13 2V70 | 1 | 13 -7.98081 2.012662 2 3       | [39, 39]                                                                                                    | 124.7611 -80.523 -8.25308 -33.1728 -7.98081     |
| 13 2V70 | 1 | 13 -7.69105 1.771878 33 34     | [[42, 46, 48, 49, 47, 45],<br>[42, 46, 48, 49, 47, 45]]                                                     | 107.994 -67.2324 -8.50867 -46.0397 -7.69105     |
| 13 2V70 | 1 | 13 -7.67838 1.453738           | []                                                                                                          | 107.4603 -103.903 -8.80725 -43.2507 -7.67838    |

|         |   |    |          |          |          |                                                                                   |          |          |          |          |          |
|---------|---|----|----------|----------|----------|-----------------------------------------------------------------------------------|----------|----------|----------|----------|----------|
| 13 2V70 | 1 | 13 | -7.56053 | 2.581646 | 1        | [[42, 46, 48, 49, 47, 45, 42, 46, 48, 49, 47, 45]]                                | 90.42992 | -101.34  | -10.0859 | -42.683  | -7.56053 |
| 14 2V70 | 1 | 14 | -8.50253 | 2.021634 | 10 27 28 | [[27, 28, 31, 34, 37, 38, 39, 40, 42, 43], 46, 46]                                | 172.1957 | -96.3716 | -9.81493 | -28.1329 | -8.50253 |
| 14 2V70 | 1 | 14 | -8.22888 | 1.984356 | 29 30 6  | [13, [34, 38, 41, 44, 40, 377], 15, 15, [35, 43, 45, 47, 49, 96, 97, 98, 99, 31]] | 161.7405 | -79.6915 | -9.11426 | -47.5047 | -8.22888 |
| 14 2V70 | 1 | 14 | -8.16614 | 1.718532 |          | []                                                                                | 151.9247 | -65.8207 | -9.226   | -41.5291 | -8.16614 |
| 14 2V70 | 1 | 14 | -8.04381 | 2.373407 | 9 23     | [33, 33]                                                                          | 162.3895 | -81.1548 | -9.4899  | -30.3152 | -8.04381 |
| 14 2V70 | 1 | 14 | -7.86271 | 1.472629 |          | []                                                                                | 165.9002 | -99.0918 | -9.21577 | -31.58   | -7.86271 |
| 15 2V70 | 1 | 15 | -8.41091 | 2.876873 |          | []                                                                                | 433.0884 | -69.3985 | -8.10522 | -36.6378 | -8.41091 |
| 15 2V70 | 1 | 15 | -7.91762 | 2.267237 |          | []                                                                                | 427.4212 | -69.5576 | -7.10369 | -28.6541 | -7.91762 |
| 15 2V70 | 1 | 15 | -7.4637  | 1.556922 | 29 2 10  | [45, 40, [66, 83, 2, 8, 65, 84, 85, 20, 67, 18]]                                  | 404.7519 | -65.325  | -7.8716  | -39.3662 | -7.4637  |
| 15 2V70 | 1 | 15 | -7.45385 | 2.351712 |          | []                                                                                | 329.5383 | -44.5559 | -7.09636 | -35.7961 | -7.45385 |
| 15 2V70 | 1 | 15 | -7.4209  | 1.765784 | 29 32 2  | [42, 42, 41, 41]                                                                  | 457.5509 | -103.435 | -9.16302 | -34.8332 | -7.4209  |
| 16 2V70 | 1 | 16 | -8.82691 | 1.299715 | 10       | [[8, 19, 28, 33, 35, 36, 38, 39, 41, 44]]                                         | 186.1039 | -64.1526 | -8.63153 | -31.8731 | -8.82691 |
| 16 2V70 | 1 | 16 | -7.48055 | 2.47845  | 1        | [[35, 39, 41, 42, 40, 38]]                                                        | 186.6794 | -84.6528 | -8.96437 | -33.5396 | -7.48055 |
| 16 2V70 | 1 | 16 | -7.40497 | 1.997007 | 10       | [[25, 38, 40, 42, 67, 68, 69, 81, 83, 85]]                                        | 178.8833 | -95.6132 | -9.19327 | -27.2052 | -7.40497 |
| 16 2V70 | 1 | 16 | -7.39196 | 2.61204  |          | []                                                                                | 191.1956 | -114.432 | -8.69949 | -26.9069 | -7.39196 |
| 16 2V70 | 1 | 16 | -7.1443  | 3.35688  |          | []                                                                                | 161.0556 | -65.7955 | -8.63205 | -40.9027 | -7.1443  |
| 17 2V70 | 1 | 17 | -7.87267 | 2.088966 | 4 5 10   | [28, 28, [3, 9, 13, 18, 20, 29, 48, 57, 60, 63]]                                  | 200.8252 | -132.348 | -9.80888 | -28.9656 | -7.87267 |
| 17 2V70 | 1 | 17 | -7.7856  | 2.282742 | 9        |                                                                                   | 214.8013 | -82.6065 | -8.32556 | -18.3469 | -7.7856  |
| 17 2V70 | 1 | 17 | -7.61849 | 2.41147  |          | []                                                                                | 152.127  | -64.0278 | -8.38861 | -36.5608 | -7.61849 |
| 17 2V70 | 1 | 17 | -7.34475 | 1.699139 | 1        | [[40, 44, 46, 47, 45, 43]]                                                        | 162.6613 | -68.9205 | -10.1884 | -36.4417 | -7.34475 |
| 17 2V70 | 1 | 17 | -7.32761 | 2.471305 | 11 9 23  | [16, 30, 30]                                                                      | 224.9754 | -57.4959 | -8.26337 | -22.1522 | -7.32761 |
| 18 2V70 | 1 | 18 | -7.84931 | 2.04398  | 10       | [[34, 38, 83, 37, 85, 92, 70, 27, 84, 10]]                                        | 117.4876 | -73.2558 | -8.58161 | -37.451  | -7.84931 |
| 18 2V70 | 1 | 18 | -7.66074 | 1.311189 |          | []                                                                                | 123.6084 | -88.6489 | -9.74787 | -36.1444 | -7.66074 |
| 18 2V70 | 1 | 18 | -7.57153 | 1.393964 |          | []                                                                                | 264.4735 | -88.8796 | -8.70142 | -33.8187 | -7.57153 |
| 18 2V70 | 1 | 18 | -7.36085 | 1.487717 |          | []                                                                                | 119.0508 | -77.2857 | -8.26327 | -36.8878 | -7.36085 |

|         |   |                                |                                                                                                      |                                                 |
|---------|---|--------------------------------|------------------------------------------------------------------------------------------------------|-------------------------------------------------|
| 18 2V70 | 1 | 18 -7.33275 1.338224 9 23 10   | [17, 17, [2, 7, 10, 17, 25, 27, 34, 47, 49, 53]]                                                     | 142.435 -85.0244 -8.90031 -3.06561 -7.33275     |
| 19 2V70 | 1 | 19 -7.53199 2.255959           | []                                                                                                   | 290.0166 -75.3791 -6.91524 -28.098 -7.53199     |
| 19 2V70 | 1 | 19 -7.14192 1.653783           | []                                                                                                   | 326.5758 -85.9072 -6.85281 -15.2005 -7.14192    |
| 19 2V70 | 1 | 19 -7.10606 2.543881           | []                                                                                                   | 278.2257 -66.9209 -6.96973 -30.4902 -7.10606    |
| 19 2V70 | 1 | 19 -7.05676 1.969371           | 9                                                                                                    | 35 278.9125 -62.073 -6.97259 -26.5885 -7.05676  |
| 19 2V70 | 1 | 19 -7.04228 2.205437 37 38     | [37, 37]                                                                                             | 340.7403 -71.5247 -6.91109 -20.2113 -7.04228    |
| 20 2V70 | 1 | 20 -9.36105 3.345224 36 37 38  | [49, 13, 13, 28]                                                                                     | 674.705 -58.7291 -6.13741 -53.64 -9.36105       |
| 20 2V70 | 1 | 20 -9.32166 3.831885 2 37 38   | [12, 13, 13]                                                                                         | 701.945 -94.5879 -6.98949 -50.6011 -9.32166     |
| 20 2V70 | 1 | 20 -9.07452 4.110587           | []                                                                                                   | 853.6174 -64.6296 -6.4024 -38.7506 -9.07452     |
| 20 2V70 | 1 | 20 -8.59912 4.261309 6 10 16 1 | [28, [48, 51, 52, 53, 54, 55, 79, 106, 108, 37], [48, 52, 54, 55, 53, 51], [48, 52, 54, 55, 53, 51]] | 686.2805 -78.8413 -6.67116 -50.2244 -8.59912    |
| 20 2V70 | 1 | 20 -8.1529 3.415794            | []                                                                                                   | 718.2269 -66.9044 -7.1361 -41.2041 -8.1529      |
| 21 2V70 | 1 | 21 -8.09683 1.936526           | 10 [[4, 5, 23, 24, 25, 35, 36, 40, 41, 42]]                                                          | 417.3049 -119.652 -9.21589 -22.6361 -8.09683    |
| 21 2V70 | 1 | 21 -7.80872 2.41855            | 6                                                                                                    | 7 390.1728 -107.439 -8.69154 -26.5378 -7.80872  |
| 21 2V70 | 1 | 21 -7.60004 2.09678            | 6                                                                                                    | 7 419.142 -123.855 -9.60748 -17.465 -7.60004    |
| 21 2V70 | 1 | 21 -7.49605 2.635899 6 35 10   | [32, 12, [1, 6, 34, 39, 52, 80, 85, 86, 27, 37]]                                                     | 378.177 -82.2361 -8.71449 -30.3806 -7.49605     |
| 21 2V70 | 1 | 21 -7.20202 3.76473            | 4                                                                                                    | 6 427.7049 -103.598 -9.02354 -26.8551 -7.20202  |
| 22 2V70 | 1 | 22 -7.5543 1.879724 11 12 13   | [31, 31, [36, 40, 42, 43, 41, 39], [36, 40, 42, 43, 41, 39]]                                         | 157.916 -85.8462 -8.62595 -41.725 -7.5543       |
| 22 2V70 | 1 | 22 -7.47083 2.46857            | []                                                                                                   | 161.2137 -74.5836 -8.861 -39.9962 -7.47083      |
| 22 2V70 | 1 | 22 -7.31678 1.863237           | 15                                                                                                   | 31 165.3657 -93.8205 -10.3392 -33.9014 -7.31678 |
| 22 2V70 | 1 | 22 -7.2998 3.259812            | []                                                                                                   | 167.7164 -90.4961 -8.60243 -33.6036 -7.2998     |
| 22 2V70 | 1 | 22 -7.25058 2.186588           | []                                                                                                   | 161.2885 -67.4249 -8.65677 -36.7263 -7.25058    |
| 23 2V70 | 1 | 23 -7.28681 1.79133            | []                                                                                                   | 173.178 -100.924 -9.39788 -25.468 -7.28681      |
| 23 2V70 | 1 | 23 -6.60607 1.881178 6 7       | [26, 26]                                                                                             | 172.5198 -92.996 -9.22994 -24.0445 -6.60607     |
| 23 2V70 | 1 | 23 -6.46465 1.950306           | []                                                                                                   | 139.1928 -61.7427 -9.64448 -28.8544 -6.46465    |
| 23 2V70 | 1 | 23 -6.41296 1.943059           | 9                                                                                                    | 23 140.7766 -69.8243 -8.2953 -26.6875 -6.41296  |
| 23 2V70 | 1 | 23 -6.40917 2.204575           | 9                                                                                                    | 23 144.4051 -96.1699 -8.49291 -24.731 -6.40917  |

|         |   |    |          |          |    |    |    |    |                                                                                    |          |          |          |          |          |          |
|---------|---|----|----------|----------|----|----|----|----|------------------------------------------------------------------------------------|----------|----------|----------|----------|----------|----------|
| 24 2V70 | 1 | 24 | -7.87825 | 1.352697 | 22 | 6  | 7  | 10 | [[2, 2, 2, 2, 2, 2], 28, 28,<br>[2, 3, 11, 20, 26, 31, 43, 4<br>4, 48, 49]]        | 528.2738 | -108.522 | -8.38824 | -29.036  | -7.87825 |          |
| 24 2V70 | 1 | 24 | -7.68251 | 1.346903 |    |    |    | 10 | [[4, 8, 12, 16, 33, 35, 37,<br>39, 54, 56]]                                        | 461.7964 | -93.5163 | -9.39529 | -33.7147 | -7.68251 |          |
| 24 2V70 | 1 | 24 | -7.67551 | 1.887196 | 6  | 7  |    |    | [28, 28]                                                                           | 376.4544 | -92.3264 | -8.47307 | -27.9128 | -7.67551 |          |
| 24 2V70 | 1 | 24 | -7.597   | 1.5024   | 22 | 6  | 7  | 9  | [[2, 2, 2, 2, 2, 2], 28, 28,<br>31, 31, [2, 3, 6, 11, 26, 31<br>, 32, 43, 49, 50]] | 492.3109 | -115.292 | -8.30506 | -34.0245 | -7.597   |          |
| 24 2V70 | 1 | 24 | -7.41165 | 1.997274 |    |    |    | 4  |                                                                                    | 27       | 523.444  | -88.1692 | -8.93672 | -32.3782 | -7.41165 |
| 25 2V70 | 1 | 25 | -8.4762  | 2.41928  |    |    |    | 9  |                                                                                    | 39       | 362.3969 | -105.397 | -9.7491  | -35.9079 | -8.4762  |
| 25 2V70 | 1 | 25 | -8.38915 | 2.342752 | 22 | 9  | 23 | 1  | [[4, 4, 4, 4, 4, 4], 39, 39,<br>[2, 4, 21, 36, 37, 39, 47, 4<br>9, 56, 57]]        | 366.876  | -83.5209 | -9.85122 | -33.6569 | -8.38915 |          |
| 25 2V70 | 1 | 25 | -8.14493 | 3.547757 |    |    |    |    | []                                                                                 |          | 348.2345 | -97.3618 | -9.15724 | -36.7215 | -8.14493 |
| 25 2V70 | 1 | 25 | -7.28433 | 2.313627 | 9  | 23 | 10 |    | [40, 40, [5, 24, 26, 36, 40<br>, 44, 49, 64, 65, 66]]                              | 460.9652 | -100.34  | -8.83983 | -37.8817 | -7.28433 |          |
| 25 2V70 | 1 | 25 | -7.25844 | 2.53165  |    |    |    | 42 |                                                                                    | 33       | 456.9665 | -75.5017 | -9.38477 | -19.7198 | -7.25844 |
| 26 2V70 | 1 | 26 | -8.16168 | 1.601083 | 2  | 3  | 22 | 6  | [1, 1, [23, 23, 23, 23, 23,<br>23], 1, 7, 7]                                       | 285.1332 | -83.5387 | -9.50752 | -44.3075 | -8.16168 |          |
| 26 2V70 | 1 | 26 | -8.11193 | 2.018285 | 6  | 10 |    |    | [4, [12, 28, 39, 42, 45, 47<br>, 56, 65, 66, 67]]                                  | 285.2218 | -66.536  | -9.02067 | -40.0438 | -8.11193 |          |
| 26 2V70 | 1 | 26 | -7.83158 | 1.885825 | 9  | 23 |    |    | [7, 7]                                                                             |          | 285.6354 | -96.779  | -9.78302 | -34.3339 | -7.83158 |
| 26 2V70 | 1 | 26 | -7.4588  | 1.329001 |    |    |    | 13 | [[31, 33, 35, 36, 34, 32]]                                                         | 269.6613 | -96.5349 | -8.71861 | -37.3164 | -7.4588  |          |
| 26 2V70 | 1 | 26 | -7.45303 | 1.90269  | 2  | 9  | 23 |    | [1, 7, 7]                                                                          |          | 294.1816 | -92.7221 | -8.70987 | -33.522  | -7.45303 |
| 27 2V70 | 1 | 27 | -7.63728 | 1.824114 | 11 | 12 | 10 |    | [39, 39, [8, 9, 11, 12, 19,<br>30, 38, 39, 44, 77], [8, 10<br>, 12, 19, 11, 9]]    | 506.6597 | -86.628  | -9.85615 | -34.9635 | -7.63728 |          |
| 27 2V70 | 1 | 27 | -7.60946 | 1.964618 | 18 | 19 |    |    | [41, 39]                                                                           |          | 507.6846 | -79.0664 | -8.49174 | -30.9126 | -7.60946 |
| 27 2V70 | 1 | 27 | -7.55008 | 2.281815 | 8  | 10 |    |    | [[8, 10, 12, 19, 11, 9], [8<br>, 10, 12, 78, 80, 86, 9, 19,<br>49, 76]]            | 496.1932 | -91.0037 | -8.91902 | -30.359  | -7.55008 |          |
| 27 2V70 | 1 | 27 | -7.34831 | 2.24599  |    |    |    |    | []                                                                                 |          | 492.7976 | -80.0728 | -8.04251 | -40.2613 | -7.34831 |
| 27 2V70 | 1 | 27 | -7.31709 | 1.759371 |    |    |    |    | []                                                                                 |          | 599.5636 | -87.931  | -8.39848 | -14.7834 | -7.31709 |
| 28 2V70 | 1 | 28 | -7.62055 | 2.77948  |    |    |    |    | []                                                                                 |          | 417.9757 | -73.2236 | -8.88526 | -32.3992 | -7.62055 |

|         |   |                                |                                                                   |                                                |
|---------|---|--------------------------------|-------------------------------------------------------------------|------------------------------------------------|
| 28 2V70 | 1 | 28 -7.45612 2.640953           | []                                                                | 393.3613 -74.0982 -11.164 -41.9267 -7.45612    |
| 28 2V70 | 1 | 28 -7.34881 3.165079 39 6 7 35 | [[37, 39, 41, 42, 40, 38],<br>25, 25, 11]                         | 407.6935 -80.0501 -9.11112 -35.9856 -7.34881   |
| 28 2V70 | 1 | 28 -7.25216 2.755866 6 7 35 40 | [11, 11, 11, 11, [10, 48, 1<br>, 82, 11, 46, 49, 67, 31, 69<br>]] | 464.6458 -61.3862 -9.20859 -41.9591 -7.25216   |
| 28 2V70 | 1 | 28 -7.19489 3.359174           | []                                                                | 401.1649 -112.11 -9.92446 -23.9996 -7.19489    |
| 29 2V70 | 1 | 29 -7.01274 3.095417           | []                                                                | 870.8715 -65.2092 -8.07366 -26.7243 -7.01274   |
| 29 2V70 | 1 | 29 -6.58005 2.580891           | 22 [[21, 21, 21, 21, 21, 21]]                                     | 900.8123 -89.9526 -7.8767 -25.197 -6.58005     |
| 29 2V70 | 1 | 29 -6.49496 2.539917 15 10     | [5, [3, 15, 23, 32, 40, 50,<br>51, 72, 4, 6]]                     | 766.6934 -81.1019 -7.87832 -23.9722 -6.49496   |
| 29 2V70 | 1 | 29 -6.49337 2.848133 11 12 35  | [5, 5, 8]                                                         | 867.1283 -82.3335 -8.12319 -33.8606 -6.49337   |
| 29 2V70 | 1 | 29 -6.40405 4.065658 4 6 7     | [8, 1, 1]                                                         | 880.1988 -83.6712 -10.8312 -31.2456 -6.40405   |
| 30 2V70 | 1 | 30 -7.04179 3.984906           | []                                                                | 65.20968 -95.0879 -7.91826 -32.5544 -7.04179   |
| 30 2V70 | 1 | 30 -7.00929 4.422154           | []                                                                | 261.4944 -93.4205 -7.98702 -30.2169 -7.00929   |
| 30 2V70 | 1 | 30 -6.90266 2.976799           | 10 [[5, 10, 12, 19, 20, 23, 24<br>, 26, 31, 43]]                  | 410.1739 -94.6648 -7.75627 -32.6149 -6.90266   |
| 30 2V70 | 1 | 30 -6.31044 5.807513 4 5       | [25, 25]                                                          | 302.2524 -80.9716 -7.67299 -29.9941 -6.31044   |
| 30 2V70 | 1 | 30 -6.27117 2.162696           | 22 [[9, 9, 9, 9, 9, 9]]                                           | 283.3929 -130.722 -8.25986 -11.9615 -6.27117   |
| 31 2V70 | 1 | 31 -6.59107 1.581163           | []                                                                | 63.02015 -89.4235 -8.76829 -22.7467 -6.59107   |
| 31 2V70 | 1 | 31 -6.51837 1.456006 22 9 23   | [[15, 15, 15, 15, 15, 15],<br>7, 7]                               | 735.5214 -84.1933 -9.28011 -22.2496 -6.51837   |
| 31 2V70 | 1 | 31 -6.4966 1.497958            | 22 [[15, 15, 15, 15, 15, 15]]                                     | 613.8854 -93.025 -8.61483 -17.8279 -6.4966     |
| 31 2V70 | 1 | 31 -6.48407 2.805569           | 9                                                                 | 26 612.3973 -79.6527 -9.6271 -28.1351 -6.48407 |
| 31 2V70 | 1 | 31 -6.48377 0.783044           | []                                                                | 66.12716 -78.8862 -8.92434 -19.7385 -6.48377   |
| 32 2V70 | 1 | 32 -8.01096 2.80135            | []                                                                | 293.3796 -92.9687 -7.92481 -25.0227 -8.01096   |
| 32 2V70 | 1 | 32 -7.80899 2.344469 1 2 3 4 5 | [[39, 43, 45, 46, 44, 42],<br>24, 24, 33, 33, 23, 23]             | 272.1649 -93.4582 -8.388 -43.9536 -7.80899     |
| 32 2V70 | 1 | 32 -7.60953 1.267651           | 8 [[39, 43, 45, 46, 44, 42]]                                      | 266.7696 -71.479 -8.54066 -38.4015 -7.60953    |
| 32 2V70 | 1 | 32 -7.53887 3.044075           | 9                                                                 | 24 312.1551 -87.1341 -7.83433 -22.705 -7.53887 |
| 32 2V70 | 1 | 32 -7.30371 1.670573           | []                                                                | 422.6689 -79.4905 -8.56185 -32.7575 -7.30371   |
| 33 2V70 | 1 | 33 -8.24803 0.991289           | []                                                                | 209.7697 -116.431 -10.1276 -32.4018 -8.24803   |
| 33 2V70 | 1 | 33 -7.97373 0.960303           | []                                                                | 197.2893 -112.809 -9.5933 -22.6582 -7.97373    |
| 33 2V70 | 1 | 33 -7.52023 1.341218 6 7       | [27, 27]                                                          | 186.9686 -117.117 -8.78118 -39.6242 -7.52023   |

|         |   |                               |                                                                                                                                                                                                                                                                                                                                                                                  |                                              |
|---------|---|-------------------------------|----------------------------------------------------------------------------------------------------------------------------------------------------------------------------------------------------------------------------------------------------------------------------------------------------------------------------------------------------------------------------------|----------------------------------------------|
| 33 2V70 | 1 | 33 -7.44098 1.181069 11 12 10 | [27, 27, [25, 31, 34, 35, 37, 38, 39, 40, 41, 55], [34, 38, 40, 41, 39, 37], [34, 38, 40, 41, 39, 37]]                                                                                                                                                                                                                                                                           | 195.6474 -81.7655 -8.6841 -40.6462 -7.44098  |
| 33 2V70 | 1 | 33 -7.31469 1.911271 42 43    | [30, 30]<br>[[53, 59, 2, 7, 16, 41, 48, 50, 1, 5], [6, 7, 16, 41, 48, 50, 51, 53, 59, 60], [3, 6, 9, 10, 20, 21, 48, 51, 55, 59], 21, [3, 10, 21, 25, 31, 34, 38, 48, 51, 55], [26, 35, 40, 41, 44, 59, 91, 16, 43, 45], [11, 15, 39, 49, 56, 66, 70, 71, 85, 86], [87, 27, 28, 36, 42, 71, 72, 88, 89, 17], [40, 44, 46, 47, 45, 43], [32, 77, 78, 79, 62, 19, 58, 12, 13, 22]] | 203.1644 -125.936 -8.87862 -28.7881 -7.31469 |
| 1 2VZ6  | 1 | 1 -8.06138 1.736709 2 3 19 35 | [16, [41, 16, 26, 35, 53, 59, 72, 90, 6, 7], [16, 26, 35, 41, 51, 53, 59, 90, 6, 17], [6, 10, 15, 16, 21, 25, 26, 34, 48, 51], [10, 21, 25, 31, 34, 38, 39, 55, 74, 75], [88, 36, 42, 70, 80, 85, 91, 24, 27, 33], [40, 44, 46, 47, 45, 43], [66, 77, 12, 22, 32, 49, 58, 1, 4, 5]]                                                                                              | 410.9614 -84.3669 -7.66763 -22.216 -8.06138  |
| 1 2VZ6  | 1 | 1 -7.01644 3.664124 1 2 3 19  | [16, [41, 16, 26, 35, 53, 59, 72, 90, 6, 7], [16, 26, 35, 41, 51, 53, 59, 90, 6, 17], [6, 10, 15, 16, 21, 25, 26, 34, 48, 51], [10, 21, 25, 31, 34, 38, 39, 55, 74, 75], [88, 36, 42, 70, 80, 85, 91, 24, 27, 33], [40, 44, 46, 47, 45, 43], [66, 77, 12, 22, 32, 49, 58, 1, 4, 5]]                                                                                              | 184.2367 -87.7497 -5.8029 -21.8844 -7.01644  |



|        |   |                                |                                                                                                                                                                                                                                                                                                                                                                                                                                                                                                                                                                                                                                                                                                                                                                                                                                                                                                                                                                                                                         |                                              |
|--------|---|--------------------------------|-------------------------------------------------------------------------------------------------------------------------------------------------------------------------------------------------------------------------------------------------------------------------------------------------------------------------------------------------------------------------------------------------------------------------------------------------------------------------------------------------------------------------------------------------------------------------------------------------------------------------------------------------------------------------------------------------------------------------------------------------------------------------------------------------------------------------------------------------------------------------------------------------------------------------------------------------------------------------------------------------------------------------|----------------------------------------------|
| 1 2VZ6 | 1 | 1 -6.70149 2.676928 1 2 3 17   | [16, [41, 59, 16, 26, 28, 3<br>5, 53, 90, 6, 7], [16, 26, 3<br>5, 41, 51, 53, 59, 2, 6, 7],<br>38, [3, 6, 10, 16, 21, 34, 3<br>8, 48, 51, 55], [10, 21, 25<br>, 31, 34, 38, 39, 55, 63, 74<br>], 33, 33, [87, 24, 36, 42,<br>70, 80, 86, 89, 91, 27], [8<br>7, 88, 40, 43, 45, 47, 90, 9<br>2, 35, 44], [40, 44, 46, 47<br>, 45, 43], [22, 65, 66, 12,<br>49, 58, 4, 14, 19, 32]]<br>[[86, 88, 89, 39, 42, 70, 8<br>4, 24, 34, 36, 86, 88, 89, 3<br>9, 42, 70, 84, 24, 34, 36],<br>[36, 42, 43, 45, 88, 89, 40<br>, 90, 92, 35], [31, 55, 75,<br>76, 10, 21, 25, 38, 51, 81]<br>, [82, 30, 37, 60, 83, 3, 18<br>, 20, 48, 50], [45, 46, 47,<br>93, 94, 44, 91, 43, 92, 40]<br>, 21, [52, 53, 7, 17, 28, 72<br>, 59, 71, 41, 16]]<br>[[37, 81, 82, 38, 51, 55, 7<br>5, 3, 6, 10, 37, 81, 82, 38,<br>51, 55, 75, 3, 6, 10], [93,<br>44, 46, 87, 89, 91, 42, 47,<br>194, 36], [24, 33, 39, 70, 8<br>4, 85, 89, 15, 25, 34], [65<br>, 79, 78, 22, 32, 66, 12, 49<br>, 56, 77], [66, 19, 22, 32,<br>61, 62, 77, 79, 12, 58]] | 191.0564 -58.9116 -5.35072 -21.6298 -6.70149 |
| 1 2VZ6 | 1 | 1 -6.55493 3.264217 2 3 13 14  | 76, 10, 21, 25, 38, 51, 81]<br>, [82, 30, 37, 60, 83, 3, 18<br>, 20, 48, 50], [45, 46, 47,<br>93, 94, 44, 91, 43, 92, 40]<br>, 21, [52, 53, 7, 17, 28, 72<br>, 59, 71, 41, 16]]<br>[[37, 81, 82, 38, 51, 55, 7<br>5, 3, 6, 10, 37, 81, 82, 38,<br>51, 55, 75, 3, 6, 10], [93,<br>44, 46, 87, 89, 91, 42, 47,<br>194, 36], [24, 33, 39, 70, 8<br>4, 85, 89, 15, 25, 34], [65<br>, 79, 78, 22, 32, 66, 12, 49<br>, 56, 77], [66, 19, 22, 32,<br>61, 62, 77, 79, 12, 58]]                                                                                                                                                                                                                                                                                                                                                                                                                                                                                                                                                  | 160.9017 -29.3267 -6.27644 -34.0278 -6.55493 |
| 1 2VZ6 | 1 | 1 -6.30545 1.832358 2 12 13 19 | 4, 85, 89, 15, 25, 34], [65<br>, 79, 78, 22, 32, 66, 12, 49<br>, 56, 77], [66, 19, 22, 32,<br>61, 62, 77, 79, 12, 58]]                                                                                                                                                                                                                                                                                                                                                                                                                                                                                                                                                                                                                                                                                                                                                                                                                                                                                                  | 182.009 -52.4406 -7.04434 -30.4855 -6.30545  |

|        |   |                               |                                                                                                                                                                                                                                                                                                     |                                              |
|--------|---|-------------------------------|-----------------------------------------------------------------------------------------------------------------------------------------------------------------------------------------------------------------------------------------------------------------------------------------------------|----------------------------------------------|
| 2 2VZ6 | 1 | 2 -6.55054 2.356541 2 3 17 18 | [[52, 3, 32, 44, 70, 71, 51, 53, 73, 49], [28, 43, 44, 70, 73, 20, 21, 32, 60, 3], 28, 28, [6, 9, 16, 17, 18, 20, 24, 26, 28, 30], [45, 60, 70, 2, 6, 11, 26, 31, 47, 49], [35, 64, 5, 8, 12, 34, 37, 39, 42, 58], [62, 7, 13, 27, 36, 37, 48, 53, 63, 72], [27, 36, 68, 72, 1, 5, 10, 13, 22, 41]] | 397.2436 -48.3138 -6.43338 -18.5647 -6.55054 |
| 2 2VZ6 | 1 | 2 -6.25361 2.08842 2 3 17 18  | [[48, 2, 31, 50, 3, 11, 32, 52, 53, 70], [2, 11, 31, 32, 48, 52, 70, 71, 3, 14], 28, 28, 28, 28, [6, 9, 16, 17, 20, 21, 24, 26, 28, 30], 27, 27, [35, 12, 34, 37, 39, 42, 58, 62, 64, 72], [7, 13, 27, 36, 62, 63, 72, 49, 50, 2], [68, 59, 1, 5, 6, 10, 41, 45, 47, 61]]                           | 408.5316 -82.2021 -7.40477 -16.3366 -6.25361 |
| 2 2VZ6 | 1 | 2 -6.07435 2.517906 3 19 4 7  | [[2, 48, 49, 60, 6, 11, 26, 31, 61, 69], [2, 6, 11, 20, 26, 43, 48, 60, 61, 71], [16, 20, 28, 39, 43, 61, 67, 6, 17, 21], [46, 47, 1, 57, 40, 66, 61, 5, 9, 17], [5, 34, 58, 59, 27, 42, 62, 72, 7, 13]]                                                                                            | 352.6574 -41.9854 -6.3533 -27.9233 -6.07435  |

|        |   |   |          |          |   |    |    |   |                                                                                                                                                                                                                                                                                                              |          |          |          |          |          |
|--------|---|---|----------|----------|---|----|----|---|--------------------------------------------------------------------------------------------------------------------------------------------------------------------------------------------------------------------------------------------------------------------------------------------------------------|----------|----------|----------|----------|----------|
| 2 2VZ6 | 1 | 2 | -5.94692 | 2.349864 | 2 | 3  | 19 | 4 | [[9, 28, 38, 39, 67, 73, 15, 16, 21, 24], [28, 39, 67, 73, 9, 16, 20, 21, 24, 43], [6, 11, 16, 20, 32, 39, 43, 60, 61, 71], [3, 7, 11, 14, 25, 31, 32, 43, 48, 51], [6, 4, 8, 29, 35, 37, 51, 65, 74, 12, 23], [5, 57, 58, 59, 4, 1, 18, 34, 68, 17, 30]]                                                    | 370.9131 | -33.0788 | -7.1487  | -16.6245 | -5.94692 |
| 2 2VZ6 | 1 | 2 | -5.70135 | 4.032457 | 3 | 17 | 18 | 5 | [[5, 12, 34, 35, 39, 59, 64, 75, 8, 16], 33, 33, 33, 29, 29, [29, 74, 54, 4, 56, 23, 3, 33, 38, 55, 73], [45, 46, 60, 6, 28, 43, 73, 1, 61, 2, 45, 46, 60, 6, 28, 43, 73, 1, 61, 2]]                                                                                                                         | 381.8925 | -91.9469 | -7.59277 | -33.2789 | -5.70135 |
| 3 2VZ6 | 1 | 3 | -7.35401 | 1.449889 | 2 | 12 | 13 | 1 | [[49, 8, 47, 53, 70, 85, 2, 3, 7, 18, 49, 8, 47, 53, 70, 85, 2, 3, 7, 18], [92, 38, 4, 5, 84, 34, 37, 43, 46, 83, 9, 0], [33, 34, 38, 50, 65, 72, 1, 82, 83, 37, 10], [77, 21, 31, 58, 64, 76, 65, 78, 11, 14], [33, 41, 82, 86, 87, 8, 8, 73, 77, 65, 26], 23, 23, [23, 69, 15, 60, 61, 81, 6, 12, 16, 56]] | 111.9676 | -69.8471 | -6.99702 | -42.0869 | -7.35401 |

|        |   |   |          |          |   |    |    |    |                                                                                                                                                                                                                                                                                                                                                                                                                                                                                                                                                                                                                                                                                                                                                                                                                                                                             |          |          |          |          |          |
|--------|---|---|----------|----------|---|----|----|----|-----------------------------------------------------------------------------------------------------------------------------------------------------------------------------------------------------------------------------------------------------------------------------------------------------------------------------------------------------------------------------------------------------------------------------------------------------------------------------------------------------------------------------------------------------------------------------------------------------------------------------------------------------------------------------------------------------------------------------------------------------------------------------------------------------------------------------------------------------------------------------|----------|----------|----------|----------|----------|
| 3 2VZ6 | 1 | 3 | -7.30725 | 1.808435 | 2 | 12 | 40 | 1  | <p>[[49, 8, 47, 48, 53, 63, 70<br/> , 83, 3, 7, 49, 8, 47, 48, 53<br/> , 63, 70, 83, 3, 7], [92, 45<br/> , 37, 43, 46, 73, 84, 85, 90<br/> , 93], 38, [33, 34, 38, 50,<br/> 76, 82, 84, 10, 17, 18], [7<br/> 7, 78, 21, 31, 58, 65, 64, 7<br/> 6, 11, 14], 23, 23, [23, 69<br/> , 15, 60, 62, 81, 6, 12, 16,<br/> 24]]</p> <p>[[28, 35, 40, 49, 63, 3, 8,<br/> 19, 47, 48], [8, 19, 27, 28<br/> , 47, 48, 49, 53, 63, 79], 1<br/> 7, 17, [85, 43, 45, 84, 90,<br/> 92, 28, 35, 39, 42], [33, 8<br/> 2, 26, 29, 73, 74, 86, 51, 5<br/> 4, 65], [75, 30, 36, 41, 74<br/> , 87, 88, 35, 39, 40], [31,<br/> 76, 77, 78, 23, 58, 69, 11,<br/> 14, 21]]</p> <p>[[44, 39, 42, 43, 45, 46, 7<br/> 3, 89, 91, 92], [73, 88, 26<br/> , 29, 33, 36, 41, 74, 82, 86<br/> ], 36, 36, [40, 75, 30, 35,<br/> 39, 63, 89, 42, 87, 55], [4<br/> 7, 2, 7, 17, 49, 53, 62, 72,<br/> 1, 3]]</p> | 123.0262 | -41.0479 | -6.68921 | -40.3964 | -7.30725 |
| 3 2VZ6 | 1 | 3 | -7.15386 | 2.648959 | 2 | 3  | 17 | 18 | <p>[[44, 39, 42, 43, 45, 46, 7<br/> 3, 89, 91, 92], [73, 88, 26<br/> , 29, 33, 36, 41, 74, 82, 86<br/> ], 36, 36, [40, 75, 30, 35,<br/> 39, 63, 89, 42, 87, 55], [4<br/> 7, 2, 7, 17, 49, 53, 62, 72,<br/> 1, 3]]</p>                                                                                                                                                                                                                                                                                                                                                                                                                                                                                                                                                                                                                                                       | 172.6986 | -97.8612 | -6.47124 | -21.264  | -7.15386 |
| 3 2VZ6 | 1 | 3 | -7.0656  | 3.887769 | 2 | 3  | 17 | 18 | <p>[[44, 39, 42, 43, 45, 46, 7<br/> 3, 89, 91, 92], [73, 88, 26<br/> , 29, 33, 36, 41, 74, 82, 86<br/> ], 36, 36, [40, 75, 30, 35,<br/> 39, 63, 89, 42, 87, 55], [4<br/> 7, 2, 7, 17, 49, 53, 62, 72,<br/> 1, 3]]</p>                                                                                                                                                                                                                                                                                                                                                                                                                                                                                                                                                                                                                                                       | 130.3706 | -68.6514 | -6.04032 | -36.9055 | -7.0656  |

|        |   |   |          |          |    |    |    |    |    |                                                                                                                                                                                                                                                                |          |          |          |          |          |
|--------|---|---|----------|----------|----|----|----|----|----|----------------------------------------------------------------------------------------------------------------------------------------------------------------------------------------------------------------------------------------------------------------|----------|----------|----------|----------|----------|
| 3 2VZ6 | 1 | 3 | -7.06488 | 3.197079 | 2  | 3  | 5  | 7  | 8  | [[28, 35, 40, 49, 63, 3, 8, 19, 47, 48], [8, 19, 27, 28, 47, 48, 49, 53, 63, 2], [8, 5, 43, 45, 90, 92, 28, 35, 3, 9, 84, 42], [33, 82, 26, 29, 73, 74, 86, 51, 54, 36], [75, 30, 36, 41, 74, 87, 88, 35, 39, 40], [76, 31, 58, 6, 9, 11, 14, 21, 59, 65, 77]] | 169.6889 | -104.886 | -5.97101 | -22.3178 | -7.06488 |
| 4 2VZ6 | 1 | 4 | -5.38372 | 3.758449 | 1  | 41 | 3  | 32 | 33 | [8, 8, [5, 8, 18, 28, 29, 37, 41, 43, 46, 60], 2, 2, [32, 56, 68, 70, 6, 26, 31, 38, 42, 67, 32, 56, 68, 70, 6, 2, 6, 31, 38, 42, 67]]                                                                                                                         | 589.7092 | -38.0891 | -5.73262 | -24.3531 | -5.38372 |
| 4 2VZ6 | 1 | 4 | -5.31129 | 5.88515  | 28 | 3  | 7  | 11 | 12 | [[33, 74, 75, 7, 58, 73, 52, 53, 24, 54], [27, 45, 52, 58, 75, 6, 19, 42, 44, 69], [70, 71, 32, 72, 56, 6, 23, 26, 50, 51], [3, 39, 40, 65, 1, 12, 15, 59, 2, 10]]                                                                                             | 571.9725 | -62.9826 | -6.87318 | -26.0219 | -5.31129 |
| 4 2VZ6 | 1 | 4 | -5.29156 | 5.133081 | 28 | 2  | 11 | 12 | 13 | [[68, 31, 4, 33, 57, 67, 69, 73, 75, 7], [4, 31, 57, 68, 73, 27, 33, 34, 47, 7], [3, 0, 65, 66, 2, 36, 49, 64, 5, 41, 13]]                                                                                                                                     | 456.9686 | -80.8419 | -6.66209 | -28.0195 | -5.29156 |
| 4 2VZ6 | 1 | 4 | -5.18139 | 4.230043 | 1  | 41 | 2  | 3  | 4  | [8, 8, [5, 41, 18, 36, 37, 4, 3, 2, 13, 8, 29], [5, 8, 37, 41, 43, 60, 61, 21, 28, 29], [23, 40, 50, 51, 71, 32, 7, 0, 72, 3, 1], [33, 57, 73, 7, 4, 75, 7, 27, 58, 68, 69]]                                                                                   | 396.6478 | -40.446  | -5.75154 | -26.7138 | -5.18139 |

|        |   |   |          |          |   |   |    |    |                                                                                                                                                                                                                                                                                                          |          |          |          |          |          |
|--------|---|---|----------|----------|---|---|----|----|----------------------------------------------------------------------------------------------------------------------------------------------------------------------------------------------------------------------------------------------------------------------------------------------------------|----------|----------|----------|----------|----------|
| 4 2VZ6 | 1 | 4 | -5.0708  | 3.121007 | 2 | 3 | 17 | 18 | [[4, 31, 67, 68, 16, 23, 26, 42, 50, 56], [4, 12, 15, 16, 23, 31, 34, 42, 50, 67], 3, 3, [60, 58, 4, 21, 27, 31, 34, 35, 47, 57], [36, 41, 44, 48, 2, 5, 13, 14, 19, 22], [7, 45, 52, 55, 24, 25, 54, 27, 33, 69], 8, [24, 25, 46, 52, 53, 54, 57, 43, 61, 5]]                                           | 622.0294 | -57.07   | -5.69576 | -0.00167 | -5.0708  |
| 5 2VZ6 | 1 | 5 | -7.40146 | 3.09678  | 2 | 3 | 17 | 7  | [[28, 36, 43, 66, 3, 8, 19, 50, 51, 52], [8, 19, 27, 28, 50, 51, 52, 56, 66, 2], 17, [34, 84, 26, 29, 75, 76, 91, 54, 57, 67], [77, 30, 37, 44, 76, 93, 92, 36, 42, 43], [68, 23, 39, 62, 11, 15, 21, 31, 32, 63]]                                                                                       | 151.9944 | -96.6803 | -5.52145 | -26.0062 | -7.40146 |
| 5 2VZ6 | 1 | 5 | -7.31385 | 1.109239 | 2 | 3 | 4  | 5  | [[53, 88, 89, 10, 17, 27, 34, 63, 4, 7], [4, 10, 11, 27, 34, 53, 54, 63, 67, 84], [4, 9, 13, 20, 21, 22, 26, 29, 30, 34], [34, 84, 26, 27, 75, 89, 91, 18, 35, 40], [51, 3, 50, 52, 55, 58, 66, 1, 2, 5], [35, 41, 43, 90, 94, 36, 40, 42, 45, 88], 30, 30, 24, [39, 85, 32, 38, 86, 23, 87, 64, 83, 6]] | 159.7499 | -104.649 | -8.60217 | -17.6054 | -7.31385 |

|        |   |   |          |          |   |    |    |                                                                                                                  |                                                                                                                                                                                                                                                                            |          |          |          |          |          |
|--------|---|---|----------|----------|---|----|----|------------------------------------------------------------------------------------------------------------------|----------------------------------------------------------------------------------------------------------------------------------------------------------------------------------------------------------------------------------------------------------------------------|----------|----------|----------|----------|----------|
| 5 2VZ6 | 1 | 5 | -7.30258 | 2.855572 | 2 | 3  | 17 | 18                                                                                                               | [[28, 36, 43, 66, 8, 19, 50, 51, 52, 56], [8, 19, 27, 2, 8, 50, 52, 56, 66, 81, 83], 17, 17, 34, 34, [34, 26, 29, 75, 76, 84, 93, 37, 54, 57], [37, 44, 76, 77, 91, 92, 36, 42, 45, 46], [68, 21, 60, 62, 86, 11, 12, 15, 23, 31, 68, 21, 60, 62, 86, 11, 12, 15, 23, 31]] | 140.7892 | -72.3753 | -5.33869 | -31.2666 | -7.30258 |
| 5 2VZ6 | 1 | 5 | -7.04057 | 3.287058 | 2 | 12 | 13 | 1, 8], [2, 5, 50, 51, 55, 61, 69, 22, 6, 12], [81, 33, 82, 83, 24, 65], [94, 36, 43, 42, 45, 52, 66, 56, 72, 74] | 85.68433                                                                                                                                                                                                                                                                   | -42.9952 | -5.28463 | -33.0935 | -7.04057 |          |
| 5 2VZ6 | 1 | 5 | -6.90586 | 3.789803 | 2 | 3  | 5  | 6                                                                                                                | [[28, 36, 43, 66, 3, 8, 19, 50, 51, 52], [8, 19, 27, 28, 50, 52, 56, 66, 2, 3], [46, 48, 95, 97, 28, 36, 42, 45, 47, 49], 34, 34, [34, 26, 29, 75, 76, 84, 88, 93, 54, 57], [77, 30, 37, 44, 76, 91, 36, 42, 43, 45], [68, 15, 63, 87, 11, 21, 23, 31, 62, 78]]            | 148.9113 | -66.4812 | -6.29196 | -24.8039 | -6.90586 |

|        |   |             |           |   |   |    |    |                                                                                                                                                                                                                                                                                                                                                                                                                                                                                                                                                                                                                                                                                                                                                                                                                                                         |           |           |           |           |           |
|--------|---|-------------|-----------|---|---|----|----|---------------------------------------------------------------------------------------------------------------------------------------------------------------------------------------------------------------------------------------------------------------------------------------------------------------------------------------------------------------------------------------------------------------------------------------------------------------------------------------------------------------------------------------------------------------------------------------------------------------------------------------------------------------------------------------------------------------------------------------------------------------------------------------------------------------------------------------------------------|-----------|-----------|-----------|-----------|-----------|
| 6 2VZ6 | 1 | 6 -8. 42855 | 2. 38433  | 2 | 3 | 45 | 4  | [[35, 76, 33, 34, 74, 75, 3<br>0, 31, 32, 73], [5, 33, 35,<br>74, 76, 26, 30, 31, 36, 55]<br>, [30, 32, 34, 35, 33, 31],<br>[5, 19, 20, 23, 24, 26, 36,<br>40, 62, 65], [1, 37, 38, 90<br>, 91, 30, 83, 2, 29, 45], [2<br>, 74, 33, 35, 76, 4, 29, 31,<br>34, 75]]<br>[[73, 81, 1, 30, 32, 37, 39<br>, 40, 77, 23], [1, 5, 39, 62<br>, 68, 81, 6, 19, 20, 22], [3<br>, 5, 6, 18, 22, 26, 41, 42, 5<br>4, 62], [5, 33, 35, 74, 76,<br>30, 31, 34, 75, 26], [55, 9<br>1, 11, 66, 78, 2, 29, 45, 71<br>, 92], [2, 30, 31, 32, 33, 3<br>4, 35, 73, 74, 75], [43, 44<br>, 56, 87, 88, 100, 12, 50, 5<br>7, 8]]<br>[[2, 30, 31, 33, 77, 1, 4, 2<br>9, 32, 34], [1, 2, 29, 31, 3<br>7, 77, 4, 20, 30, 36], 43, 3<br>8, [1, 37, 38, 62, 67, 4, 19<br>, 20, 24, 26], [5, 26, 71, 4<br>, 27, 45, 90, 92, 70, 80], [<br>25, 68, 69, 6, 82, 85, 86, 7<br>, 22, 23]] | 957. 2028 | -71. 4028 | -8. 64397 | -36. 6363 | -8. 42855 |
| 6 2VZ6 | 1 | 6 -8. 34246 | 6. 298863 | 2 | 3 | 19 | 5  | 30, 31, 34, 75, 26], [55, 9<br>1, 11, 66, 78, 2, 29, 45, 71<br>, 92], [2, 30, 31, 32, 33, 3<br>4, 35, 73, 74, 75], [43, 44<br>, 56, 87, 88, 100, 12, 50, 5<br>7, 8]]<br>[[2, 30, 31, 33, 77, 1, 4, 2<br>9, 32, 34], [1, 2, 29, 31, 3<br>7, 77, 4, 20, 30, 36], 43, 3<br>8, [1, 37, 38, 62, 67, 4, 19<br>, 20, 24, 26], [5, 26, 71, 4<br>, 27, 45, 90, 92, 70, 80], [<br>25, 68, 69, 6, 82, 85, 86, 7<br>, 22, 23]]                                                                                                                                                                                                                                                                                                                                                                                                                                      | 1070. 721 | -29. 2511 | -6. 84503 | -43. 1326 | -8. 34246 |
| 6 2VZ6 | 1 | 6 -7. 25351 | 3. 814218 | 2 | 3 | 43 | 17 | 8, [1, 37, 38, 62, 67, 4, 19<br>, 20, 24, 26], [5, 26, 71, 4<br>, 27, 45, 90, 92, 70, 80], [<br>25, 68, 69, 6, 82, 85, 86, 7<br>, 22, 23]]                                                                                                                                                                                                                                                                                                                                                                                                                                                                                                                                                                                                                                                                                                              | 857. 5286 | -52. 0341 | -8. 86745 | -44. 4517 | -7. 25351 |



|        |   |   |          |          |    |   |    |    |                                                                                                                                                                                                                                                                                                                                                                                                                                                                                                                                                                                                                                                                                                                                                                                                                                                                                                                                |                                                                                                                                                                                                                                                                                            |          |          |          |          |         |
|--------|---|---|----------|----------|----|---|----|----|--------------------------------------------------------------------------------------------------------------------------------------------------------------------------------------------------------------------------------------------------------------------------------------------------------------------------------------------------------------------------------------------------------------------------------------------------------------------------------------------------------------------------------------------------------------------------------------------------------------------------------------------------------------------------------------------------------------------------------------------------------------------------------------------------------------------------------------------------------------------------------------------------------------------------------|--------------------------------------------------------------------------------------------------------------------------------------------------------------------------------------------------------------------------------------------------------------------------------------------|----------|----------|----------|----------|---------|
| 6 2VZ6 | 1 | 6 | -7.09415 | 5.898933 | 19 | 4 | 7  | 26 | [[42, 61, 64, 83, 84, 85, 6<br>, 18, 21, 22], [3, 41, 42, 6<br>1, 82, 83, 84, 85, 86, 6], [<br>84, 86, 5, 26, 39, 40, 70, 8<br>0, 81, 6], [74, 33, 35, 76,<br>2, 4, 26, 27, 28, 29], [40,<br>70, 72, 78, 79, 81, 28, 65,<br>80, 1], [40, 58, 65, 79, 81<br>, 14, 23, 57, 7, 9]]<br>[[86, 82, 83, 41, 42, 20, 3<br>8, 54, 62, 72], [38, 41, 42<br>, 54, 70, 82, 83, 85, 86, 11<br>], 38, 38, [4, 5, 26, 30, 31<br>, 32, 33, 34, 35, 37], [40,<br>79, 80, 39, 65, 81, 93, 95,<br>7, 23], [2, 29, 45, 90, 92,<br>4, 28, 72, 91, 30], [43, 88<br>, 100, 66, 67, 44, 87, 89, 5<br>0, 57, 43, 88, 100, 66, 67,<br>44, 87, 89, 50, 57]]<br>[[81, 36, 49, 71, 80, 10, 1<br>7, 25, 32, 33], [4, 10, 11,<br>26, 32, 36, 49, 50, 58, 65]<br>, [9, 13, 21, 22, 29, 40, 50<br>, 53, 63, 65], [32, 79, 83,<br>81, 26, 35, 36, 73, 80, 82]<br>, [47, 3, 9, 46, 48, 51, 54,<br>62, 1, 2], [28, 37, 48, 87,<br>62, 27, 33, 34, 38, 42], 24<br>] | 960.2541                                                                                                                                                                                                                                                                                   | -26.5369 | -5.12703 | -38.5379 | -7.09415 |         |
| 6 2VZ6 | 1 | 6 | -6.91705 | 3.242656 | 2  | 3 | 17 | 18 | [[86, 82, 83, 41, 42, 20, 3<br>8, 54, 62, 72], [38, 41, 42<br>, 54, 70, 82, 83, 85, 86, 11<br>], 38, 38, [4, 5, 26, 30, 31<br>, 32, 33, 34, 35, 37], [40,<br>79, 80, 39, 65, 81, 93, 95,<br>7, 23], [2, 29, 45, 90, 92,<br>4, 28, 72, 91, 30], [43, 88<br>, 100, 66, 67, 44, 87, 89, 5<br>0, 57, 43, 88, 100, 66, 67,<br>44, 87, 89, 50, 57]]<br>[[81, 36, 49, 71, 80, 10, 1<br>7, 25, 32, 33], [4, 10, 11,<br>26, 32, 36, 49, 50, 58, 65]<br>, [9, 13, 21, 22, 29, 40, 50<br>, 53, 63, 65], [32, 79, 83,<br>81, 26, 35, 36, 73, 80, 82]<br>, [47, 3, 9, 46, 48, 51, 54,<br>62, 1, 2], [28, 37, 48, 87,<br>62, 27, 33, 34, 38, 42], 24<br>]                                                                                                                                                                                                                                                                                    | 942.295                                                                                                                                                                                                                                                                                    | -25.415  | -5.41367 | -35.3665 | -6.91705 |         |
| 7 2VZ6 | 1 | 7 | -7.0245  | 1.76349  | 2  | 3 | 4  | 5  | 7                                                                                                                                                                                                                                                                                                                                                                                                                                                                                                                                                                                                                                                                                                                                                                                                                                                                                                                              | [[81, 36, 49, 71, 80, 10, 1<br>7, 25, 32, 33], [4, 10, 11,<br>26, 32, 36, 49, 50, 58, 65]<br>, [9, 13, 21, 22, 29, 40, 50<br>, 53, 63, 65], [32, 79, 83,<br>81, 26, 35, 36, 73, 80, 82]<br>, [47, 3, 9, 46, 48, 51, 54,<br>62, 1, 2], [28, 37, 48, 87,<br>62, 27, 33, 34, 38, 42], 24<br>] | 171.007  | -69.9958 | -6.74987 | -15.2834 | -7.0245 |

|        |   |   |          |          |   |   |    |    |                                                                                                                                                                                                                                                                                                                                                                  |          |          |          |          |          |
|--------|---|---|----------|----------|---|---|----|----|------------------------------------------------------------------------------------------------------------------------------------------------------------------------------------------------------------------------------------------------------------------------------------------------------------------------------------------------------------------|----------|----------|----------|----------|----------|
| 7 2VZ6 | 1 | 7 | -6.8647  | 3.516333 | 2 | 3 | 17 | 18 | [[28, 34, 39, 62, 3, 8, 19, 46, 47, 48], [8, 19, 27, 28, 46, 47, 48, 52, 62, 2], 17, 17, [7, 17, 25, 27, 33, 37, 46, 48, 52, 60], [42, 44, 87, 89, 28, 34, 37, 38, 41, 43], [32, 79, 26, 29, 73, 74, 81, 82, 85, 50], [75, 30, 35, 40, 74, 83, 84, 34, 38, 39], [63, 23, 57, 69, 11, 14, 21, 58, 12, 15]]                                                        | 189.6399 | -95.0282 | -8.21401 | -23.7254 | -6.8647  |
| 7 2VZ6 | 1 | 7 | -6.71457 | 1.315774 | 2 | 3 | 33 | 34 | [[62, 3, 12, 19, 46, 47, 48, 51, 55, 1], [3, 8, 19, 46, 47, 48, 55, 62, 1, 2], 17, 17, [2, 7, 10, 17, 18, 25, 27, 33, 36, 37], [19, 28, 34, 38, 39, 42, 62, 87, 8, 48], 29, [63, 79, 4, 21, 32, 49, 50, 53, 74, 10], [38, 42, 44, 45, 43, 41], [38, 42, 44, 45, 43, 41], [40, 42, 44, 45, 83, 84, 85, 87, 89, 90], 13, [31, 76, 78, 23, 57, 58, 69, 77, 13, 14]] | 199.3567 | -122.943 | -7.35301 | -13.9509 | -6.71457 |

|        |   |            |          |           |                                                                                                                                                                                                                                                                                                                                                                                               |          |          |          |          |          |
|--------|---|------------|----------|-----------|-----------------------------------------------------------------------------------------------------------------------------------------------------------------------------------------------------------------------------------------------------------------------------------------------------------------------------------------------------------------------------------------------|----------|----------|----------|----------|----------|
| 7 2VZ6 | 1 | 7 -6.64528 | 2.77781  | 2 3 19 35 | [[62, 3, 19, 47, 48, 51, 1, 5, 8, 9], [3, 8, 19, 46, 47, 48, 51, 62, 1, 2], [1, 2, 3, 6, 7, 8, 16, 17, 18, 24], 17, 17, [2, 7, 10, 17, 18, 25, 27, 33, 36, 37], [19, 28, 34, 38, 39, 42, 62, 87, 8, 48], 29, [65, 4, 21, 32, 49, 50, 53, 74, 79, 10], [38, 42, 44, 45, 43, 41], [38, 42, 44, 45, 43, 41], [40, 42, 44, 45, 83, 84, 85, 87, 89, 90], [69, 23, 57, 56, 12, 14, 15, 21, 55, 63]] | 185.6661 | -103.823 | -7.87511 | -9.0705  | -6.64528 |
| 7 2VZ6 | 1 | 7 -6.59226 | 1.404911 | 2 3 17 18 | [[28, 34, 38, 42, 87, 39, 41, 43, 44, 62, 28, 34, 38, 42, 87, 39, 41, 43, 44, 62], [8, 27, 37, 48, 52, 70, 2, 7, 17, 18], 17, 17, [80, 81, 36, 63, 72, 79, 82, 65, 25, 49], 32, [64, 69, 13, 22, 23, 67, 68, 4, 5, 11]]                                                                                                                                                                       | 144.8563 | -52.6394 | -7.24365 | -31.6118 | -6.59226 |
| 8 2VZ6 | 1 | 8 -7.31206 | 2.254784 | 3 19 4 37 | [[79, 11, 49, 70, 77, 85, 86, 9, 15, 19], [9, 11, 15, 19, 23, 49, 77, 79, 85, 86], [8, 9, 10, 11, 12, 15, 19, 25, 30, 33], [57, 58, 66, 4, 62, 1, 56, 80, 7, 74], [38, 30, 92, 12, 19, 44, 55, 80, 10, 11], [4, 48, 67, 81, 82, 84, 13, 22, 65, 14], [48, 83, 84, 14, 46, 20, 32, 36, 68, 5]]                                                                                                 | 460.2786 | -36.0695 | -5.82915 | -36.0986 | -7.31206 |

|        |   |                               |                                                                                                                                                                                                                                                                                                          |                                             |
|--------|---|-------------------------------|----------------------------------------------------------------------------------------------------------------------------------------------------------------------------------------------------------------------------------------------------------------------------------------------------------|---------------------------------------------|
| 8 2VZ6 | 1 | 8 -6.88562 3.60046 3 19 4 37  | [[79, 9, 11, 49, 70, 77, 85, 86, 19, 5], [9, 11, 15, 19, 23, 49, 77, 79, 85, 86], [8, 9, 10, 11, 12, 15, 19, 25, 30, 33], [57, 58, 62, 66, 1, 56, 80, 7, 74, 75], [38, 12, 19, 30, 44, 80, 8, 10, 11, 78], [48, 83, 84, 14, 46, 20, 32, 39, 67, 68]]                                                     | 460.377 -24.1773 -4.18686 -32.0273 -6.88562 |
| 8 2VZ6 | 1 | 8 -6.7933 2.171338 2 3 19 7   | [[15, 51, 75, 80, 85, 86, 12, 23, 25, 33], [7, 12, 15, 44, 51, 54, 75, 80, 85, 86], [7, 19, 28, 29, 30, 35, 38, 44, 54, 55], [92, 39, 14, 23, 32, 42, 49, 83, 84, 8], [81, 13, 37, 48, 53, 73, 20, 21, 22, 27]]                                                                                          | 498.1541 -47.1393 -4.50769 -25.4151 -6.7933 |
| 8 2VZ6 | 1 | 8 -6.33891 3.259934 3 19 4 38 | [[8, 9, 10, 11, 76, 77, 78], [10, 12, 78, 80, 86, 8, 9, 11, 15, 19], [10, 12, 15, 51, 74, 78, 80, 85, 86, 8], [7, 25, 51, 74, 75, 45, 85, 86, 52, 6], [9, 77, 8, 11, 79, 76, 10, 12, 19, 78], [8, 10, 12, 19, 11, 9], [4, 41, 48, 65, 66, 22, 82, 55, 84, 92], [65, 84, 92, 14, 39, 83, 29, 32, 38, 48]] | 491.247 -17.814 -6.83294 -32.2885 -6.33891  |

|        |   |   |           |           |   |    |    |    |                                                                                                                                                                                                                                                                                                                                                                                                                                                                                                                                                                                                                                                                                                                                                                                                                                                                                                                                                                                                                                                                |           |           |           |           |           |
|--------|---|---|-----------|-----------|---|----|----|----|----------------------------------------------------------------------------------------------------------------------------------------------------------------------------------------------------------------------------------------------------------------------------------------------------------------------------------------------------------------------------------------------------------------------------------------------------------------------------------------------------------------------------------------------------------------------------------------------------------------------------------------------------------------------------------------------------------------------------------------------------------------------------------------------------------------------------------------------------------------------------------------------------------------------------------------------------------------------------------------------------------------------------------------------------------------|-----------|-----------|-----------|-----------|-----------|
| 8 2VZ6 | 1 | 8 | -6. 31932 | 2. 600005 | 3 | 19 | 4  | 38 | [[78, 10, 12, 15, 70, 80, 8<br>5, 86, 8, 49], [10, 12, 15,<br>19, 44, 78, 80, 85, 86, 23]<br>, [8, 9, 10, 11, 12, 19, 30,<br>38, 44, 54], [7, 54, 58, 63<br>, 74, 75, 1, 56, 57, 3], [9,<br>77, 8, 76, 11, 19, 39, 79, 9<br>2, 10], [14, 46, 48, 83, 84<br>, 20, 22, 24, 32, 42]]<br>[[10, 44, 37, 47, 73, 1, 3,<br>4, 8, 21, 10, 44, 37, 47, 73<br>, 1, 3, 4, 8, 21], [16, 27, 4<br>5, 63, 64, 74, 31, 6, 11, 17<br>, [28, 66, 67, 18, 51, 65,<br>48, 49, 17, 53]]<br>[[43, 50, 68, 9, 14, 30, 40<br>, 42, 75, 1, 43, 50, 68, 9, 1<br>4, 30, 40, 42, 75, 1], [14,<br>43, 46, 50, 13, 47, 51, 5, 2<br>4, 58], [8, 10, 19, 29, 38,<br>44, 52, 69, 73, 74], [72, 7<br>4, 31, 34, 35, 56, 21, 73, 2<br>3, 45]]<br>[[15, 21, 26, 27, 29, 31, 3<br>5, 38, 63, 64], 26, 26, [2,<br>6, 7, 11, 15, 16, 17, 18, 21<br>4, 26], [68, 75, 25, 30, 33,<br>36, 61, 62, 77, 20], [41, 4<br>2, 58, 10, 47, 3, 5, 9, 13, 4<br>4]]<br>[[10, 44, 38, 52, 71, 3, 8,<br>9, 19, 42], [26, 29, 32, 36<br>1, 62, 70, 75, 69, 15, 25], [16, 27, 63, 64, 65, 6, 26, 4<br>5, 48, 55], 35] | 483. 3174 | -12. 526  | -6. 41286 | -29. 5139 | -6. 31932 |
| 9 2VZ6 | 1 | 9 | -5. 45993 | 2. 319699 | 2 | 13 | 14 |    | 83. 20825                                                                                                                                                                                                                                                                                                                                                                                                                                                                                                                                                                                                                                                                                                                                                                                                                                                                                                                                                                                                                                                      | -48. 531  | -5. 49516 | -25. 6256 | -5. 45993 |           |
| 9 2VZ6 | 1 | 9 | -5. 37063 | 3. 345113 | 2 | 3  | 13 | 14 | 88. 06138                                                                                                                                                                                                                                                                                                                                                                                                                                                                                                                                                                                                                                                                                                                                                                                                                                                                                                                                                                                                                                                      | -37. 1881 | -5. 26349 | -10. 9562 | -5. 37063 |           |
| 9 2VZ6 | 1 | 9 | -5. 28771 | 0. 912127 | 3 | 17 | 18 | 4  | 107. 7354                                                                                                                                                                                                                                                                                                                                                                                                                                                                                                                                                                                                                                                                                                                                                                                                                                                                                                                                                                                                                                                      | -46. 7141 | -8. 33569 | -9. 35502 | -5. 28771 |           |
| 9 2VZ6 | 1 | 9 | -5. 09776 | 3. 680158 | 2 | 13 | 14 | 1  | 76. 09432                                                                                                                                                                                                                                                                                                                                                                                                                                                                                                                                                                                                                                                                                                                                                                                                                                                                                                                                                                                                                                                      | -31. 1186 | -5. 20824 | -24. 3054 | -5. 09776 |           |

|         |   |    |          |          |    |   |    |    |                                                                                                                                                                                                                                                                       |          |          |          |          |          |
|---------|---|----|----------|----------|----|---|----|----|-----------------------------------------------------------------------------------------------------------------------------------------------------------------------------------------------------------------------------------------------------------------------|----------|----------|----------|----------|----------|
| 9 2VZ6  | 1 | 9  | -4.91579 | 2.293516 | 2  | 3 | 17 | 18 | [[61, 68, 75, 77, 30, 36, 4<br>3, 2, 14, 25], [2, 7, 16, 18<br>, 25, 40, 43, 50, 61, 62], 7<br>, 7, [53, 54, 13, 22, 46, 47<br>, 51, 60, 23, 49], [31, 34,<br>72, 73, 21, 35, 37, 55, 56,<br>74]]                                                                     | 94.3508  | -54.7514 | -7.2184  | -20.233  | -4.91579 |
| 10 2VZ6 | 1 | 10 | -6.61412 | 6.321403 | 2  | 3 | 13 | 6  | [[7, 51, 76, 77, 23, 34, 38<br>, 46, 1, 24, 7, 51, 76, 77, 2<br>3, 34, 38, 46, 1, 24], [11,<br>18, 38, 76, 92, 8, 9, 10, 12<br>, 78], [5, 17, 36, 43, 47, 5<br>3, 71, 72, 61, 63], 40, [69<br>, 85, 86, 4, 49, 67, 14, 19,<br>32, 40]]                                | 429.9716 | -57.8    | -4.7869  | -30.3904 | -6.61412 |
| 10 2VZ6 | 1 | 10 | -6.49719 | 5.123814 | 2  | 3 | 43 | 44 | [[9, 11, 38, 79, 81, 92, 8,<br>10, 12, 18], [9, 11, 38, 76<br>, 79, 81, 92, 7, 23, 27], 36<br>, 36, [1, 7, 15, 23, 24, 26,<br>35, 51, 52, 76], [58, 59, 6<br>0, 1, 64, 3, 4, 16, 67, 68],<br>[42, 49, 84, 13, 14, 21, 56<br>, 83, 85, 86]]                            | 428.7578 | -66.4168 | -7.97151 | -30.3161 | -6.49719 |
| 10 2VZ6 | 1 | 10 | -6.28821 | 4.451087 | 28 | 2 | 3  | 15 | [[60, 1, 51, 52, 58, 59, 23<br>, 24, 34, 35], [1, 51, 59, 6<br>0, 23, 27, 34, 38, 55, 77],<br>[1, 7, 51, 59, 60, 77, 8, 9,<br>10, 11], [6, 29, 44, 57, 73<br>, 74, 75, 32, 40, 93], [93,<br>40, 39, 69, 4, 42, 67, 68],<br>[3, 64, 65, 66, 69, 81, 39,<br>41, 89, 9]] | 412.545  | -63.0413 | -5.83993 | -32.247  | -6.28821 |

|         |   |    |          |          |   |    |    |                                                                                                                                                                                                                                  |                                                                                                                                                                                                                                                                                                               |          |          |          |          |          |
|---------|---|----|----------|----------|---|----|----|----------------------------------------------------------------------------------------------------------------------------------------------------------------------------------------------------------------------------------|---------------------------------------------------------------------------------------------------------------------------------------------------------------------------------------------------------------------------------------------------------------------------------------------------------------|----------|----------|----------|----------|----------|
| 10 2VZ6 | 1 | 10 | -6.1882  | 2.260586 | 2 | 32 | 13 | [[1, 7, 58, 76, 77, 12, 18, 38, 51, 54, 1, 7, 58, 76, 77, 12, 18, 38, 51, 54], [8, 10, 12, 18, 11, 9], [6, 40, 50, 12, 18, 11, 9], [6, 40, 50], [86, 40, 93, 67, 68, 4, 14, 42, 49, 21], [84, 13, 48, 90, 42, 64, 3, 4, 16, 41]] | 417.8348                                                                                                                                                                                                                                                                                                      | -20.0503 | -6.28022 | -30.3411 | -6.1882  |          |
| 10 2VZ6 | 1 | 10 | -6.15136 | 4.636907 | 2 | 3  | 19 | 7                                                                                                                                                                                                                                | [[8, 10, 12, 38, 80, 82, 92, 9, 11, 18], [10, 12, 38, 80, 82, 92, 7, 51, 76, 77], [1, 7, 23, 35, 51, 52, 59, 76, 77, 80], [58, 66, 1, 59, 60, 3, 41, 65, 67, 68], [21, 42, 49, 67, 84, 4, 13, 56, 69, 83]]                                                                                                    | 449.2291 | -60.6026 | -7.83661 | -22.8998 | -6.15136 |
| 11 2VZ6 | 1 | 11 | -8.74178 | 2.067727 | 4 | 7  | 26 | 27                                                                                                                                                                                                                               | [[9, 17, 30, 32, 37, 40, 58, 59, 84, 85], [61, 62, 1, 82, 40, 55, 85, 9, 27, 56], [72, 5, 73, 80, 12, 53, 74, 88, 93, 94], [65, 83, 2, 8, 18, 38, 47, 63, 64, 57]]                                                                                                                                            | 514.2079 | 4.347256 | -4.47316 | -42.3152 | -8.74178 |
| 11 2VZ6 | 1 | 11 | -8.02371 | 3.692272 | 2 | 3  | 19 | 5                                                                                                                                                                                                                                | [[72, 5, 12, 15, 44, 65, 88, 93, 94, 22], [12, 48, 72, 85, 88, 94, 15, 19, 22, 30], [9, 10, 19, 30, 31, 32, 37, 40, 48, 58], [11, 21, 43, 71, 10, 12, 19, 22, 44, 4], 41, 41, [100, 41, 34, 91, 92, 14, 32, 40, 59, 77], [44, 73, 74, 4, 5, 21, 22, 43, 70, 72], 46, [50, 8, 47, 57, 82, 83, 89, 99, 13, 20]] | 487.392  | -69.2316 | -4.10342 | -43.3362 | -8.02371 |

|         |   |                                |                                                                                                                                                                                                                                                                                             |                                             |
|---------|---|--------------------------------|---------------------------------------------------------------------------------------------------------------------------------------------------------------------------------------------------------------------------------------------------------------------------------------------|---------------------------------------------|
| 11 2VZ6 | 1 | 11 -7.95438 2.408828 3 19 4 5  | [[44, 72, 73, 5, 22, 53, 80, 88, 93, 94], [12, 15, 25, 53, 88, 93, 94, 19, 22, 32], [10, 12, 15, 19, 27, 32, 3, 5, 40, 48, 55], [43, 70, 4, 71, 11, 21, 69, 87], [74, 8, 8, 100, 10, 11, 12, 19, 21, 22, 69], [77, 91, 92, 14, 2, 0, 34, 50, 52, 78, 7]]                                    | 501.9652 -71.262 -8.80191 -41.5136 -7.95438 |
| 11 2VZ6 | 1 | 11 -7.40843 2.595442 2 13 14 8 | [[12, 19, 61, 85, 94, 1, 15, 27, 32, 35, 12, 19, 61, 85, 94, 1, 15, 27, 32, 35], [1, 4, 31, 34, 41, 59, 75, 76, 9, 2, 100, 86], [75, 77, 6, 45, 66, 76, 90, 98, 13, 24], [69, 73, 4, 5, 11, 12, 21, 22, 43, 44], [68, 97, 3, 17, 8, 4, 96, 66, 42, 67, 98]]                                 | 489.0629 -52.7374 -4.22717 -42.913 -7.40843 |
| 11 2VZ6 | 1 | 11 -7.1626 4.055127 28 2 3 7   | [[66, 3, 67, 9, 61, 84, 85, 1, 42, 60], [9, 61, 66, 84, 85, 1, 58, 62, 72, 5, 9, 61, 66, 84, 85, 1, 58, 62, 72, 5], [10, 19, 31, 32, 48, 58, 59, 85, 86, 34], [53, 79, 9, 3, 94, 40, 7, 25, 46, 78, 80], [4, 11, 21, 22, 43, 69, 7, 0, 87, 44, 71], [7, 50, 78, 80, 92, 57, 82, 8, 47, 14]] | 492.2948 -38.1091 -4.78017 -33.5777 -7.1626 |



|         |   |                                |                                                                                                                                                                                                                                                                                                                                                |                                              |
|---------|---|--------------------------------|------------------------------------------------------------------------------------------------------------------------------------------------------------------------------------------------------------------------------------------------------------------------------------------------------------------------------------------------|----------------------------------------------|
| 12 2VZ6 | 1 | 12 -7.38521 2.179604 2 32 3 17 | [[92, 13, 21, 32, 86, 30, 40, 47, 53, 57, 92, 13, 21, 32, 86, 30, 40, 47, 53, 57], [9, 11, 13, 21, 12, 10], [830, 37, 53, 57, 80, 81, 96, 18, 42], 42, 42, 42, 42, [9, 11, 13, 21, 12, 10], [41, 74, 97, 6, 76, 89, 90, 15, 34, 44], [64, 2, 7, 19, 46, 56, 63, 78, 79, 87]]                                                                   | 332.6437 -37.3904 -3.39773 -43.9528 -7.38521 |
| 12 2VZ6 | 1 | 12 -6.88762 3.352767 2 3 19 5  | [[11, 13, 16, 84, 86, 91, 92, 25, 35, 47], [13, 16, 47, 86, 91, 92, 21, 26, 31, 32], [21, 26, 30, 31, 32, 40, 47, 53, 57, 58], [9, 82, 10, 11, 13, 21, 84, 83, 12, 85], 41, 41, [41, 97, 21, 32, 40, 58, 85, 15, 34, 90], [9, 11, 82, 84, 10, 13, 83, 86], 44, [7, 51, 56, 77, 78, 87, 14, 15, 22, 24, 7, 51, 56, 77, 78, 87, 14, 15, 22, 24]] | 334.2698 -72.8813 -6.98737 -38.0733 -6.88762 |
| 12 2VZ6 | 1 | 12 -6.7606 3.317441 4 37 7 11  | [[11, 12, 13, 16, 21, 27, 32, 35, 40, 47], [59, 60, 71, 72, 1, 12, 40, 61, 85, 8], [97, 9, 10, 12, 13, 21, 32, 40, 47, 58], [51, 89, 90, 15, 49, 22, 34, 39, 74, 6]]                                                                                                                                                                           | 457.0801 -26.6229 -3.57295 -31.7107 -6.7606  |

|         |   |    |          |          |   |   |    |    |                                                                                                                                                                                                                                                                    |          |          |          |          |          |
|---------|---|----|----------|----------|---|---|----|----|--------------------------------------------------------------------------------------------------------------------------------------------------------------------------------------------------------------------------------------------------------------------|----------|----------|----------|----------|----------|
| 12 2VZ6 | 1 | 12 | -6.72075 | 3.003134 | 2 | 3 | 43 | 44 | [[1, 61, 80, 8, 81, 13, 54, 65, 84, 86], [1, 8, 13, 54, 57, 61, 80, 81, 86, 11], 42, 42, 40, [12, 21, 31, 32, 40, 47, 57, 58, 85, 13], 40, [52, 76, 10, 83, 9, 11, 12, 82, 85, 21], [75, 49, 89, 6, 15, 22, 44, 51, 53, 74]]                                       | 461.8106 | -49.1602 | -3.71885 | -32.2796 | -6.72075 |
| 12 2VZ6 | 1 | 12 | -6.43642 | 1.83513  | 2 | 3 | 4  | 5  | 788, 23, 46, 50, 63, 70, 95], [54, 80, 8, 27, 28, 30, 37, 55, 57, 81], [62, 64, 77, 78, 93, 94, 2, 19, 38, 42], [6, 75, 76, 25, 44, 52, 74, 91, 3, 16]]                                                                                                            | 517.497  | -65.8664 | -5.08276 | -1.25636 | -6.43642 |
| 13 2VZ6 | 1 | 13 | -6.724   | 2.31456  | 2 | 3 | 17 | 18 | [[29, 37, 76, 27, 43, 46, 47, 53, 20, 21], [19, 20, 21, 27, 29, 37, 40, 43, 46, 47], 40, 40, [5, 14, 19, 24, 32, 35, 40, 41, 44, 45], [53, 83, 11, 27, 29, 31, 38, 43, 72, 77], 36, [48, 56, 1, 2, 23, 33, 49, 52, 84, 88], [36, 88, 52, 71, 7, 8, 9, 10, 11, 18]] | 395.9431 | -48.4179 | -6.84102 | -10.1311 | -6.724   |

|         |   |    |          |          |   |    |    |    |                                                                                                                                                                                                                                                                                                                                                                                                                                                                                                                                                                                                                                                                                                                                                                                                          |          |          |          |          |          |
|---------|---|----|----------|----------|---|----|----|----|----------------------------------------------------------------------------------------------------------------------------------------------------------------------------------------------------------------------------------------------------------------------------------------------------------------------------------------------------------------------------------------------------------------------------------------------------------------------------------------------------------------------------------------------------------------------------------------------------------------------------------------------------------------------------------------------------------------------------------------------------------------------------------------------------------|----------|----------|----------|----------|----------|
| 13 2VZ6 | 1 | 13 | -6.4095  | 3.016065 | 2 | 3  | 45 | 17 | [[7, 8, 9, 10, 11, 18, 73, 74, 76], [9, 11, 18, 36, 54, 75, 77, 88, 7, 8], [7, 9, 11, 18, 10, 8], 36, 36, [26, 28, 36, 52, 54, 77, 88, 11, 33, 42], 36, 36, [22, 26, 33, 35, 36, 48, 51, 52, 59, 60], [9, 75, 46, 51, 64, 11, 47, 60, 77, 4], [4, 40, 65, 66, 83, 14, 38, 82, 19, 27]]<br>[[78, 79, 2, 12, 34, 46, 58, 59, 13, 15, 78, 79, 2, 12, 34, 46, 58, 59, 13, 15], [37, 8, 10, 18, 74, 76, 7, 9, 11, 29], [48, 49, 60, 84, 63, 2, 17, 22, 35, 1], 35, 35, [55, 56, 1, 17, 35, 52, 44, 57, 26, 36], [61, 5, 67, 68, 69, 86, 3, 49, 63, 1], [71, 6, 54, 70, 42, 72, 28, 31, 38, 89]]<br>[[75, 77, 88, 9, 11, 26, 36, 52, 54, 72], [9, 11, 18, 26, 29, 36, 43, 75, 77, 88], [2, 8, 9, 10, 11, 18, 29, 37, 43, 51], [89, 8, 74, 7, 73, 10, 18, 38, 76, 9], [14, 45, 82, 83, 19, 47, 21, 31, 40, 50]] | 314.2041 | -55.1717 | -6.40944 | -28.7091 | -6.4095  |
| 13 2VZ6 | 1 | 13 | -6.40064 | 2.243903 | 2 | 3  | 13 | 54 | [55, 56, 1, 17, 35, 52, 44, 57, 26, 36], [61, 5, 67, 68, 69, 86, 3, 49, 63, 1], [71, 6, 54, 70, 42, 72, 28, 31, 38, 89]]<br>[[75, 77, 88, 9, 11, 26, 36, 52, 54, 72], [9, 11, 18, 26, 29, 36, 43, 75, 77, 88], [2, 8, 9, 10, 11, 18, 29, 37, 43, 51], [89, 8, 74, 7, 73, 10, 18, 38, 76, 9], [14, 45, 82, 83, 19, 47, 21, 31, 40, 50]]                                                                                                                                                                                                                                                                                                                                                                                                                                                                   | 312.032  | -14.126  | -5.74363 | -31.7212 | -6.40064 |
| 13 2VZ6 | 1 | 13 | -6.21035 | 5.500666 | 3 | 19 | 4  | 7  | [55, 56, 1, 17, 35, 52, 44, 57, 26, 36], [61, 5, 67, 68, 69, 86, 3, 49, 63, 1], [71, 6, 54, 70, 42, 72, 28, 31, 38, 89]]<br>[[75, 77, 88, 9, 11, 26, 36, 52, 54, 72], [9, 11, 18, 26, 29, 36, 43, 75, 77, 88], [2, 8, 9, 10, 11, 18, 29, 37, 43, 51], [89, 8, 74, 7, 73, 10, 18, 38, 76, 9], [14, 45, 82, 83, 19, 47, 21, 31, 40, 50]]                                                                                                                                                                                                                                                                                                                                                                                                                                                                   | 317.1322 | -62.4051 | -6.93878 | -28.943  | -6.21035 |

|         |   |    |          |          |    |    |    |    |                                                                                                                                                                                                                                                                                                                                                                                                                                                                                                                                                                                                                                                                                                                                                                                                                                                                                                                                                                |          |          |          |          |          |
|---------|---|----|----------|----------|----|----|----|----|----------------------------------------------------------------------------------------------------------------------------------------------------------------------------------------------------------------------------------------------------------------------------------------------------------------------------------------------------------------------------------------------------------------------------------------------------------------------------------------------------------------------------------------------------------------------------------------------------------------------------------------------------------------------------------------------------------------------------------------------------------------------------------------------------------------------------------------------------------------------------------------------------------------------------------------------------------------|----------|----------|----------|----------|----------|
| 13 2VZ6 | 1 | 13 | -6.20651 | 1.902437 | 2  | 3  | 17 | 35 | [[37, 53, 27, 29, 46, 51, 8<br>3, 59, 79, 10], [14, 27, 37<br>, 38, 46, 53, 83, 12, 19, 20<br>, 40, 40, [1, 4, 5, 14, 19,<br>20, 24, 32, 40, 41], [83, 8<br>9, 38, 14, 31, 53, 71, 72, 7<br>7, 27], 36, 36, [48, 22, 23<br>, 33, 35, 49, 52, 60, 84, 88<br>, [36, 88, 7, 8, 9, 10, 11,<br>18, 29, 43], [54, 70, 71, 6<br>, 28, 42, 52, 56, 57, 72]]<br>[[14, 44, 8, 84, 3, 39, 72,<br>85, 83, 25], [3, 64, 84, 8,<br>14, 27, 56, 63, 4, 11], [3,<br>27, 39, 57, 64, 65, 83, 84,<br>85, 4], [98, 100, 49, 78, 9<br>9, 6, 42, 60, 2, 23], [61, 7<br>3, 78, 9, 34, 46, 67, 74, 92<br>, 2]]<br>[[9, 23, 34, 37, 46, 56, 61<br>, 74, 79, 92], 9, 9, [64, 71<br>, 72, 3, 4, 27, 33, 57, 63, 8<br>]]<br>[[92, 46, 93, 73, 78, 2, 9,<br>37, 61, 79], [73, 92, 78, 7<br>9, 106, 2, 34, 37, 53, 55],<br>[12, 41, 48, 51, 52, 54, 10<br>15, 107, 55, 5], [47, 95, 96<br>, 97, 4, 40, 63, 83, 85, 26]<br>, [11, 12], 12, [38, 80, 81<br>, 82, 71, 62, 85, 91, 25, 33<br>]] | 420.5271 | -62.7977 | -5.44437 | -8.15482 | -6.20651 |
| 14 2VZ6 | 1 | 14 | -7.1235  | 6.621377 | 19 | 4  | 38 | 2  | 136.7448                                                                                                                                                                                                                                                                                                                                                                                                                                                                                                                                                                                                                                                                                                                                                                                                                                                                                                                                                       | -52.767  | -5.94754 | -38.6903 | -7.1235  |          |
| 14 2VZ6 | 1 | 14 | -6.50751 | 8.851389 | 19 | 33 | 34 |    | 267.8622                                                                                                                                                                                                                                                                                                                                                                                                                                                                                                                                                                                                                                                                                                                                                                                                                                                                                                                                                       | -41.5717 | -3.44257 | -29.4144 | -6.50751 |          |
| 14 2VZ6 | 1 | 14 | -6.36838 | 5.041188 | 28 | 2  | 13 | 15 | 318.2392                                                                                                                                                                                                                                                                                                                                                                                                                                                                                                                                                                                                                                                                                                                                                                                                                                                                                                                                                       | -46.7473 | -3.70134 | -34.6358 | -6.36838 |          |

|         |   |    |          |          |    |    |    |   |                                                                                                                                                                                                                                                                                                                                                                                                                                                                                                                                                                                                                                                                                                                                                                                                                                                                                                                                                                              |                                                                                                                                                                                                  |          |          |          |          |          |
|---------|---|----|----------|----------|----|----|----|---|------------------------------------------------------------------------------------------------------------------------------------------------------------------------------------------------------------------------------------------------------------------------------------------------------------------------------------------------------------------------------------------------------------------------------------------------------------------------------------------------------------------------------------------------------------------------------------------------------------------------------------------------------------------------------------------------------------------------------------------------------------------------------------------------------------------------------------------------------------------------------------------------------------------------------------------------------------------------------|--------------------------------------------------------------------------------------------------------------------------------------------------------------------------------------------------|----------|----------|----------|----------|----------|
| 14 2VZ6 | 1 | 14 | -6.24584 | 4.857532 | 2  | 13 | 54 | ε | [[37, 77, 79, 100, 2, 49, 6<br>5, 98, 6, 42, 37, 77, 79, 10<br>0, 2, 49, 65, 98, 6, 42], [1<br>3, 7, 32, 42, 43, 66, 70, 86<br>, 88, 29], 7, 7, [86, 7, 43,<br>87, 88, 64, 4, 26, 27, 32],<br>[101, 102, 50, 103, 39, 84<br>, 85, 3, 8, 14, 101, 102, 50<br>, 103, 39, 84, 85, 3, 8, 14]<br>]<br>[[99, 49, 98, 100, 37, 77,<br>78, 79, 2, 61], [77, 78, 99<br>, 37, 60, 61, 74, 90, 92, 2]<br>, [69, 73, 102, 103, 8, 9, 2<br>4, 31, 34, 44], [101, 33, 5<br>0, 71, 72, 84, 102, 103, 39<br>, 83], 14, 14, [51, 104, 12<br>, 41, 48, 53, 55, 106, 65, 5<br>, 51, 104, 12, 41, 48, 53, 5<br>5, 106, 65, 5]]<br>[[49, 58, 65, 67, 7, 19, 25<br>, 26, 28, 43], [7, 26, 43, 4<br>9, 60, 61, 65, 1, 8, 10], [3<br>, 6, 29, 43, 65, 13, 20, 49,<br>50, 72], [45, 12, 15, 39, 4<br>2, 44, 51, 53, 68, 11], [2,<br>18, 47, 48, 66, 4, 38, 28, 3<br>3, 35], [31, 33, 35, 36, 34<br>, 32], [4, 6, 32, 38, 71, 29<br>, 31, 34, 73, 69], [27, 55,<br>62, 63, 64, 44, 46, 7, 12, 1<br>5]] | 313.2203                                                                                                                                                                                         | -34.9966 | -4.42194 | -33.1139 | -6.24584 |          |
| 14 2VZ6 | 1 | 14 | -6.15673 | 8.726407 | 28 | 2  | 13 | 1 | 4, 31, 34, 44], [101, 33, 5<br>0, 71, 72, 84, 102, 103, 39<br>, 83], 14, 14, [51, 104, 12<br>, 41, 48, 53, 55, 106, 65, 5<br>, 51, 104, 12, 41, 48, 53, 5<br>5, 106, 65, 5]]<br>[[49, 58, 65, 67, 7, 19, 25<br>, 26, 28, 43], [7, 26, 43, 4<br>9, 60, 61, 65, 1, 8, 10], [3<br>, 6, 29, 43, 65, 13, 20, 49,<br>50, 72], [45, 12, 15, 39, 4<br>2, 44, 51, 53, 68, 11], [2,<br>18, 47, 48, 66, 4, 38, 28, 3<br>3, 35], [31, 33, 35, 36, 34<br>, 32], [4, 6, 32, 38, 71, 29<br>, 31, 34, 73, 69], [27, 55,<br>62, 63, 64, 44, 46, 7, 12, 1<br>5]]                                                                                                                                                                                                                                                                                                                                                                                                                               | 172.0919                                                                                                                                                                                         | -23.0366 | -4.7661  | -34.4569 | -6.15673 |          |
| 15 2VZ6 | 1 | 15 | -7.71648 | 1.729031 | 2  | 3  | 5  | 7 | ε                                                                                                                                                                                                                                                                                                                                                                                                                                                                                                                                                                                                                                                                                                                                                                                                                                                                                                                                                                            | 2, 44, 51, 53, 68, 11], [2,<br>18, 47, 48, 66, 4, 38, 28, 3<br>3, 35], [31, 33, 35, 36, 34<br>, 32], [4, 6, 32, 38, 71, 29<br>, 31, 34, 73, 69], [27, 55,<br>62, 63, 64, 44, 46, 7, 12, 1<br>5]] | 296.8552 | -71.558  | -8.06922 | -23.562  | -7.71648 |

|         |   |    |          |          |   |   |   |   |   |   |    |    |    |    |    |    |    |    |    |    |    |    |    |    |    |    |    |    |    |    |    |    |    |    |    |    |    |    |    |    |    |    |    |    |    |    |    |    |    |    |    |    |    |    |    |    |    |    |    |    |    |    |    |    |    |    |    |    |    |    |    |    |    |    |    |    |    |    |    |    |    |    |    |    |    |    |    |    |    |    |    |    |    |    |    |    |    |    |    |    |     |     |     |     |     |     |     |     |     |     |     |     |     |     |     |     |     |     |     |     |     |     |     |     |     |     |     |     |     |     |     |     |     |     |     |     |     |     |     |     |     |     |     |     |     |     |     |     |     |     |     |     |     |     |     |     |     |     |     |     |     |     |     |     |     |     |     |     |     |     |     |     |     |     |     |     |     |     |     |     |     |     |     |     |     |     |     |     |     |     |     |     |     |     |     |     |     |     |     |     |     |     |     |     |     |     |     |     |     |     |     |     |     |     |     |     |     |     |     |     |     |     |     |     |     |     |     |     |     |     |     |     |     |     |     |     |     |     |     |     |     |     |     |     |     |     |     |     |     |     |     |     |     |     |     |     |     |     |     |     |     |     |     |     |     |     |     |     |     |     |     |     |     |     |     |     |     |     |     |     |     |     |     |     |     |     |     |     |     |     |     |     |     |     |     |     |     |     |     |     |     |     |     |     |     |     |     |     |     |     |     |     |     |     |     |     |     |     |     |     |     |     |     |     |     |     |     |     |     |     |     |     |     |     |     |     |     |     |     |     |     |     |     |     |     |     |     |     |     |     |     |     |     |     |     |     |     |     |     |     |     |     |     |     |     |     |     |     |     |     |     |     |     |     |     |     |     |     |     |     |     |     |     |     |     |     |     |     |     |     |     |     |     |     |     |     |     |     |     |     |     |     |     |     |     |     |     |     |     |     |     |     |     |     |     |     |     |     |     |     |     |     |     |     |     |     |     |     |     |     |     |     |     |     |     |     |     |     |     |     |     |     |     |     |     |     |     |     |     |     |     |     |     |     |     |     |     |     |     |     |     |     |     |     |     |     |     |     |     |     |     |     |     |     |     |     |     |     |     |     |     |     |     |     |     |     |     |     |     |     |     |     |     |     |     |     |     |     |     |     |     |     |     |     |     |     |     |     |     |     |     |     |     |     |     |     |     |     |     |     |     |       |
|---------|---|----|----------|----------|---|---|---|---|---|---|----|----|----|----|----|----|----|----|----|----|----|----|----|----|----|----|----|----|----|----|----|----|----|----|----|----|----|----|----|----|----|----|----|----|----|----|----|----|----|----|----|----|----|----|----|----|----|----|----|----|----|----|----|----|----|----|----|----|----|----|----|----|----|----|----|----|----|----|----|----|----|----|----|----|----|----|----|----|----|----|----|----|----|----|----|----|----|----|----|----|-----|-----|-----|-----|-----|-----|-----|-----|-----|-----|-----|-----|-----|-----|-----|-----|-----|-----|-----|-----|-----|-----|-----|-----|-----|-----|-----|-----|-----|-----|-----|-----|-----|-----|-----|-----|-----|-----|-----|-----|-----|-----|-----|-----|-----|-----|-----|-----|-----|-----|-----|-----|-----|-----|-----|-----|-----|-----|-----|-----|-----|-----|-----|-----|-----|-----|-----|-----|-----|-----|-----|-----|-----|-----|-----|-----|-----|-----|-----|-----|-----|-----|-----|-----|-----|-----|-----|-----|-----|-----|-----|-----|-----|-----|-----|-----|-----|-----|-----|-----|-----|-----|-----|-----|-----|-----|-----|-----|-----|-----|-----|-----|-----|-----|-----|-----|-----|-----|-----|-----|-----|-----|-----|-----|-----|-----|-----|-----|-----|-----|-----|-----|-----|-----|-----|-----|-----|-----|-----|-----|-----|-----|-----|-----|-----|-----|-----|-----|-----|-----|-----|-----|-----|-----|-----|-----|-----|-----|-----|-----|-----|-----|-----|-----|-----|-----|-----|-----|-----|-----|-----|-----|-----|-----|-----|-----|-----|-----|-----|-----|-----|-----|-----|-----|-----|-----|-----|-----|-----|-----|-----|-----|-----|-----|-----|-----|-----|-----|-----|-----|-----|-----|-----|-----|-----|-----|-----|-----|-----|-----|-----|-----|-----|-----|-----|-----|-----|-----|-----|-----|-----|-----|-----|-----|-----|-----|-----|-----|-----|-----|-----|-----|-----|-----|-----|-----|-----|-----|-----|-----|-----|-----|-----|-----|-----|-----|-----|-----|-----|-----|-----|-----|-----|-----|-----|-----|-----|-----|-----|-----|-----|-----|-----|-----|-----|-----|-----|-----|-----|-----|-----|-----|-----|-----|-----|-----|-----|-----|-----|-----|-----|-----|-----|-----|-----|-----|-----|-----|-----|-----|-----|-----|-----|-----|-----|-----|-----|-----|-----|-----|-----|-----|-----|-----|-----|-----|-----|-----|-----|-----|-----|-----|-----|-----|-----|-----|-----|-----|-----|-----|-----|-----|-----|-----|-----|-----|-----|-----|-----|-----|-----|-----|-----|-----|-----|-----|-----|-----|-----|-----|-----|-----|-----|-----|-----|-----|-----|-----|-----|-----|-----|-----|-----|-----|-----|-----|-----|-----|-----|-----|-----|-----|-----|-----|-----|-----|-----|-----|-----|-----|-----|-----|-----|-----|-----|-----|-----|-----|-----|-----|-----|-----|-----|-----|-----|-----|-----|-----|-----|-----|-----|-----|-----|-----|-----|-----|-----|-----|-----|-----|-----|-----|-----|-----|-----|-----|-----|-----|-----|-----|-----|-----|-----|-----|-----|-----|-----|-----|-----|-----|-----|-------|
| 15 2VZ6 | 1 | 15 | -7.68466 | 1.385858 | 2 | 3 | 5 | 7 | 8 | 9 | 10 | 11 | 12 | 13 | 14 | 15 | 16 | 17 | 18 | 19 | 20 | 21 | 22 | 23 | 24 | 25 | 26 | 27 | 28 | 29 | 30 | 31 | 32 | 33 | 34 | 35 | 36 | 37 | 38 | 39 | 40 | 41 | 42 | 43 | 44 | 45 | 46 | 47 | 48 | 49 | 50 | 51 | 52 | 53 | 54 | 55 | 56 | 57 | 58 | 59 | 60 | 61 | 62 | 63 | 64 | 65 | 66 | 67 | 68 | 69 | 70 | 71 | 72 | 73 | 74 | 75 | 76 | 77 | 78 | 79 | 80 | 81 | 82 | 83 | 84 | 85 | 86 | 87 | 88 | 89 | 90 | 91 | 92 | 93 | 94 | 95 | 96 | 97 | 98 | 99 | 100 | 101 | 102 | 103 | 104 | 105 | 106 | 107 | 108 | 109 | 110 | 111 | 112 | 113 | 114 | 115 | 116 | 117 | 118 | 119 | 120 | 121 | 122 | 123 | 124 | 125 | 126 | 127 | 128 | 129 | 130 | 131 | 132 | 133 | 134 | 135 | 136 | 137 | 138 | 139 | 140 | 141 | 142 | 143 | 144 | 145 | 146 | 147 | 148 | 149 | 150 | 151 | 152 | 153 | 154 | 155 | 156 | 157 | 158 | 159 | 160 | 161 | 162 | 163 | 164 | 165 | 166 | 167 | 168 | 169 | 170 | 171 | 172 | 173 | 174 | 175 | 176 | 177 | 178 | 179 | 180 | 181 | 182 | 183 | 184 | 185 | 186 | 187 | 188 | 189 | 190 | 191 | 192 | 193 | 194 | 195 | 196 | 197 | 198 | 199 | 200 | 201 | 202 | 203 | 204 | 205 | 206 | 207 | 208 | 209 | 210 | 211 | 212 | 213 | 214 | 215 | 216 | 217 | 218 | 219 | 220 | 221 | 222 | 223 | 224 | 225 | 226 | 227 | 228 | 229 | 230 | 231 | 232 | 233 | 234 | 235 | 236 | 237 | 238 | 239 | 240 | 241 | 242 | 243 | 244 | 245 | 246 | 247 | 248 | 249 | 250 | 251 | 252 | 253 | 254 | 255 | 256 | 257 | 258 | 259 | 260 | 261 | 262 | 263 | 264 | 265 | 266 | 267 | 268 | 269 | 270 | 271 | 272 | 273 | 274 | 275 | 276 | 277 | 278 | 279 | 280 | 281 | 282 | 283 | 284 | 285 | 286 | 287 | 288 | 289 | 290 | 291 | 292 | 293 | 294 | 295 | 296 | 297 | 298 | 299 | 300 | 301 | 302 | 303 | 304 | 305 | 306 | 307 | 308 | 309 | 310 | 311 | 312 | 313 | 314 | 315 | 316 | 317 | 318 | 319 | 320 | 321 | 322 | 323 | 324 | 325 | 326 | 327 | 328 | 329 | 330 | 331 | 332 | 333 | 334 | 335 | 336 | 337 | 338 | 339 | 340 | 341 | 342 | 343 | 344 | 345 | 346 | 347 | 348 | 349 | 350 | 351 | 352 | 353 | 354 | 355 | 356 | 357 | 358 | 359 | 360 | 361 | 362 | 363 | 364 | 365 | 366 | 367 | 368 | 369 | 370 | 371 | 372 | 373 | 374 | 375 | 376 | 377 | 378 | 379 | 380 | 381 | 382 | 383 | 384 | 385 | 386 | 387 | 388 | 389 | 390 | 391 | 392 | 393 | 394 | 395 | 396 | 397 | 398 | 399 | 400 | 401 | 402 | 403 | 404 | 405 | 406 | 407 | 408 | 409 | 410 | 411 | 412 | 413 | 414 | 415 | 416 | 417 | 418 | 419 | 420 | 421 | 422 | 423 | 424 | 425 | 426 | 427 | 428 | 429 | 430 | 431 | 432 | 433 | 434 | 435 | 436 | 437 | 438 | 439 | 440 | 441 | 442 | 443 | 444 | 445 | 446 | 447 | 448 | 449 | 450 | 451 | 452 | 453 | 454 | 455 | 456 | 457 | 458 | 459 | 460 | 461 | 462 | 463 | 464 | 465 | 466 | 467 | 468 | 469 | 470 | 471 | 472 | 473 | 474 | 475 | 476 | 477 | 478 | 479 | 480 | 481 | 482 | 483 | 484 | 485 | 486 | 487 | 488 | 489 | 490 | 491 | 492 | 493 | 494 | 495 | 496 | 497 | 498 | 499 | 500 | 501 | 502 | 503 | 504 | 505 | 506 | 507 | 508 | 509 | 510 | 511 | 512 | 513 | 514 | 515 | 516 | 517 | 518 | 519 | 520 | 521</ |
|---------|---|----|----------|----------|---|---|---|---|---|---|----|----|----|----|----|----|----|----|----|----|----|----|----|----|----|----|----|----|----|----|----|----|----|----|----|----|----|----|----|----|----|----|----|----|----|----|----|----|----|----|----|----|----|----|----|----|----|----|----|----|----|----|----|----|----|----|----|----|----|----|----|----|----|----|----|----|----|----|----|----|----|----|----|----|----|----|----|----|----|----|----|----|----|----|----|----|----|----|----|----|-----|-----|-----|-----|-----|-----|-----|-----|-----|-----|-----|-----|-----|-----|-----|-----|-----|-----|-----|-----|-----|-----|-----|-----|-----|-----|-----|-----|-----|-----|-----|-----|-----|-----|-----|-----|-----|-----|-----|-----|-----|-----|-----|-----|-----|-----|-----|-----|-----|-----|-----|-----|-----|-----|-----|-----|-----|-----|-----|-----|-----|-----|-----|-----|-----|-----|-----|-----|-----|-----|-----|-----|-----|-----|-----|-----|-----|-----|-----|-----|-----|-----|-----|-----|-----|-----|-----|-----|-----|-----|-----|-----|-----|-----|-----|-----|-----|-----|-----|-----|-----|-----|-----|-----|-----|-----|-----|-----|-----|-----|-----|-----|-----|-----|-----|-----|-----|-----|-----|-----|-----|-----|-----|-----|-----|-----|-----|-----|-----|-----|-----|-----|-----|-----|-----|-----|-----|-----|-----|-----|-----|-----|-----|-----|-----|-----|-----|-----|-----|-----|-----|-----|-----|-----|-----|-----|-----|-----|-----|-----|-----|-----|-----|-----|-----|-----|-----|-----|-----|-----|-----|-----|-----|-----|-----|-----|-----|-----|-----|-----|-----|-----|-----|-----|-----|-----|-----|-----|-----|-----|-----|-----|-----|-----|-----|-----|-----|-----|-----|-----|-----|-----|-----|-----|-----|-----|-----|-----|-----|-----|-----|-----|-----|-----|-----|-----|-----|-----|-----|-----|-----|-----|-----|-----|-----|-----|-----|-----|-----|-----|-----|-----|-----|-----|-----|-----|-----|-----|-----|-----|-----|-----|-----|-----|-----|-----|-----|-----|-----|-----|-----|-----|-----|-----|-----|-----|-----|-----|-----|-----|-----|-----|-----|-----|-----|-----|-----|-----|-----|-----|-----|-----|-----|-----|-----|-----|-----|-----|-----|-----|-----|-----|-----|-----|-----|-----|-----|-----|-----|-----|-----|-----|-----|-----|-----|-----|-----|-----|-----|-----|-----|-----|-----|-----|-----|-----|-----|-----|-----|-----|-----|-----|-----|-----|-----|-----|-----|-----|-----|-----|-----|-----|-----|-----|-----|-----|-----|-----|-----|-----|-----|-----|-----|-----|-----|-----|-----|-----|-----|-----|-----|-----|-----|-----|-----|-----|-----|-----|-----|-----|-----|-----|-----|-----|-----|-----|-----|-----|-----|-----|-----|-----|-----|-----|-----|-----|-----|-----|-----|-----|-----|-----|-----|-----|-----|-----|-----|-----|-----|-----|-----|-----|-----|-----|-----|-----|-----|-----|-----|-----|-----|-----|-----|-----|-----|-----|-----|-----|-----|-----|-----|-----|-----|-----|-----|-----|-----|-----|-----|-----|-----|-----|-----|-----|-----|-----|-----|-----|-----|-----|-----|-------|

|         |   |                                 |                                                                                                                                                                                                                                                                                                                                                                 |                                              |
|---------|---|---------------------------------|-----------------------------------------------------------------------------------------------------------------------------------------------------------------------------------------------------------------------------------------------------------------------------------------------------------------------------------------------------------------|----------------------------------------------|
| 16 2VZ6 | 1 | 16 -7.54022 3.863869 2 3 19 4   | [[64, 92, 1, 14, 17, 57, 87, 90, 97, 98], [1, 9, 14, 49, 57, 60, 63, 64, 87, 92], [6, 9, 23, 32, 33, 34, 39, 43, 49, 60], [3, 6, 21, 34, 41, 43, 49, 61, 69, 77], [10, 12, 14, 23, 13, 11], [7, 36, 46, 50, 68, 82, 16, 27, 55, 80], [82, 81, 10, 12, 88, 90, 11, 89, 7, 80], [93, 15, 48, 54, 59, 25, 26, 31, 52, 85, 93, 15, 48, 54, 59, 25, 26, 31, 52, 85]] | 346.5084 -48.1639 -2.06745 -28.3616 -7.54022 |
| 16 2VZ6 | 1 | 16 -7.05873 2.553166 2 32 13 14 | [[55, 97, 98, 12, 14, 17, 2, 3, 27, 49, 90, 55, 97, 98, 1, 2, 14, 17, 23, 27, 49, 90], [10, 12, 14, 23, 13, 11], [143, 75, 79, 101, 13, 91, 5, 19, 23, 34], [75, 5, 66, 67, 76, 100, 74, 2, 18, 19], 4, 5, 45, [79, 77, 74, 6, 44, 4, 5, 78, 94, 15, 26]]                                                                                                       | 311.148 -13.9305 -3.90597 -43.7127 -7.05873  |
| 16 2VZ6 | 1 | 16 -6.22707 3.891316 28 2 13 14 | [[4, 71, 72, 22, 42, 52, 84, 8, 47, 51], [52, 84, 24, 5, 4, 59, 93, 95, 8, 26, 31], [20, 25, 40, 44, 53, 76, 94, 5, 15, 19], [5, 74, 75, 76, 77, 44, 6, 78, 79, 19], 43, 43, [41, 13, 91, 11, 14, 23, 34, 89, 43, 21]]                                                                                                                                          | 308.8383 -27.684 -1.47734 -34.982 -6.22707   |

|         |   |                                |                                                                                                                                                                                                                                                                                                                                                                                                                                                                                                                                                                                                                                                                                                                                                                                                                   |                                           |
|---------|---|--------------------------------|-------------------------------------------------------------------------------------------------------------------------------------------------------------------------------------------------------------------------------------------------------------------------------------------------------------------------------------------------------------------------------------------------------------------------------------------------------------------------------------------------------------------------------------------------------------------------------------------------------------------------------------------------------------------------------------------------------------------------------------------------------------------------------------------------------------------|-------------------------------------------|
| 16 2VZ6 | 1 | 16 -6.09373 2.369942 2 3 33 34 | [[63, 89, 91, 86, 1, 13, 62, 9, 11, 23], [1, 9, 11, 13, 14, 23, 32, 34, 39, 49], 42, 42, [4, 8, 18, 22, 29, 30, 37, 39, 42, 47], [9, 86, 87, 63, 1, 5, 39, 44, 64, 75], [52, 95, 16, 24, 47, 54, 56, 59, 96, 28], [80, 82, 7, 8, 1, 27, 46, 50, 55, 69, 17]]<br>[[52, 71, 95, 56, 4, 16, 24, 47, 51, 72], [24, 47, 52, 54, 59, 93, 95, 8, 15, 26], 48, 48, [2, 20, 25, 40, 48, 53, 65, 66, 67, 93], [85, 87, 8, 9, 58, 66, 83, 86, 84, 2], [1, 62, 64, 5, 44, 75, 76, 9, 19, 39, 1, 62, 64, 5, 4, 75, 76, 9, 19, 39], [10, 12, 14, 23, 13, 11]]<br>[[51, 70, 8, 9, 17, 29, 30, 57, 68, 73], [3, 8, 9, 30, 47, 51, 57, 60, 68, 70], [7, 13, 16, 22, 26, 27, 32, 46, 47, 49], [30, 73, 23, 45, 68, 77, 14, 24, 51, 37], [42, 2, 4, 43, 44, 48, 50, 55, 1, 5], 27, 27, 28, [61, 76, 19, 20, 28, 33, 53, 62, 63, 75]] | 395.6304 -13.2026 -1.68 3.157182 -6.09373 |
| 16 2VZ6 | 1 | 16 -6.01965 4.914754 2 3 17 18 | 333.587 -32.6855 -2.66752 -22.5117 -6.01965                                                                                                                                                                                                                                                                                                                                                                                                                                                                                                                                                                                                                                                                                                                                                                       |                                           |
| 17 2VZ6 | 1 | 17 -6.98415 1.936173 2 3 4 5 7 | 207.4409 -71.0803 -7.50531 -23.4347 -6.98415                                                                                                                                                                                                                                                                                                                                                                                                                                                                                                                                                                                                                                                                                                                                                                      |                                           |



|         |   |                                |                                                                                                                                                                                                                                                                                           |                                              |
|---------|---|--------------------------------|-------------------------------------------------------------------------------------------------------------------------------------------------------------------------------------------------------------------------------------------------------------------------------------------|----------------------------------------------|
| 17 2VZ6 | 1 | 17 -6.65188 1.443182 2 3 4 5 6 | [[51, 68, 72, 8, 9, 21, 24, 29, 30, 57], [3, 8, 9, 23, 30, 47, 51, 57, 60, 68], [7, 13, 18, 22, 26, 36, 46, 47, 49, 58], [30, 73, 79, 23, 32, 45, 68, 14, 24, 26], [34, 38, 40, 41, 39, 37], [42, 1, 2, 5, 43, 44, 48, 50, 4, 6], [44, 70, 81, 25, 55, 24, 31, 34, 38, 40]]               | 225.605 -110.844 -8.69082 -12.6513 -6.65188  |
| 17 2VZ6 | 1 | 17 -6.41208 2.284023 2 3 17 4  | [[79, 46, 66, 7, 16, 26, 27, 32, 36, 47], [13, 18, 26, 30, 32, 36, 46, 47, 49, 58], 30, [3, 8, 9, 11, 17, 18, 21, 29, 51, 56], 28, 28, [43, 2, 4, 6, 11, 42, 44, 52, 63, 1], [48, 54, 65, 67, 12, 53, 5, 22, 66, 13], [38, 40, 81, 83, 34, 37, 25, 31, 45, 24], [34, 38, 40, 41, 39, 37]] | 213.6538 -84.6822 -8.05098 -25.5039 -6.41208 |
| 17 2VZ6 | 1 | 17 -6.3428 1.812543 2 3 4 48   | [[38, 40, 81, 83, 34, 41, 79, 84], [38, 81, 15, 25, 31, 34, 35, 40, 55, 79], [2, 6, 15, 24, 25, 31, 35, 42, 43, 44], 30, 30, [68, 45, 73, 37, 39, 41, 80, 82, 24, 51], [58, 46, 67, 13, 26, 30, 32, 47, 49, 36]]                                                                          | 200.2595 -47.7234 -7.69956 -25.5537 -6.3428  |

|         |   |                                |                                                                                                                                                                                                                                                                                                                                                                                                                                                                                                                                                                                                                                                                                                                                                                                                                                                                                                                                                                                                                                                        |                                              |
|---------|---|--------------------------------|--------------------------------------------------------------------------------------------------------------------------------------------------------------------------------------------------------------------------------------------------------------------------------------------------------------------------------------------------------------------------------------------------------------------------------------------------------------------------------------------------------------------------------------------------------------------------------------------------------------------------------------------------------------------------------------------------------------------------------------------------------------------------------------------------------------------------------------------------------------------------------------------------------------------------------------------------------------------------------------------------------------------------------------------------------|----------------------------------------------|
| 17 2VZ6 | 1 | 17 -6.17898 1.631527 2 3 45 12 | [[73, 14, 23, 24, 30, 45, 5<br>1, 68, 8, 78, 73, 14, 23, 24<br>, 30, 45, 51, 68, 8, 78], [3<br>9, 40, 41, 83, 84, 34, 37, 3<br>8, 82], [34, 38, 40, 41, 39<br>, 37], [70, 72, 29, 43, 64,<br>71, 75, 4, 11, 20], [2, 6, 3<br>5, 42, 43, 44, 55, 52, 15, 2<br>5], [54, 53, 5, 12, 42, 43,<br>48, 13, 19, 62]]<br>[[31, 49, 2, 34, 38, 45, 7,<br>10, 32, 52], [2, 10, 14, 31<br>, 32, 34, 44, 45, 49, 52], [<br>44, 45, 6, 14, 15, 16, 42, 4<br>7, 49, 2], 24, 24, [56, 57,<br>3, 8, 23, 33, 36, 55, 61, 63<br>, [18, 39, 48, 50, 51, 60,<br>25, 6, 16, 22]]<br>[[3, 8, 23, 25, 33, 36, 50,<br>57, 59, 9], 13, 13, [4, 5, 1<br>1, 13, 20, 21, 27, 30, 35, 3<br>6], [4, 10, 19, 31, 32, 34,<br>38, 52, 2, 7], [46, 15, 42,<br>44, 47, 2, 6, 14, 16, 22]]<br>[[31, 49, 2, 34, 38, 45, 7,<br>10, 32, 39], [2, 10, 14, 31<br>, 32, 34, 44, 45, 49, 52], [<br>4, 5, 11, 13, 21, 32, 37, 40<br>, 41, 53], [45, 44, 6, 14, 1<br>5, 16, 31, 42, 47, 49], 24,<br>24, [56, 57, 3, 8, 23, 33, 3<br>6, 61, 63, 17], [18, 33, 39<br>, 48, 50, 51, 60, 25, 6, 16]<br>] | 188.9334 -109.779 -7.96557 -29.2453 -6.17898 |
| 18 2VZ6 | 1 | 18 -6.30995 3.155664 2 3 5 6 2 | [[31, 49, 2, 34, 38, 45, 7,<br>10, 32, 52], [2, 10, 14, 31<br>, 32, 34, 44, 45, 49, 52], [<br>44, 45, 6, 14, 15, 16, 42, 4<br>7, 49, 2], 24, 24, [56, 57,<br>3, 8, 23, 33, 36, 55, 61, 63<br>, [18, 39, 48, 50, 51, 60,<br>25, 6, 16, 22]]<br>[[3, 8, 23, 25, 33, 36, 50,<br>57, 59, 9], 13, 13, [4, 5, 1<br>1, 13, 20, 21, 27, 30, 35, 3<br>6], [4, 10, 19, 31, 32, 34,<br>38, 52, 2, 7], [46, 15, 42,<br>44, 47, 2, 6, 14, 16, 22]]<br>[[31, 49, 2, 34, 38, 45, 7,<br>10, 32, 39], [2, 10, 14, 31<br>, 32, 34, 44, 45, 49, 52], [<br>4, 5, 11, 13, 21, 32, 37, 40<br>, 41, 53], [45, 44, 6, 14, 1<br>5, 16, 31, 42, 47, 49], 24,<br>24, [56, 57, 3, 8, 23, 33, 3<br>6, 61, 63, 17], [18, 33, 39<br>, 48, 50, 51, 60, 25, 6, 16]<br>]                                                                                                                                                                                                                                                                                                                 | 756.9987 -68.8773 -7.51125 -15.6186 -6.30995 |
| 18 2VZ6 | 1 | 18 -6.26746 3.563006 3 33 34 4 | [[31, 49, 2, 34, 38, 45, 7,<br>10, 32, 39], [2, 10, 14, 31<br>, 32, 34, 44, 45, 49, 52], [<br>4, 5, 11, 13, 21, 32, 37, 40<br>, 41, 53], [45, 44, 6, 14, 1<br>5, 16, 31, 42, 47, 49], 24,<br>24, [56, 57, 3, 8, 23, 33, 3<br>6, 61, 63, 17], [18, 33, 39<br>, 48, 50, 51, 60, 25, 6, 16]<br>]                                                                                                                                                                                                                                                                                                                                                                                                                                                                                                                                                                                                                                                                                                                                                          | 421.1323 -56.3414 -7.10535 -24.4154 -6.26746 |
| 18 2VZ6 | 1 | 18 -6.19427 1.519622 2 3 4 5 6 | [[31, 49, 2, 34, 38, 45, 7,<br>10, 32, 39], [2, 10, 14, 31<br>, 32, 34, 44, 45, 49, 52], [<br>4, 5, 11, 13, 21, 32, 37, 40<br>, 41, 53], [45, 44, 6, 14, 1<br>5, 16, 31, 42, 47, 49], 24,<br>24, [56, 57, 3, 8, 23, 33, 3<br>6, 61, 63, 17], [18, 33, 39<br>, 48, 50, 51, 60, 25, 6, 16]<br>]                                                                                                                                                                                                                                                                                                                                                                                                                                                                                                                                                                                                                                                                                                                                                          | 757.2541 -69.7856 -7.82523 -14.5658 -6.19427 |

|         |   |    |          |          |   |   |    |    |                                                                                                                                                                                                                                                                                                   |          |          |          |          |          |
|---------|---|----|----------|----------|---|---|----|----|---------------------------------------------------------------------------------------------------------------------------------------------------------------------------------------------------------------------------------------------------------------------------------------------------|----------|----------|----------|----------|----------|
| 18 2VZ6 | 1 | 18 | -5.36194 | 1.194003 | 2 | 3 | 6  | 20 | [[14, 31, 44, 45, 49, 2, 6, 16, 32, 34], [1, 2, 4, 5, 14, 31, 32, 34, 37, 43], 24, 24, [33, 56, 57, 3, 8, 23, 36, 59, 7, 17], [22, 18, 39, 4, 6, 50, 51, 61, 6, 15, 16], [68, 30, 29, 62, 67, 69, 24, 26, 58, 19]]                                                                                | 789.3881 | -78.5848 | -7.69112 | -10.6414 | -5.36194 |
| 18 2VZ6 | 1 | 18 | -5.28275 | 1.739983 | 2 | 3 | 7  |    | [[50, 18, 51, 61, 3, 9, 23, 25, 36, 57], [3, 9, 18, 23, 33, 36, 50, 51, 56, 57], [3, 2, 66, 1, 2, 4, 28, 31, 34, 3, 7, 38]]                                                                                                                                                                       | 744.3671 | -69.9888 | -8.28027 | -4.75918 | -5.28275 |
| 19 2VZ6 | 1 | 19 | -6.30484 | 3.584318 | 2 | 3 | 17 | 7  | [[28, 33, 36, 59, 3, 8, 19, 43, 44, 45], [8, 19, 28, 43, 44, 45, 49, 59, 71, 2], 17, [32, 77, 26, 29, 70, 72, 80, 47, 50, 60], [73, 30, 34, 37, 72, 78, 33, 35, 36, 38], [61, 23, 54, 66, 11, 14, 21, 55, 53, 12]]                                                                                | 212.4279 | -105.192 | -7.15301 | -19.2075 | -6.30484 |
| 19 2VZ6 | 1 | 19 | -6.22322 | 1.998948 | 2 | 3 | 4  | 5  | 7[[46, 69, 71, 10, 11, 17, 25, 27, 32, 55], [4, 10, 11, 26, 32, 46, 47, 55, 62, 69], [9, 13, 22, 29, 37, 47, 50, 60, 64, 65], [32, 77, 80, 26, 34, 70, 18, 27, 29, 46], [44, 3, 43, 45, 48, 51, 59, 1, 2, 5], [45, 67, 82, 28, 59, 27, 33, 35, 39, 69], [66, 23, 75, 74, 15, 16, 24, 31, 56, 58]] | 193.2816 | -94.647  | -7.10536 | -9.67208 | -6.22322 |

|         |   |    |          |          |   |    |    |    |                                                                                                                                                                                                                                                                                                                                                                                                                                                                                                                                                                                                                                                                                                                                                                                           |                                                                                                                                                           |          |          |          |          |          |
|---------|---|----|----------|----------|---|----|----|----|-------------------------------------------------------------------------------------------------------------------------------------------------------------------------------------------------------------------------------------------------------------------------------------------------------------------------------------------------------------------------------------------------------------------------------------------------------------------------------------------------------------------------------------------------------------------------------------------------------------------------------------------------------------------------------------------------------------------------------------------------------------------------------------------|-----------------------------------------------------------------------------------------------------------------------------------------------------------|----------|----------|----------|----------|----------|
| 19 2VZ6 | 1 | 19 | -6.10184 | 2.57528  | 2 | 3  | 33 | 38 | [[39, 41, 42, 82, 84, 33, 3<br>5, 38, 40, 81], [39, 41, 82<br>, 84, 27, 28, 35, 70, 80, 33<br>, 32, [21, 25, 32, 46, 60,<br>62, 67, 68, 69, 10], [37, 7<br>8, 79, 34, 73, 29, 72, 80, 7<br>7, 20], [48, 51, 9, 44, 52,<br>59, 1, 3, 5, 8]]<br>[[43, 45, 49, 69, 2, 7, 8, 4<br>4, 58, 76], [41, 84, 27, 39<br>, 42, 71, 82, 32, 70, 78], [<br>27, 32, 46, 62, 67, 71, 77,<br>25, 68, 7], [61, 21, 54, 60<br>, 62, 14, 66, 11, 23, 55], 3<br>2, 32, [78, 84, 26, 32, 34,<br>37, 70, 77, 79, 29]]<br>[[23, 53, 66, 5, 12, 13, 47<br>, 50, 64, 1], [4, 11, 13, 21<br>, 23, 47, 50, 61, 66, 72], [<br>21, 61, 11, 14, 23, 54, 62,<br>66, 76, 15], 19, [45, 49, 3<br>, 7, 8, 25, 27, 43, 44, 59],<br>[52, 12, 16, 24, 43, 56, 58<br>, 57, 6, 15], [36, 81, 33, 3<br>5, 37, 38, 79, 80, 19, 20]] | 187.6161                                                                                                                                                  | -57.7349 | -7.57912 | -28.8531 | -6.10184 |          |
| 19 2VZ6 | 1 | 19 | -6.01076 | 0.989188 | 2 | 12 | 13 | 1  | [[23, 53, 66, 5, 12, 13, 47<br>, 50, 64, 1], [4, 11, 13, 21<br>, 23, 47, 50, 61, 66, 72], [<br>21, 61, 11, 14, 23, 54, 62,<br>66, 76, 15], 19, [45, 49, 3<br>, 7, 8, 25, 27, 43, 44, 59],<br>[52, 12, 16, 24, 43, 56, 58<br>, 57, 6, 15], [36, 81, 33, 3<br>5, 37, 38, 79, 80, 19, 20]]                                                                                                                                                                                                                                                                                                                                                                                                                                                                                                   | 172.1992                                                                                                                                                  | -62.3697 | -8.01634 | -34.8303 | -6.01076 |          |
| 19 2VZ6 | 1 | 19 | -6.00393 | 2.772542 | 2 | 3  | 5  | 6  | 7                                                                                                                                                                                                                                                                                                                                                                                                                                                                                                                                                                                                                                                                                                                                                                                         | 66, 76, 15], 19, [45, 49, 3<br>, 7, 8, 25, 27, 43, 44, 59],<br>[52, 12, 16, 24, 43, 56, 58<br>, 57, 6, 15], [36, 81, 33, 3<br>5, 37, 38, 79, 80, 19, 20]] | 221.0561 | -128.058 | -8.45247 | -9.56061 | -6.00393 |

|         |   |    |          |          |   |    |    |                                                                                                                                    |                                                                                                                                                                                                                                                                                                      |          |          |          |          |          |
|---------|---|----|----------|----------|---|----|----|------------------------------------------------------------------------------------------------------------------------------------|------------------------------------------------------------------------------------------------------------------------------------------------------------------------------------------------------------------------------------------------------------------------------------------------------|----------|----------|----------|----------|----------|
| 20 2VZ6 | 1 | 20 | -7.24016 | 3.908734 | 1 | 2  | 3  | 33                                                                                                                                 | [12, [41, 55, 12, 20, 21, 27, 40, 10, 11, 13], [12, 19, 21, 27, 40, 41, 55, 10, 11, 13], 30, [6, 8, 17, 18, 19, 30, 35, 37, 38, 39], 48, 48, [58, 15, 18, 31, 48, 82, 88, 89, 16, 32], [70, 46, 87, 42, 43, 44, 45, 84, 85, 40], [42, 47, 46, 45, 44, 43], [73, 74, 28, 29, 33, 67, 22, 23, 24, 61]] | 172.915  | -76.2276 | -7.01065 | -28.4006 | -7.24016 |
| 20 2VZ6 | 1 | 20 | -7.10836 | 1.625477 | 2 | 3  | 4  | 5                                                                                                                                  | 7, [[89, 26, 37, 38, 75, 82, 9, 18, 30, 35], [9, 15, 22, 24, 26, 37, 38, 48, 61, 63], [14, 16, 28, 29, 32, 33, 56, 59, 61, 66], [48, 71, 89, 15, 31, 38, 58, 7, 16, 37], [21, 10, 17, 19, 53, 55, 57, 4, 5, 6], [81, 19, 27, 83, 88, 55, 18, 37, 39, 40], 34]                                        | 177.9036 | -75.4021 | -7.37989 | -16.2239 | -7.10836 |
| 20 2VZ6 | 1 | 20 | -7.06188 | 1.159786 | 2 | 12 | 13 | 158, 82], [26, 37, 38, 48, 74, 76, 82, 89, 39, 9], [73, 33, 62, 72, 74, 23, 24, 51, 63, 2], [52, 51, 2, 64, 80, 36, 1, 3, 25, 34]] | 144.472                                                                                                                                                                                                                                                                                              | -60.3085 | -7.70365 | -38.8056 | -7.06188 |          |

|         |   |    |          |          |   |    |    |                                                                                                                                                                                                                                                                                                                                        |          |          |          |          |          |
|---------|---|----|----------|----------|---|----|----|----------------------------------------------------------------------------------------------------------------------------------------------------------------------------------------------------------------------------------------------------------------------------------------------------------------------------------------|----------|----------|----------|----------|----------|
| 20 2VZ6 | 1 | 20 | -7.00619 | 1.853223 | 2 | 12 | 40 | [[19, 11, 21, 54, 55, 75, 8<br>1, 7, 8, 10, 19, 11, 21, 54,<br>55, 75, 81, 7, 8, 10], [87,<br>46, 39, 45, 47, 58, 71, 82,<br>183, 86], 38, [26, 37, 38, 4<br>8, 74, 89, 82, 7, 9, 15], [7<br>3, 33, 62, 72, 74, 24, 63, 2<br>3, 51, 2], [52, 51, 2, 25, 3<br>4, 64, 80, 36, 1, 3]]                                                     | 148.9106 | -75.7355 | -8.55902 | -35.5595 | -7.00619 |
| 20 2VZ6 | 1 | 20 | -6.8885  | 1.706525 | 2 | 13 | 14 | [[19, 11, 17, 21, 54, 55, 7<br>7, 7, 8, 10, 19, 11, 17, 21,<br>54, 55, 77, 7, 8, 10], [26,<br>37, 39, 73, 81, 82, 83, 38,<br>9, 30], [72, 33, 62, 73, 74<br>, 63, 23, 3, 24, 51], [51, 2<br>, 49, 52, 64, 80, 1, 50, 25,<br>34]]                                                                                                       | 153.1002 | -42.0407 | -7.1302  | -37.1581 | -6.8885  |
| 21 2VZ6 | 1 | 21 | -8.79148 | 2.175096 | 2 | 3  | 4  | [[94, 95, 98, 45, 47, 43, 9<br>6, 49, 99, 97], [35, 45, 79<br>, 94, 95, 16, 26, 28, 31, 62<br>, [6, 8, 9, 15, 16, 20, 28,<br>31, 34, 35], [35, 42, 45, 4<br>76, 94, 99, 49, 98, 97, 37],<br>[69, 48, 67, 73, 37, 40, 41<br>, 44, 91, 92], [91, 96, 97,<br>39, 42, 45, 46, 47, 49, 98]<br>, [11, 13, 23, 51, 58, 74, 5<br>, 55, 57, 1]] | 146.6967 | -71.0575 | -8.42777 | -41.5502 | -8.79148 |

|         |   |                                |                                                                                                                                                                                                                                                                                                                                                                                                                                                                                                                                                                                                                                                                                                                                                                                                                                                                                                                                                |                                              |
|---------|---|--------------------------------|------------------------------------------------------------------------------------------------------------------------------------------------------------------------------------------------------------------------------------------------------------------------------------------------------------------------------------------------------------------------------------------------------------------------------------------------------------------------------------------------------------------------------------------------------------------------------------------------------------------------------------------------------------------------------------------------------------------------------------------------------------------------------------------------------------------------------------------------------------------------------------------------------------------------------------------------|----------------------------------------------|
| 21 2VZ6 | 1 | 21 -7.92871 2.671835 2 3 17 12 | [[6, 8, 15, 18, 25, 56, 61, 77, 79, 81, 6, 8, 15, 18, 25, 56, 61, 77, 79, 81], [56, 61, 79, 81, 34, 48, 31, 37, 38, 40], 48, [87, 36, 53, 8, 8, 89, 30, 33, 76, 57, 71], [17, 53, 54, 55, 57, 64, 65, 72, 73, 1], [72, 74, 12, 2, 3, 59, 66, 73, 13, 60, 5], [41, 44, 92, 93, 38, 90, 40, 91, 37, 46], [11, 22, 53, 5, 7, 58, 71, 73, 30, 33, 87]]<br>[[46, 97, 99, 35, 37, 39, 4, 2, 49, 34, 40], 35, 35, 35, 35, [20, 28, 31, 35, 43, 47, 48, 62, 68, 69], [94, 95, 43, 48, 45, 47, 81, 39, 42, 96], [32, 70, 84, 10, 21, 2, 9, 51, 52, 4, 22], [83, 27, 50, 82, 90, 92, 73, 38, 40, 41]]<br>[[60, 3, 12, 50, 67, 69, 73, 82, 1, 4, 60, 3, 12, 50, 67, 69, 73, 82, 1, 4], [40, 46, 69, 34, 37, 39, 42, 44, 91, 93], 46, 46, [77, 25, 61, 6, 8, 14, 15, 18, 27, 52], [6, 8, 15, 56, 61, 63, 79, 83, 18, 27], [48, 43, 47, 95, 39, 40, 91, 94, 45, 42], [8, 3, 90, 92, 38, 41, 27, 81, 8, 2, 44, 93], [75, 61, 15, 24, 76, 79, 53, 6, 14, 25]] | 144.1324 -67.7891 -6.01392 -48.922 -7.92871  |
| 21 2VZ6 | 1 | 21 -7.64622 2.772712 3 17 18 5 | [[60, 3, 12, 50, 67, 69, 73, 82, 1, 4, 60, 3, 12, 50, 67, 69, 73, 82, 1, 4], [40, 46, 69, 34, 37, 39, 42, 44, 91, 93], 46, 46, [77, 25, 61, 6, 8, 14, 15, 18, 27, 52], [6, 8, 15, 56, 61, 63, 79, 83, 18, 27], [48, 43, 47, 95, 39, 40, 91, 94, 45, 42], [8, 3, 90, 92, 38, 41, 27, 81, 8, 2, 44, 93], [75, 61, 15, 24, 76, 79, 53, 6, 14, 25]]                                                                                                                                                                                                                                                                                                                                                                                                                                                                                                                                                                                                | 151.8187 -44.2455 -5.95785 -43.8523 -7.64622 |
| 21 2VZ6 | 1 | 21 -7.5398 1.671246 2 3 17 18  | [[60, 3, 12, 50, 67, 69, 73, 82, 1, 4, 60, 3, 12, 50, 67, 69, 73, 82, 1, 4], [40, 46, 69, 34, 37, 39, 42, 44, 91, 93], 46, 46, [77, 25, 61, 6, 8, 14, 15, 18, 27, 52], [6, 8, 15, 56, 61, 63, 79, 83, 18, 27], [48, 43, 47, 95, 39, 40, 91, 94, 45, 42], [8, 3, 90, 92, 38, 41, 27, 81, 8, 2, 44, 93], [75, 61, 15, 24, 76, 79, 53, 6, 14, 25]]                                                                                                                                                                                                                                                                                                                                                                                                                                                                                                                                                                                                | 156.5533 -52.8484 -5.97291 -45.8336 -7.5398  |

|         |   |    |          |          |   |    |    |    |                                                                                                                                                                                                                                                                                                                                                                                                                                                                                                                                                                                                                                                                                                                                                                                                                                                        |          |          |          |          |          |
|---------|---|----|----------|----------|---|----|----|----|--------------------------------------------------------------------------------------------------------------------------------------------------------------------------------------------------------------------------------------------------------------------------------------------------------------------------------------------------------------------------------------------------------------------------------------------------------------------------------------------------------------------------------------------------------------------------------------------------------------------------------------------------------------------------------------------------------------------------------------------------------------------------------------------------------------------------------------------------------|----------|----------|----------|----------|----------|
| 21 2VZ6 | 1 | 21 | -7.21365 | 4.172278 | 2 | 13 | 14 | 8  | [[35, 42, 46, 94, 31, 56, 6<br>3, 68, 34, 37, 35, 42, 46, 9<br>4, 31, 56, 63, 68, 34, 37],<br>[7, 26, 48, 55, 62, 66, 74,<br>78, 79, 80], [59, 72, 23, 7<br>3, 12, 13, 60, 67, 74, 5], [<br>48, 43, 96, 40, 91, 97, 37,<br>39, 42, 45], [53, 54, 55, 5<br>7, 65, 74, 78, 30, 89, 17]]<br>[[58, 6, 14, 38, 46, 48, 5,<br>7, 12, 20], [12, 14, 20, 23<br>, 38, 43, 56, 58, 59, 63], [<br>66, 2, 26, 34, 36, 45, 35, 3<br>, 29, 37]]<br>[26, [25, 66, 17, 21, 26, 5<br>3, 65, 19, 61, 7], [51, 25,<br>9, 16, 17, 43, 52, 60, 61, 6<br>5], [46, 48, 32, 54, 20, 23<br>, 24, 58, 63, 64]]<br>[[5, 43, 1, 20, 24, 31, 46,<br>59, 64, 16], [20, 43, 46, 5<br>8, 59, 64, 4, 6, 12, 14], 30<br>, [25, 26], [25, 26], [65,<br>17, 25, 50, 51, 57, 61, 66,<br>9, 16], [53, 10, 21, 26, 65<br>, 66, 44, 47, 54, 5], [3, 37<br>, 38, 48, 6, 7, 45, 47, 29, 3<br>9]] | 139.7352 | -70.2042 | -7.42188 | -39.4332 | -7.21365 |
| 22 2VZ6 | 1 | 22 | -6.39868 | 3.805538 | 2 | 3  | 8  |    |                                                                                                                                                                                                                                                                                                                                                                                                                                                                                                                                                                                                                                                                                                                                                                                                                                                        | 306.7271 | -72.6069 | -7.39098 | -13.1868 | -6.39868 |
| 22 2VZ6 | 1 | 22 | -6.01522 | 2.357899 | 1 | 2  | 5  | 8  |                                                                                                                                                                                                                                                                                                                                                                                                                                                                                                                                                                                                                                                                                                                                                                                                                                                        | 317.5465 | -81.3089 | -7.1292  | -6.22448 | -6.01522 |
| 22 2VZ6 | 1 | 22 | -6.0035  | 3.761355 | 2 | 3  | 17 | 25 |                                                                                                                                                                                                                                                                                                                                                                                                                                                                                                                                                                                                                                                                                                                                                                                                                                                        | 294.8612 | -103.755 | -7.85035 | -23.0626 | -6.0035  |



|         |   |    |          |          |   |   |    |    |   |                                                                                                                                                                                                                           |          |          |          |          |          |
|---------|---|----|----------|----------|---|---|----|----|---|---------------------------------------------------------------------------------------------------------------------------------------------------------------------------------------------------------------------------|----------|----------|----------|----------|----------|
| 22 2VZ6 | 1 | 22 | -5.88798 | 2.974981 | 2 | 3 | 5  | 8  | 3 | [[58, 6, 14, 39, 46, 48, 7, 23, 44, 56], [12, 14, 23, 43, 44, 46, 49, 56, 58, 63], [41, 49, 8, 11, 12, 30, 34, 39, 50, 55], [66, 26, 51, 57, 61, 2, 3, 13, 28, 29], [2, 13, 28, 34, 35, 36, 52, 4, 9, 11]]                | 345.0652 | -88.8802 | -7.31491 | -12.4776 | -5.88798 |
| 22 2VZ6 | 1 | 22 | -5.63585 | 2.783762 | 2 | 3 | 4  | 29 | 3 | [[48, 54, 43, 5, 7, 10, 44, 63, 19, 20], [6, 7, 43, 46, 48, 54, 56, 63, 8, 12], [3, 6, 8, 11, 12, 14, 29, 37, 39, 45], 25, [25, 65, 17, 26, 61, 16, 19, 51, 60, 38], [34, 2, 27, 35, 36, 40, 62, 67, 22, 31]]             | 370.5851 | -89.1245 | -9.14106 | -14.0741 | -5.63585 |
| 23 2VZ6 | 1 | 23 | -5.55705 | 1.075281 | 2 | 3 | 17 | 18 | 3 | [[52, 59, 60, 62, 21, 25, 27, 33, 44, 53], [21, 25, 33, 35, 44, 52, 59, 60, 1, 2], 13, 13, 22, [31, 38, 8, 11, 22, 29, 54, 4, 6, 14], [24, 54, 58, 26, 27, 53, 61, 62, 17, 21], [49, 20, 42, 43, 47, 48, 50, 51, 10, 15]] | 61.50467 | -82.1759 | -8.42815 | -16.6031 | -5.55705 |
| 23 2VZ6 | 1 | 23 | -5.51244 | 2.473422 | 2 | 3 | 17 | 18 | 3 | [[27, 52, 59, 60, 62, 21, 23, 25, 33, 53], [21, 23, 25, 33, 35, 52, 55, 56, 59, 60], 13, 13, [31, 38, 8, 11, 22, 29, 54, 4, 6, 14], [24, 54, 58, 26, 27, 61, 62, 53, 17, 25], [49, 15, 20, 42, 43, 50, 7, 16, 37, 44]]    | 61.46875 | -70.1625 | -8.80299 | -14.5608 | -5.51244 |

|         |   |    |          |          |   |   |    |    |                                                                                                                                                                                                                                                      |          |          |          |          |          |
|---------|---|----|----------|----------|---|---|----|----|------------------------------------------------------------------------------------------------------------------------------------------------------------------------------------------------------------------------------------------------------|----------|----------|----------|----------|----------|
| 23 2VZ6 | 1 | 23 | -5.42877 | 1.176842 | 3 | 4 | 6  | 20 | [[25, 33, 35, 52, 59, 2, 6, 9, 14, 16], [2, 6, 7, 11, 15, 16, 23, 30, 33, 37], 24, 2, 4, [31, 3, 4, 8, 28, 29, 38, 46, 48, 51]]                                                                                                                      | 84.09892 | -50.2339 | -8.53404 | -11.3859 | -5.42877 |
| 23 2VZ6 | 1 | 23 | -5.38596 | 1.506028 | 2 | 3 | 17 | 18 | [[52, 59, 62, 21, 25, 33, 4, 5, 53, 2, 6], [21, 25, 33, 3, 5, 45, 52, 59, 62, 1, 2], 13, 13, [31, 38, 8, 11, 22, 29, 54, 4, 6, 14], [24, 54, 58, 26, 27, 61, 53, 17, 25, 60], [49, 15, 20, 42, 43, 47, 50, 51, 10, 37]]                              | 57.90883 | -63.8026 | -8.57619 | -14.2621 | -5.38596 |
| 23 2VZ6 | 1 | 23 | -5.21894 | 1.2928   | 2 | 3 | 17 | 38 | [[62, 21, 25, 26, 33, 44, 5, 2, 53, 59, 14], [21, 25, 33, 35, 44, 52, 55, 59, 62, 2], 13, 13, 13, [46, 8, 17, 24, 28, 31, 58, 3, 18, 32], [2, 7, 58, 60, 61, 62, 26, 32, 2, 4, 17, 18], [20, 50, 51, 37, 49, 4, 10, 11, 29, 38]]                     | 58.21771 | -66.9162 | -8.17636 | -18.2512 | -5.21894 |
| 24 2VZ6 | 1 | 24 | -6.61282 | 1.114819 | 2 | 3 | 5  | 7  | [[33, 46, 56, 60, 69, 80, 3, 8, 9, 14], [3, 8, 9, 19, 26, 33, 46, 48, 56, 60], [33, 80, 26, 35, 70, 81, 27, 30, 46, 39], [45, 4, 44, 47, 49, 52, 62, 1, 2, 5], [67, 37, 47, 50, 71, 84, 25, 27, 34, 39], [64, 12, 15, 23, 53, 5, 4, 57, 66, 72, 73]] | 195.6278 | -100.635 | -6.7369  | -14.9008 | -6.61282 |

|         |   |    |          |          |   |    |    |    |    |                                                                                                                                                                                                                                                                                |          |          |          |          |          |
|---------|---|----|----------|----------|---|----|----|----|----|--------------------------------------------------------------------------------------------------------------------------------------------------------------------------------------------------------------------------------------------------------------------------------|----------|----------|----------|----------|----------|
| 24 2VZ6 | 1 | 24 | -6.29694 | 3.170795 | 2 | 3  | 4  | 7  | 20 | [[40, 42, 85, 87, 36, 43, 88], [85, 40, 70, 82, 26, 35, 38, 42, 81, 87], [8, 18, 19, 26, 27, 33, 46, 60, 61, 70], [38, 75, 83, 31, 35, 76, 81, 82, 30, 51], [49, 52, 64, 22, 53, 54, 63, 5, 11, 45], [45, 49, 52, 62, 4, 10, 11, 20, 37, 47]]                                  | 155.0572 | -40.7031 | -8.79208 | -27.36   | -6.29694 |
| 24 2VZ6 | 1 | 24 | -6.27156 | 3.78036  | 3 | 19 | 4  | 7  | 41 | [[36, 39, 40, 41, 42, 43, 85, 86, 87, 88], [27, 39, 70, 71, 84, 18, 26, 33, 34, 36], [18, 26, 27, 33, 35, 39, 41, 70, 80, 84], [36, 40, 42, 43, 85, 87, 88, 41, 86, 34], [45, 62, 4, 10, 11, 20, 44, 47, 49, 52]]                                                              | 145.5313 | -73.9743 | -7.57342 | -38.4213 | -6.27156 |
| 24 2VZ6 | 1 | 24 | -6.26542 | 3.189135 | 2 | 32 | 13 | 1  | 4  | [[45, 4, 44, 47, 52, 62, 1, 10, 11, 20, 45, 4, 44, 47, 52, 62, 1, 10, 11, 20], [36, 40, 42, 43, 41, 39], [29, 34, 37, 70, 36, 18, 26, 27, 40, 71], [80, 33, 46, 61, 8, 27, 71, 60, 19, 28], [42, 87, 39, 40, 41, 43, 86, 88, 36, 84], [55, 59, 56, 58, 60, 6, 14, 16, 17, 68]] | 155.5837 | -45.4192 | -6.82812 | -35.3101 | -6.26542 |
| 24 2VZ6 | 1 | 24 | -6.16188 | 2.864801 | 2 | 3  | 6  | 20 | 0  | [[29, 34, 37, 47, 62, 4, 10, 20, 44, 45], [10, 20, 29, 44, 47, 50, 62, 2, 4, 7], 33, 33, [33, 26, 30, 70, 75, 80, 83, 48, 51, 60], [76, 31, 35, 38, 75, 81, 34, 36, 37, 39], [61, 73, 28, 55, 66, 79, 9, 14, 19, 23]]                                                          | 214.3155 | -103.934 | -8.94014 | -22.495  | -6.16188 |

|         |   |    |          |          |   |    |    |    |                                                                                                                                                                                                                                                                                                                                                                                                                                                                                                                                                                                                                                                                                                                                                                                                                                                                                  |                                                                                                                                                                                                                                                                                                                                                                                                                           |          |          |          |          |          |
|---------|---|----|----------|----------|---|----|----|----|----------------------------------------------------------------------------------------------------------------------------------------------------------------------------------------------------------------------------------------------------------------------------------------------------------------------------------------------------------------------------------------------------------------------------------------------------------------------------------------------------------------------------------------------------------------------------------------------------------------------------------------------------------------------------------------------------------------------------------------------------------------------------------------------------------------------------------------------------------------------------------|---------------------------------------------------------------------------------------------------------------------------------------------------------------------------------------------------------------------------------------------------------------------------------------------------------------------------------------------------------------------------------------------------------------------------|----------|----------|----------|----------|----------|
| 25 2VZ6 | 1 | 25 | -6.664   | 4.577041 | 1 | 41 | 2  | 12 | [6, 6, [1, 39, 49, 84, 85, 4<br>, 11, 18, 19, 25, 1, 39, 49,<br>84, 85, 4, 11, 18, 19, 25],<br>[57, 30, 53, 65, 66, 3, 22,<br>23, 35, 48], [5, 23, 24, 29<br>, 51, 55, 57, 58, 64, 66], [<br>51, 5, 79, 80, 36, 40, 41, 4<br>2, 43, 44], [7, 53, 9, 28, 3<br>8, 66, 73, 81, 82, 21]]<br>[[72, 74, 2, 33, 5, 20, 51,<br>55, 58, 64], [2, 5, 17, 20,<br>33, 54, 55, 58, 64, 72], [1<br>, 6, 10, 12, 14, 17, 19, 27,<br>29, 32], [2, 54, 47, 72, 15<br>7, 20, 31, 33, 46, 61], [3, 4<br>, 10, 18, 25, 35, 48, 49, 59<br>, 75], 12, 12, 12, [7, 9, 21<br>, 28, 30, 31, 38, 53, 56, 60<br>, [11, 87, 89, 36, 40, 41,<br>42, 43, 44, 45]]<br>[[10, 69, 86, 32, 34, 39, 4<br>1, 43, 49, 87, 10, 69, 86, 3<br>2, 34, 39, 41, 43, 49, 87],<br>[3, 35, 44, 58, 75, 76, 88,<br>90, 5, 23], 5, 5, [5, 51, 64<br>, 29, 8, 23, 24, 57, 58, 62]<br>, [79, 8, 37, 52, 80, 6, 27,<br>29, 64, 78]] | 377.2727                                                                                                                                                                                                                                                                                                                                                                                                                  | -71.8013 | -8.45308 | -30.7546 | -6.664   |          |
| 25 2VZ6 | 1 | 25 | -6.13692 | 2.438672 | 2 | 3  | 4  | 5  | 7                                                                                                                                                                                                                                                                                                                                                                                                                                                                                                                                                                                                                                                                                                                                                                                                                                                                                | 20, 31, 33, 46, 61], [3, 4<br>, 10, 18, 25, 35, 48, 49, 59<br>, 75], 12, 12, 12, [7, 9, 21<br>, 28, 30, 31, 38, 53, 56, 60<br>, [11, 87, 89, 36, 40, 41,<br>42, 43, 44, 45]]<br>[[10, 69, 86, 32, 34, 39, 4<br>1, 43, 49, 87, 10, 69, 86, 3<br>2, 34, 39, 41, 43, 49, 87],<br>[3, 35, 44, 58, 75, 76, 88,<br>90, 5, 23], 5, 5, [5, 51, 64<br>, 29, 8, 23, 24, 57, 58, 62]<br>, [79, 8, 37, 52, 80, 6, 27,<br>29, 64, 78]] | 547.8917 | -81.2818 | -9.27258 | 13.80852 | -6.13692 |
| 25 2VZ6 | 1 | 25 | -6.12186 | 7.345249 | 2 | 13 | 54 | 5  | 5                                                                                                                                                                                                                                                                                                                                                                                                                                                                                                                                                                                                                                                                                                                                                                                                                                                                                | [3, 35, 44, 58, 75, 76, 88,<br>90, 5, 23], 5, 5, [5, 51, 64<br>, 29, 8, 23, 24, 57, 58, 62]<br>, [79, 8, 37, 52, 80, 6, 27,<br>29, 64, 78]]                                                                                                                                                                                                                                                                               | 369.5454 | -56.4877 | -7.1755  | -34.9101 | -6.12186 |

|         |   |    |          |          |   |   |    |    |                                                                                                                                                                                                                                                               |          |          |          |          |          |
|---------|---|----|----------|----------|---|---|----|----|---------------------------------------------------------------------------------------------------------------------------------------------------------------------------------------------------------------------------------------------------------------|----------|----------|----------|----------|----------|
| 25 2VZ6 | 1 | 25 | -5.95866 | 4.346958 | 1 | 2 | 3  | 19 | [25, [3, 35, 76, 77, 48, 22, 30, 65, 66, 16], [3, 18, 25, 35, 48, 49, 59, 75, 76, 8], [4, 10, 11, 25, 36, 40, 41, 42, 49, 59], 11, 11, [43, 45, 89, 91, 44, 90, 41, 78, 87, 40], [79, 62, 6, 27, 37, 64, 80, 2, 33, 72]]                                      | 368.196  | -107.8   | -7.53018 | -21.5537 | -5.95866 |
| 25 2VZ6 | 1 | 25 | -5.83555 | 2.668015 | 1 | 2 | 13 | 54 | [5, [79, 8, 37, 51, 78, 5, 80, 41, 43, 87], [39, 52, 84, 86, 1, 4, 6, 10, 11, 34], 10, 10, 12, [84, 69, 85, 39, 1, 10, 34, 49, 12, 32], [76, 35, 75, 77, 3, 48, 59, 88, 90, 16]]                                                                              | 354.2467 | -48.1088 | -7.1863  | -29.3469 | -5.83555 |
| 26 2VZ6 | 1 | 26 | -6.60549 | 2.210885 | 2 | 3 | 19 | 4  | [[37, 38, 40, 82, 5, 8, 34, 39, 41, 42], [38, 47, 82, 5, 8, 10, 23, 24, 29, 34], [5, 10, 22, 23, 24, 34, 45, 47, 55, 56], [4, 10, 15, 22, 24, 33, 45, 55, 57, 73], [48, 49, 1, 10, 34, 2, 17, 31, 67, 73], [13, 31], [3, 43, 52, 68, 16, 19, 32, 44, 60, 65]] | 397.999  | -76.9537 | -8.7289  | -30.7319 | -6.60549 |

|         |   |    |          |          |    |   |    |    |                                                                                                                                                                                                                                                                                                                                                      |          |          |          |          |          |
|---------|---|----|----------|----------|----|---|----|----|------------------------------------------------------------------------------------------------------------------------------------------------------------------------------------------------------------------------------------------------------------------------------------------------------------------------------------------------------|----------|----------|----------|----------|----------|
| 26 2VZ6 | 1 | 26 | -5.89778 | 3.570346 | 2  | 3 | 17 | 35 | [[47, 55, 76, 22, 23, 56, 64, 83, 8, 15], [22, 23, 45, 47, 55, 56, 57, 63, 76, 15], [4, 4, 4, [41, 42, 85, 39, 47, 83, 86, 40, 37, 34], [37, 39, 41, 42, 40, 38], [2, 13, 6], [2, 31, [2, 49, 1, 6, 18, 48, 50, 5, 17, 26], [77, 8, 35, 37, 39, 40, 41, 42, 83, 85], [31, 59, 67, 68, 9, 25, 30, 36, 58, 65, 31, 59, 67, 68, 9, 25, 30, 36, 58, 65]] | 449.1767 | -113.576 | -7.6651  | -22.606  | -5.89778 |
| 26 2VZ6 | 1 | 26 | -5.8428  | 3.50126  | 2  | 3 | 13 | 6  | [[56, 72, 7, 22, 51, 53, 55, 63, 64, 70, 56, 72, 7, 22, 51, 53, 55, 63, 64, 70], [8, 35, 47, 56, 64, 76, 23, 29, 77, 78], [9, 30, 36, 66, 71, 79, 80, 81, 3, 19], [6, 6, 31, [68, 31, 43, 67, 69, 11, 52, 2, 13, 49], [39, 41, 42, 83, 85, 34, 37, 38, 40, 86], [37, 39, 41, 42, 40, 38]]                                                            | 402.1272 | -81.4631 | -8.0334  | -30.7348 | -5.8428  |
| 26 2VZ6 | 1 | 26 | -5.77701 | 3.429343 | 62 | 1 | 41 | 2  | [[31, 1, 1, [48, 69, 1, 2, 49, 11, 13, 16, 17, 18], [39, 48, 49, 83, 37, 41, 42, 85, 34, 38], [37, 39, 41, 42, 40, 38], [37, 39, 41, 42, 40, 38], [4, 28, 33, 45, 55, 62, 63, 74, 75, 15], [47, 35, 76, 77, 8, 23, 29, 55, 78], [7, [76, 35, 77, 78, 8, 50, 34, 37, 38, 39]]                                                                         | 399.4441 | -84.1661 | -7.67557 | -33.4232 | -5.77701 |

|         |   |    |          |          |   |    |    |    |                                                                                                                                                                                                                                                                                                                                                                                                                                                                                                                                                                                                                                                                                                                                                                                                                                                                                                                                                            |          |          |          |          |          |
|---------|---|----|----------|----------|---|----|----|----|------------------------------------------------------------------------------------------------------------------------------------------------------------------------------------------------------------------------------------------------------------------------------------------------------------------------------------------------------------------------------------------------------------------------------------------------------------------------------------------------------------------------------------------------------------------------------------------------------------------------------------------------------------------------------------------------------------------------------------------------------------------------------------------------------------------------------------------------------------------------------------------------------------------------------------------------------------|----------|----------|----------|----------|----------|
| 26 2VZ6 | 1 | 26 | -5.58324 | 6.628027 | 2 | 3  | 40 | 15 | [[47, 55, 22, 23, 56, 57, 7<br>8, 15, 24, 29, 47, 55, 22, 2<br>3, 56, 57, 78, 15, 24, 29],<br>[40, 42, 55, 84, 86, 41, 85<br>, 38, 39, 73], 10, [5, 6, 8,<br>10, 49, 50, 76, 35, 2, 18],<br>[69, 2, 49, 48, 1, 31, 67, 6<br>8, 11, 46], [10, 34, 37, 38<br>, 40, 82, 84, 39, 42, 83], [<br>75, 68, 33, 73, 4, 46, 54, 7<br>4, 69, 31]]<br>[[5, 50, 85, 87, 23, 39, 41<br>, 56, 81, 35], 5, 5, [3, 5, 1<br>5, 17, 22, 23, 24, 38, 40, 4<br>42], 1, [4, 10, 35, 51, 6, 79<br>, 38, 40, 86, 49], 16, [2, 5<br>3, 61, 69, 33, 73, 74, 16, 1<br>8, 20]]<br>[[86, 4, 5, 10, 24, 35, 38,<br>40, 50, 58], [3, 5, 15, 22,<br>23, 24, 38, 39, 41, 43], 31<br>11, [49, 85, 39, 41, 47, 8<br>7, 35, 38, 43, 77], 13, 13,<br>[2, 44, 53, 16, 20, 33, 61,<br>74, 1, 6]]<br>[[33, 61, 73, 74, 2, 6, 20,<br>26, 54, 63], [6, 8, 20, 22,<br>23, 26, 28, 33, 36, 54], 5,<br>[80, 51, 8, 36, 85, 79, 81,<br>4, 10, 35], 11, 11, [10, 3,<br>11, 31, 47, 48, 68, 69, 77,<br>1]] | 402.7975 | -47.9826 | -7.43311 | -30.31   | -5.58324 |
| 27 2VZ6 | 1 | 27 | -6.89091 | 3.428299 | 3 | 17 | 18 | 42 | 256.4904                                                                                                                                                                                                                                                                                                                                                                                                                                                                                                                                                                                                                                                                                                                                                                                                                                                                                                                                                   | -42.0939 | -7.41796 | -33.8246 | -6.89091 |          |
| 27 2VZ6 | 1 | 27 | -6.79982 | 2.318941 | 3 | 4  | 48 | 45 | 363.2625                                                                                                                                                                                                                                                                                                                                                                                                                                                                                                                                                                                                                                                                                                                                                                                                                                                                                                                                                   | -39.3318 | -7.206   | -32.2488 | -6.79982 |          |
| 27 2VZ6 | 1 | 27 | -6.66515 | 2.948341 | 3 | 19 | 33 | 7  | 381.5758                                                                                                                                                                                                                                                                                                                                                                                                                                                                                                                                                                                                                                                                                                                                                                                                                                                                                                                                                   | -43.7552 | -7.62081 | -29.1629 | -6.66515 |          |

|         |   |    |          |          |    |    |    |                                                                                                                                                                                                                                                                                                                                                                                                                                                                                                                                                                                                                                                                                                                                                                                                                                                                                                                                            |          |          |          |          |          |
|---------|---|----|----------|----------|----|----|----|--------------------------------------------------------------------------------------------------------------------------------------------------------------------------------------------------------------------------------------------------------------------------------------------------------------------------------------------------------------------------------------------------------------------------------------------------------------------------------------------------------------------------------------------------------------------------------------------------------------------------------------------------------------------------------------------------------------------------------------------------------------------------------------------------------------------------------------------------------------------------------------------------------------------------------------------|----------|----------|----------|----------|----------|
| 27 2VZ6 | 1 | 27 | -6.22593 | 3.410486 | 53 | 3  | 19 | [11, [3, 34, 46, 47, 58, 76<br>, 77, 78, 4, 15], [1, 4, 10,<br>17, 24, 35, 38, 39, 41, 47]<br>3, 10, [40, 42, 86, 88, 43, 8<br>9, 41, 10, 35, 38], [8, 28,<br>63, 73, 26, 33, 36, 51, 54,<br>61]]<br>[[70, 71, 1, 32, 47, 49, 72<br>, 40, 86, 4], [46, 56, 58, 7<br>6, 78, 5, 10, 22, 23, 24], 5<br>5, 5, [5, 50, 63, 81, 56, 36,<br>79, 8, 23, 28], [64, 7, 27,<br>29, 52, 62, 65, 21, 76, 56]<br>]<br>[[34, 49, 51, 2, 6, 15, 16,<br>17, 35, 36], [2, 6, 15, 34,<br>35, 36, 39, 49, 51, 1], 19,<br>19, [52, 59, 60, 3, 8, 19, 2<br>5, 38, 53, 9], [14, 40, 47,<br>50, 52, 64, 27, 46, 16, 23]<br>, [33, 72, 74, 32, 73, 71, 2<br>8, 31, 69, 21]]<br>[[13, 5, 11, 39, 41, 45, 65<br>, 38, 42, 43], [5, 13, 38, 3<br>9, 41, 45, 54, 65, 1, 3], [2<br>0, 54, 64, 45, 53, 9, 13, 14<br>8, 27, 46], [36, 10, 17, 21,<br>24, 26, 34, 35, 55, 57], [1<br>2, 34, 44, 49, 51, 6, 15, 16<br>, 23, 43], [16, 23, 30, 50,<br>51, 66, 67, 68, 6, 14]] | 372.7449 | -62.0774 | -7.34047 | -27.9357 | -6.22593 |
| 27 2VZ6 | 1 | 27 | -5.75725 | 3.068823 | 2  | 13 | 54 | 5, 5, [5, 50, 63, 81, 56, 36,<br>79, 8, 23, 28], [64, 7, 27,<br>29, 52, 62, 65, 21, 76, 56]<br>]<br>[[34, 49, 51, 2, 6, 15, 16,<br>17, 35, 36], [2, 6, 15, 34,<br>35, 36, 39, 49, 51, 1], 19,<br>19, [52, 59, 60, 3, 8, 19, 2<br>5, 38, 53, 9], [14, 40, 47,<br>50, 52, 64, 27, 46, 16, 23]<br>, [33, 72, 74, 32, 73, 71, 2<br>8, 31, 69, 21]]<br>[[13, 5, 11, 39, 41, 45, 65<br>, 38, 42, 43], [5, 13, 38, 3<br>9, 41, 45, 54, 65, 1, 3], [2<br>0, 54, 64, 45, 53, 9, 13, 14<br>8, 27, 46], [36, 10, 17, 21,<br>24, 26, 34, 35, 55, 57], [1<br>2, 34, 44, 49, 51, 6, 15, 16<br>, 23, 43], [16, 23, 30, 50,<br>51, 66, 67, 68, 6, 14]]                                                                                                                                                                                                                                                                                                     | 363.4589 | -83.7842 | -8.42769 | -29.6892 | -5.75725 |
| 28 2VZ6 | 1 | 28 | -5.98607 | 4.218321 | 2  | 3  | 29 | 30, 19, [52, 59, 60, 3, 8, 19, 2<br>5, 38, 53, 9], [14, 40, 47,<br>50, 52, 64, 27, 46, 16, 23]<br>, [33, 72, 74, 32, 73, 71, 2<br>8, 31, 69, 21]]<br>[[13, 5, 11, 39, 41, 45, 65<br>, 38, 42, 43], [5, 13, 38, 3<br>9, 41, 45, 54, 65, 1, 3], [2<br>0, 54, 64, 45, 53, 9, 13, 14<br>8, 27, 46], [36, 10, 17, 21,<br>24, 26, 34, 35, 55, 57], [1<br>2, 34, 44, 49, 51, 6, 15, 16<br>, 23, 43], [16, 23, 30, 50,<br>51, 66, 67, 68, 6, 14]]                                                                                                                                                                                                                                                                                                                                                                                                                                                                                                  | 161.7632 | -59.6401 | -7.60038 | -6.4741  | -5.98607 |
| 28 2VZ6 | 1 | 28 | -5.80021 | 2.145646 | 2  | 3  | 5  | 7, 8, 27, 46], [36, 10, 17, 21,<br>24, 26, 34, 35, 55, 57], [1<br>2, 34, 44, 49, 51, 6, 15, 16<br>, 23, 43], [16, 23, 30, 50,<br>51, 66, 67, 68, 6, 14]]                                                                                                                                                                                                                                                                                                                                                                                                                                                                                                                                                                                                                                                                                                                                                                                   | 177.247  | -53.1539 | -7.00441 | 1.527965 | -5.80021 |



|         |   |    |          |          |    |    |    |                                                                                                                              |          |                                                                                                                                                      |          |          |          |          |          |
|---------|---|----|----------|----------|----|----|----|------------------------------------------------------------------------------------------------------------------------------|----------|------------------------------------------------------------------------------------------------------------------------------------------------------|----------|----------|----------|----------|----------|
| 28 2VZ6 | 1 | 28 | -5.57607 | 1.955488 | 4  | 7  | 11 | [[8, 18, 19, 25, 26, 52, 59, 60, 29, 32], [74, 33, 72, 41, 65, 29, 32, 73, 53, 54], [35, 42, 55, 4, 10, 11, 21, 22, 36, 37]] | 140.9987 | -44.6685                                                                                                                                             | -7.76043 | -26.9894 | -5.57607 |          |          |
| 28 2VZ6 | 1 | 28 | -5.46307 | 2.412669 | 2  | 3  | 4  | 5                                                                                                                            | 6        | 4, 27, 45, 46, 47], 21, [36, 10, 17, 24, 26, 34, 35, 55, 57, 61], [49, 15, 16, 44, 51, 23, 34, 6, 12, 43], [16, 23, 30, 50, 51, 66, 67, 68, 58, 24]] | 179.9754 | -68.5815 | -6.77908 | 1.166421 | -5.46307 |
| 28 2VZ6 | 1 | 28 | -5.24232 | 4.281159 | 2  | 13 | 14 | 1                                                                                                                            | 1        | 39, 42, 44, 55, 1, 2], [24, 50, 57, 58, 17, 56, 51, 16, 6, 23], [31, 69, 71, 28, 7, 0, 55, 10, 21, 36, 26]]                                          | 141.0039 | -46.2893 | -7.36913 | -24.6142 | -5.24232 |
| 29 2VZ6 | 1 | 29 | -7.06983 | 2.278996 | 2  | 3  | 17 | 4                                                                                                                            | 9        | [4, 20, 24, 31, 33, 36, 3, 9, 45, 49, 61], [50, 25, 34, 41, 48, 77, 13, 23, 43, 52]]                                                                 | 434.0211 | -94.4771 | -9.22329 | -22.2562 | -7.06983 |
| 29 2VZ6 | 1 | 29 | -6.75824 | 3.212933 | 33 | 34 | 4  | 4                                                                                                                            | 4        | [32, 32, [1, 14, 23, 32, 34, 48, 52, 53, 54, 70], 36, 3, 6, [4, 39, 62, 2, 37, 47, 55, 56, 15, 21]]                                                  | 369.0924 | -42.6657 | -9.38669 | -33.8402 | -6.75824 |

|         |   |                                |                                                                                                                                                                                                                                                                                                                                                     |                                              |
|---------|---|--------------------------------|-----------------------------------------------------------------------------------------------------------------------------------------------------------------------------------------------------------------------------------------------------------------------------------------------------------------------------------------------------|----------------------------------------------|
| 29 2VZ6 | 1 | 29 -6.50016 5.764889 2 17 19 7 | [[8, 10, 69, 71, 6, 16], 34<br>, [25, 27, 34, 41, 44, 50, 1<br>0, 16, 19, 29], [68, 7, 9, 7<br>0, 6, 67, 51, 83, 5, 26], [4<br>5, 49, 20, 21, 39, 46, 52, 2<br>4, 31, 33]]                                                                                                                                                                          | 222.1527 -85.8332 -8.96776 -33.552 -6.50016  |
| 29 2VZ6 | 1 | 29 -6.44383 2.240024 2 56 3 5  | [[34, 70, 27, 44, 48, 54, 1<br>, 23, 32, 45], 34, [27, 34,<br>41, 44, 48, 54, 1, 17, 18, 1<br>9], [9, 10, 16, 27, 34, 41,<br>70, 7, 71, 6], 36, 36, [49,<br>84, 5, 24, 26, 36, 40, 65, 3<br>1, 33], [62, 63, 80, 81, 2,<br>15, 37, 55, 56, 4]]                                                                                                      | 407.6632 -73.8133 -7.81894 -9.11484 -6.44383 |
| 29 2VZ6 | 1 | 29 -6.21449 1.698579 2 3 17 18 | [[42, 72, 17, 22, 47, 58, 7<br>5, 3, 11, 12], [17, 22, 39,<br>42, 44, 47, 4, 19, 20, 21],<br>39, 39, [4, 20, 24, 31, 33,<br>36, 39, 45, 49, 61], [40, 4<br>4, 49, 64, 65, 42, 76, 5, 66<br>, 26], [48, 23, 25, 27, 32,<br>34, 41, 50, 54, 71], [59, 3<br>, 13, 35, 77, 83, 29, 64, 76<br>, 38], 33, 33, [2, 37, 53, 5<br>5, 56, 78, 1, 14, 15, 52]] | 421.3815 -76.3525 -9.13037 -16.6607 -6.21449 |
| 30 2VZ6 | 1 | 30 -6.35791 3.587004 2 13 54 5 | [[55, 1, 10, 13, 20, 36, 61<br>, 2, 6, 19, 55, 1, 10, 13, 20<br>, 36, 61, 2, 6, 19], [38, 39<br>, 75, 76, 77, 78, 79, 80, 35<br>, 12], 12, 12, [12, 41, 48,<br>95, 5, 60, 93, 94, 11, 40],<br>3, [94, 95, 96, 11, 48, 49,<br>93, 41, 97, 5]]                                                                                                        | 199.5613 -38.5235 -5.77957 -35.3912 -6.35791 |

|         |   |    |          |          |    |    |    |    |                                                                                                                                                                                                                                                                                                                                                |          |          |          |          |          |
|---------|---|----|----------|----------|----|----|----|----|------------------------------------------------------------------------------------------------------------------------------------------------------------------------------------------------------------------------------------------------------------------------------------------------------------------------------------------------|----------|----------|----------|----------|----------|
| 30 2VZ6 | 1 | 30 | -6.03488 | 5.467257 | 28 | 2  | 3  | 32 | [[73, 9, 37, 46, 74, 87, 88, 2, 34, 68], [37, 73, 88, 2, 9, 46, 87, 89, 55, 72], [2, 37, 55, 61, 72, 73, 98, 6, 23, 29], 13, [12, 41, 52, 54, 60, 5, 21, 28, 48, 93, 12, 41, 52, 54, 60, 5, 21, 28, 48, 93]]                                                                                                                                   | 114.1714 | -64.996  | -4.56471 | -24.3518 | -6.03488 |
| 30 2VZ6 | 1 | 30 | -5.98185 | 5.480834 | 2  | 13 | 54 | 5  | [[39, 52, 60, 80, 28, 54, 5, 12, 18, 21], [13, 48, 93, 95, 97, 10, 36, 42, 45, 49], 10, 10, [10, 49, 97, 98, 9, 6, 1, 36, 55], [68, 87, 63, 46, 88, 9, 89, 34, 51, 69]]                                                                                                                                                                        | 223.3679 | -56.9637 | -3.12104 | -29.6711 | -5.98185 |
| 30 2VZ6 | 1 | 30 | -5.97013 | 2.188395 | 2  | 3  | 4  | 5  | [[80, 3, 39, 77, 79, 86, 25, 54, 57, 70], [3, 25, 39, 54, 57, 79, 80, 5, 16, 18], [4, 11, 12, 18, 21, 26, 27, 28, 33, 40], [66, 3, 57, 80, 39, 78, 25, 31, 33, 64], [5, 5, 2, 20, 23, 51, 53, 59, 61, 19, 22], [75, 76, 30, 38, 62, 63, 68, 71, 88, 34], [9, 34, 46, 50, 68, 69, 87, 88, 99, 100], 10, [82, 83, 13, 7, 42, 43, 96, 98, 6, 10]] | 366.6837 | -22.9892 | -3.62628 | 12.17205 | -5.97013 |
| 30 2VZ6 | 1 | 30 | -5.93565 | 4.069573 | 28 | 2  | 56 | 5  | [[72, 68, 87, 9, 34, 46, 88, 89, 37, 74], [68, 72, 87, 2, 53, 55, 63, 75, 76, 9], 10, [2, 10, 20, 23, 37, 53, 55, 61, 68, 72], [84, 45, 86, 96, 1, 36, 85, 12, 49, 98], 3, [92, 95, 4, 40, 47, 58, 60, 94, 11, 26]]                                                                                                                            | 107.3473 | -56.2131 | -5.0647  | -15.4497 | -5.93565 |

|         |   |    |          |          |   |    |    |    |    |                                                                                                                                                                                                                                                                                                                                                                                                                                                                                                                                                                                                                                                                                                                                                                                                                                                                                                                                                                                                            |          |          |          |          |          |
|---------|---|----|----------|----------|---|----|----|----|----|------------------------------------------------------------------------------------------------------------------------------------------------------------------------------------------------------------------------------------------------------------------------------------------------------------------------------------------------------------------------------------------------------------------------------------------------------------------------------------------------------------------------------------------------------------------------------------------------------------------------------------------------------------------------------------------------------------------------------------------------------------------------------------------------------------------------------------------------------------------------------------------------------------------------------------------------------------------------------------------------------------|----------|----------|----------|----------|----------|
| 31 2VZ6 | 1 | 31 | -7.50212 | 3.573419 | 1 | 2  | 3  | 4  | 5  | [19, [40, 63, 19, 28, 30, 3<br>5, 47, 75, 89, 8], [19, 28,<br>35, 40, 47, 49, 63, 3, 8, 13<br>], [4, 11, 21, 27, 34, 37, 3<br>8, 48, 49, 61], [42, 44, 89<br>, 91, 35, 39, 40, 46, 85, 43<br>], 29, [33, 26, 73, 82, 90,<br>18, 29, 36, 74, 92], [88, 4<br>3, 45, 92, 39, 42, 44, 46, 8<br>9, 91], [39, 43, 45, 46, 44<br>, 42], [39, 43, 45, 46, 44,<br>42], [23, 25, 69, 70, 71, 7<br>2, 51, 56, 2, 6]]<br>[[49, 8, 13, 47, 48, 84, 1,<br>3, 4, 18, 49, 8, 13, 47, 48,<br>84, 1, 3, 4, 18], [38, 92, 3<br>4, 37, 43, 45, 73, 82, 83, 8<br>5], [33, 34, 38, 50, 82, 37<br>1, 85, 7, 10, 21], [72, 25, 7<br>0, 53, 59, 6, 14, 23, 58, 69<br>], [87, 88, 33, 41, 82, 86,<br>36, 73, 71, 17], 24, [60, 1<br>5, 23, 24, 32, 79, 81, 6, 12<br>, 16]]<br>[[24, 32, 61, 62, 79, 80, 1<br>3, 16, 57, 67], 13, 13, [5,<br>13, 16, 22, 24, 48, 61, 62,<br>66, 67], [1, 3, 4, 5, 8, 13,<br>22, 47, 48, 49], 23, 23, [5<br>6, 69, 12, 23, 57, 66, 5, 51<br>, 52, 54], 33, [25, 53, 71,<br>72, 59, 7, 14, 17, 50, 65]] | 287.501  | -71.5074 | -5.49739 | -27.4287 | -7.50212 |
| 31 2VZ6 | 1 | 31 | -7.30869 | 2.484534 | 2 | 12 | 13 | 14 | 15 | [1, 85, 7, 10, 21], [72, 25, 7<br>0, 53, 59, 6, 14, 23, 58, 69<br>], [87, 88, 33, 41, 82, 86,<br>36, 73, 71, 17], 24, [60, 1<br>5, 23, 24, 32, 79, 81, 6, 12<br>, 16]]<br>[[24, 32, 61, 62, 79, 80, 1<br>3, 16, 57, 67], 13, 13, [5,<br>13, 16, 22, 24, 48, 61, 62,<br>66, 67], [1, 3, 4, 5, 8, 13,<br>22, 47, 48, 49], 23, 23, [5<br>6, 69, 12, 23, 57, 66, 5, 51<br>, 52, 54], 33, [25, 53, 71,<br>72, 59, 7, 14, 17, 50, 65]]                                                                                                                                                                                                                                                                                                                                                                                                                                                                                                                                                                           | 242.4029 | -48.0259 | -5.24844 | -40.3385 | -7.30869 |
| 31 2VZ6 | 1 | 31 | -6.45331 | 2.191996 | 3 | 17 | 18 | 19 | 20 | [1, 85, 7, 10, 21], [72, 25, 7<br>0, 53, 59, 6, 14, 23, 58, 69<br>], [87, 88, 33, 41, 82, 86,<br>36, 73, 71, 17], 24, [60, 1<br>5, 23, 24, 32, 79, 81, 6, 12<br>, 16]]<br>[[24, 32, 61, 62, 79, 80, 1<br>3, 16, 57, 67], 13, 13, [5,<br>13, 16, 22, 24, 48, 61, 62,<br>66, 67], [1, 3, 4, 5, 8, 13,<br>22, 47, 48, 49], 23, 23, [5<br>6, 69, 12, 23, 57, 66, 5, 51<br>, 52, 54], 33, [25, 53, 71,<br>72, 59, 7, 14, 17, 50, 65]]                                                                                                                                                                                                                                                                                                                                                                                                                                                                                                                                                                           | 261.6761 | -50.9598 | -5.18071 | -36.7257 | -6.45331 |

|         |   |    |          |          |   |    |    |    |                                                                                                                                                                                                                                                                                                                                           |          |          |          |          |          |
|---------|---|----|----------|----------|---|----|----|----|-------------------------------------------------------------------------------------------------------------------------------------------------------------------------------------------------------------------------------------------------------------------------------------------------------------------------------------------|----------|----------|----------|----------|----------|
| 31 2VZ6 | 1 | 31 | -6.42199 | 3.031888 | 2 | 12 | 13 | 2  | [[38, 48, 49, 66, 67, 8, 22, 34, 47, 68, 38, 48, 49, 66, 67, 8, 22, 34, 47, 68], [8, 5, 83, 92, 37, 43, 45, 73, 8, 2, 90, 33], [27, 33, 50, 82, 85, 37, 83, 7, 10, 18], 23, 23, [53, 59, 69, 72, 23, 2, 5, 70, 71, 14, 58], 33, [87, 88, 26, 29, 33, 36, 41, 73, 74, 82], [60, 16, 61, 62, 80, 15, 24, 32, 58, 79]]                       | 261.9915 | -46.4136 | -5.562   | -39.3324 | -6.42199 |
| 31 2VZ6 | 1 | 31 | -6.40358 | 3.389037 | 2 | 3  | 13 | 14 | [[82, 33, 43, 73, 90, 92, 2, 6, 27, 36, 39, 82, 33, 43, 7, 3, 90, 92, 26, 27, 36, 39], [43, 45, 87, 90, 92, 35, 39, 42, 44, 46], [22, 34, 37, 38, 48, 49, 66, 67, 68, 84], [67, 13, 52, 68, 22, 5, 12, 47, 54, 57], [45, 46, 92, 93, 38, 43, 83, 90, 39, 42], [39, 43, 45, 46, 44, 42], 11, 11, [64, 81, 11, 21, 62, 65, 66, 24, 31, 32]] | 253.8176 | -55.7022 | -7.01011 | -35.1646 | -6.40358 |
| 32 2VZ6 | 1 | 32 | -6.87443 | 3.713197 | 2 | 56 | 3  | 15 | [[71, 2, 9, 42, 50, 51, 52, 73, 82, 87], 42, [9, 42, 51, 52, 71, 73, 87, 92, 93, 2], [11, 20, 21, 22, 26, 27, 3, 3, 40, 76, 86], 40, 40, [35, 43, 16, 62, 84, 85, 77, 11, 21, 6], [36, 64, 17, 94, 9, 5, 3, 6, 28, 29, 39]]                                                                                                               | 262.581  | -19.6335 | -2.55163 | -32.1638 | -6.87443 |

|         |   |                                |                                                                                                                                                                                                                                                                    |                                              |
|---------|---|--------------------------------|--------------------------------------------------------------------------------------------------------------------------------------------------------------------------------------------------------------------------------------------------------------------|----------------------------------------------|
| 32 2VZ6 | 1 | 32 -6.53386 3.588915 3 19 4 7  | [[51, 87, 2, 16, 21, 43, 50, 76, 93, 11], [2, 11, 21, 2, 7, 42, 51, 76, 87, 92, 93], [7, 11, 22, 40, 51, 52, 66, 67, 76, 77], [16, 35, 2, 50, 52, 62, 66, 77, 84, 11], [6, 63, 74, 10, 34, 39, 75, 94, 15, 17]]                                                    | 263.7365 -13.1916 -3.93932 -28.7191 -6.53386 |
| 32 2VZ6 | 1 | 32 -6.14128 2.481603 2 12 13 1 | [[75, 9, 10, 42, 72, 82, 91, 14, 25, 26], [2, 16, 35, 4, 3, 50, 51, 87, 21, 71, 76], [7, 11, 21, 66, 67, 71, 76, 87, 93, 73], [37, 65, 67, 7, 8, 7, 12, 18, 79, 66, 61], 4, 0, [70, 8, 68, 69, 89, 5, 59, 60, 61, 13]]                                             | 269.0805 -26.2085 -6.23271 -27.8102 -6.14128 |
| 32 2VZ6 | 1 | 32 -6.06606 2.476185 2 13 14 1 | [[65, 61, 71, 86, 92, 7, 12, 20, 66, 67, 65, 61, 71, 86, 92, 7, 12, 20, 66, 67], [1, 3, 25, 32, 46, 59, 74, 75, 8, 10, 81, 91], [49, 1, 10, 47, 75, 83, 48, 74, 82, 14], [6, 9, 70, 8, 68, 74, 81, 95, 36, 13, 41], 35, [50, 52, 2, 3, 5, 16, 51, 43, 72, 82, 83]] | 260.2807 4.76986 -2.89784 -34.0512 -6.06606  |
| 32 2VZ6 | 1 | 32 -5.93977 2.293616 19 11     | [[7, 11, 40, 65, 66, 67, 76, 77, 87, 21], [94, 95, 10, 17, 28, 29, 44, 47, 74, 81, 94, 95, 10, 17, 28, 29, 44, 47, 74, 81]]                                                                                                                                        | 256.6953 -12.2468 -2.79842 -23.4317 -5.93977 |

|         |   |    |          |          |   |    |    |   |   |                                                                                                                                                                                                                                                                                                                                                                                                                                                                                                                                                                                                                                                                                                                                                                                                                                                                                                                                                                                                                                                                           |          |          |          |          |          |
|---------|---|----|----------|----------|---|----|----|---|---|---------------------------------------------------------------------------------------------------------------------------------------------------------------------------------------------------------------------------------------------------------------------------------------------------------------------------------------------------------------------------------------------------------------------------------------------------------------------------------------------------------------------------------------------------------------------------------------------------------------------------------------------------------------------------------------------------------------------------------------------------------------------------------------------------------------------------------------------------------------------------------------------------------------------------------------------------------------------------------------------------------------------------------------------------------------------------|----------|----------|----------|----------|----------|
| 33 2VZ6 | 1 | 33 | -6.29735 | 1.120934 | 2 | 3  | 4  | 5 | 7 | [[[34, 37, 38, 13, 16, 18, 3<br>9, 40, 59, 17], [18, 19, 34<br>, 37, 39, 40, 67, 7, 11, 21]<br>, [2, 4, 11, 30, 32, 44, 45,<br>46, 47, 51], [40, 32, 37, 9<br>, 16, 17, 19, 22, 27, 62], [<br>57, 65, 5, 6, 10, 36, 42, 54<br>, 64, 7], [61, 8, 33, 60, 12<br>, 28, 35, 36, 41, 68]]<br>[[[34, 37, 38, 39, 68, 13, 1<br>6, 18, 19, 26], [18, 19, 32<br>, 34, 37, 39, 40, 66, 67, 11<br>, [32, 40, 37, 16, 19, 22,<br>24, 27, 28, 69], [6, 10, 55<br>, 57, 58, 65, 7, 25, 56, 1],<br>[35, 61, 8, 33, 60, 14, 36,<br>41, 44, 63]]<br>[[[71, 29, 53, 55, 4, 5, 24,<br>32, 52, 54], [2, 11, 45, 47<br>, 66, 67, 30, 32, 46, 39], [<br>18, 19, 34, 37, 39, 40, 51,<br>67, 4, 13], [17, 38, 33, 60<br>, 34, 27, 8, 12, 16, 37], 26<br>, 26, [7, 26, 39, 59, 67, 6,<br>56, 58, 11, 18], [49, 3, 31<br>, 48, 50, 69, 27, 62, 33, 12<br>]]<br>[[[16, 34, 37, 38, 39, 40, 1<br>3, 17, 18, 19], [9, 28, 29,<br>51, 62, 63, 70, 4, 22, 24],<br>[43, 1, 42, 44, 54, 5, 71, 1<br>0, 64, 65], [3, 31, 49, 50,<br>9, 62, 63, 14, 35, 44], [66<br>, 58, 65, 11, 47, 67, 2, 7, 1<br>0, 21]] | 268.4001 | -101.811 | -7.67823 | -10.6881 | -6.29735 |
| 33 2VZ6 | 1 | 33 | -5.32383 | 2.154276 | 2 | 3  | 5  | 7 | 8 | 190.7498                                                                                                                                                                                                                                                                                                                                                                                                                                                                                                                                                                                                                                                                                                                                                                                                                                                                                                                                                                                                                                                                  | -88.1295 | -7.45693 | 9.977112 | -5.32383 |          |
| 33 2VZ6 | 1 | 33 | -5.31965 | 1.33931  | 2 | 12 | 13 | 1 | 1 | 129.5802                                                                                                                                                                                                                                                                                                                                                                                                                                                                                                                                                                                                                                                                                                                                                                                                                                                                                                                                                                                                                                                                  | -60.4676 | -7.60408 | -27.5183 | -5.31965 |          |
| 33 2VZ6 | 1 | 33 | -5.13107 | 1.897782 | 2 | 13 | 14 | 1 | 1 | 133.0236                                                                                                                                                                                                                                                                                                                                                                                                                                                                                                                                                                                                                                                                                                                                                                                                                                                                                                                                                                                                                                                                  | -66.0314 | -7.84805 | -24.9593 | -5.13107 |          |

|         |   |                                |                                                                                                                                                                                |                                             |
|---------|---|--------------------------------|--------------------------------------------------------------------------------------------------------------------------------------------------------------------------------|---------------------------------------------|
| 33 2VZ6 | 1 | 33 -5.10051 1.555056 2 3 4 6 2 | [[35, 49, 50, 3, 9, 14, 31, 62, 63, 12], [14, 35, 50, 61, 62, 8, 9, 12, 20, 36], [62, 7, 8, 15, 23, 26, 36, 56, 57, 59], 28, 28, [37, 16, 17, 27, 34, 38, 13, 28, 40, 69], 28] | 149.248 -54.4718 -7.21833 -13.7488 -5.10051 |
|---------|---|--------------------------------|--------------------------------------------------------------------------------------------------------------------------------------------------------------------------------|---------------------------------------------|

---
